# Supplementary material for: Predicting the cation–π binding of substituted benzenes: energy decomposition calculations and the development of a cation–π substituent constant
Source: Royal Society of Chemistry journal article supplement (doi:10.1039/c4ra08638d), 2014-01-01
Supplement: c4ra08638d1.pdf [file c4ra08638d1.pdf]

**Supplemental Material: Predicting the Cation- $\pi$  Binding of Substituted Benzenes: Energy Decomposition Calculations and the Development of a Cation- $\pi$  Substituent Constant.**

*Authors: Selina Wireduaah, Trent M. Parker, Christina Bagwill, Charles C. Kirkpatrick\* and Michael Lewis\*, Department of Chemistry, Saint Louis University*

**Table S1.** MP2(full)/6-311++G\*\* Total Energies (hartrees) and Number of Imaginary Frequencies (NI) for all Substituted Benzenes.

| Aromatic                                                  | E <sub>Total</sub> | NI | Aromatic                                                                 | E <sub>Total</sub> | NI |
|-----------------------------------------------------------|--------------------|----|--------------------------------------------------------------------------|--------------------|----|
| C <sub>6</sub> H <sub>6</sub>                             | -231.697672        | 1  | <i>m</i> -C <sub>6</sub> H <sub>4</sub> (NO <sub>2</sub> ) <sub>2</sub>  | -640.020621        | 0  |
| C <sub>6</sub> H <sub>5</sub> F                           | -330.795134        | 1  | <i>p</i> -C <sub>6</sub> H <sub>4</sub> (NO <sub>2</sub> ) <sub>2</sub>  | -640.022271        | 0  |
| <i>o</i> -C <sub>6</sub> H <sub>4</sub> F <sub>2</sub>    | -429.885239        | 1  | C <sub>6</sub> H <sub>5</sub> CH <sub>3</sub>                            | -270.917303        | 0  |
| <i>m</i> -C <sub>6</sub> H <sub>4</sub> F <sub>2</sub>    | -429.891294        | 0  | <i>o</i> -C <sub>6</sub> H <sub>4</sub> (CH <sub>3</sub> ) <sub>2</sub>  | -310.137196        | 0  |
| <i>p</i> -C <sub>6</sub> H <sub>4</sub> F <sub>2</sub>    | -429.890191        | 0  | <i>m</i> -C <sub>6</sub> H <sub>4</sub> (CH <sub>3</sub> ) <sub>2</sub>  | -310.136859        | 0  |
| C <sub>6</sub> H <sub>3</sub> F <sub>3</sub>              | -528.986133        | 0  | <i>p</i> -C <sub>6</sub> H <sub>4</sub> (CH <sub>3</sub> ) <sub>2</sub>  | -310.136623        | 0  |
| C <sub>6</sub> H <sub>2</sub> F <sub>4</sub>              | -628.066687        | 1  | C <sub>6</sub> H <sub>3</sub> (CH <sub>3</sub> ) <sub>3</sub>            | -349.356311        | 0  |
| C <sub>6</sub> H <sub>5</sub> Cl                          | -690.808194        | 1  | C <sub>6</sub> H <sub>2</sub> (CH <sub>3</sub> ) <sub>4</sub>            | -388.576381        | 0  |
| <i>o</i> -C <sub>6</sub> H <sub>4</sub> Cl <sub>2</sub>   | -1149.914885       | 1  | C <sub>6</sub> H <sub>5</sub> OH                                         | -306.799043        | 1  |
| <i>m</i> -C <sub>6</sub> H <sub>4</sub> Cl <sub>2</sub>   | -1149.917729       | 1  | <i>o</i> -C <sub>6</sub> H <sub>4</sub> (OH) <sub>2</sub>                | -381.902283        | 0  |
| <i>p</i> -C <sub>6</sub> H <sub>4</sub> Cl <sub>2</sub>   | -1149.917362       | 0  | <i>m</i> -C <sub>6</sub> H <sub>4</sub> (OH) <sub>2</sub>                | -381.900413        | 2  |
| C <sub>6</sub> H <sub>3</sub> Cl <sub>3</sub>             | -1609.026463       | 1  | <i>p</i> -C <sub>6</sub> H <sub>4</sub> (OH) <sub>2</sub>                | -381.897781        | 3  |
| C <sub>6</sub> H <sub>2</sub> Cl <sub>4</sub>             | -2068.130396       | 0  | C <sub>6</sub> H <sub>3</sub> (OH) <sub>3</sub>                          | -457.001939        | 3  |
| C <sub>6</sub> H <sub>5</sub> Br                          | -2803.999965       | 1  | C <sub>6</sub> H <sub>2</sub> (OH) <sub>4</sub>                          | -532.102522        | 0  |
| <i>o</i> -C <sub>6</sub> H <sub>4</sub> Br <sub>2</sub>   | -5376.298296       | 1  | C <sub>6</sub> H <sub>5</sub> NH <sub>2</sub>                            | -286.949236        | 0  |
| <i>m</i> -C <sub>6</sub> H <sub>4</sub> Br <sub>2</sub>   | -5376.301326       | 1  | <i>o</i> -C <sub>6</sub> H <sub>4</sub> (NH <sub>2</sub> ) <sub>2</sub>  | -342.203045        | 0  |
| <i>p</i> -C <sub>6</sub> H <sub>4</sub> Br <sub>2</sub>   | -5376.301158       | 1  | <i>m</i> -C <sub>6</sub> H <sub>4</sub> (NH <sub>2</sub> ) <sub>2</sub>  | -342.200032        | 0  |
| C <sub>6</sub> H <sub>3</sub> Br <sub>3</sub>             | -7948.602185       | 1  | <i>p</i> -C <sub>6</sub> H <sub>4</sub> (NH <sub>2</sub> ) <sub>2</sub>  | -342.197394        | 0  |
| C <sub>6</sub> H <sub>2</sub> Br <sub>4</sub>             | -10520.896652      | 2  | C <sub>6</sub> H <sub>3</sub> (NH <sub>2</sub> ) <sub>3</sub>            | -397.450397        | 0  |
| C <sub>6</sub> H <sub>5</sub> I                           | -7148.627628       | 1  | C <sub>6</sub> H <sub>2</sub> (NH <sub>2</sub> ) <sub>4</sub>            | -452.702496        | 0  |
| <i>o</i> -C <sub>6</sub> H <sub>4</sub> I <sub>2</sub>    | -14065.553081      | 1  | C <sub>6</sub> H <sub>5</sub> OCH <sub>3</sub>                           | -345.995264        | 0  |
| <i>m</i> -C <sub>6</sub> H <sub>4</sub> I <sub>2</sub>    | -14065.556928      | 1  | <i>o</i> -C <sub>6</sub> H <sub>4</sub> (OCH <sub>3</sub> ) <sub>2</sub> | -460.288401        | 2  |
| <i>p</i> -C <sub>6</sub> H <sub>4</sub> I <sub>2</sub>    | -14065.556711      | 1  | <i>m</i> -C <sub>6</sub> H <sub>4</sub> (OCH <sub>3</sub> ) <sub>2</sub> | -460.293245        | 0  |
| C <sub>6</sub> H <sub>3</sub> I <sub>3</sub>              | -20982.485948      | 1  | <i>p</i> -C <sub>6</sub> H <sub>4</sub> (OCH <sub>3</sub> ) <sub>2</sub> | -460.290409        | 0  |
| C <sub>6</sub> H <sub>2</sub> I <sub>4</sub>              | -27899.407594      | 2  | C <sub>6</sub> H <sub>3</sub> (OCH <sub>3</sub> ) <sub>3</sub>           | -574.591672        | 2  |
| C <sub>6</sub> H <sub>5</sub> CN                          | -323.774436        | 0  | C <sub>6</sub> H <sub>2</sub> (OCH <sub>3</sub> ) <sub>4</sub>           | -688.873409        | 0  |
| <i>o</i> -C <sub>6</sub> H <sub>4</sub> (CN) <sub>2</sub> | -415.845876        | 0  | C <sub>6</sub> H <sub>5</sub> NMe <sub>2</sub>                           | -365.357468        | 0  |
| <i>m</i> -C <sub>6</sub> H <sub>4</sub> (CN) <sub>2</sub> | -415.846494        | 1  | <i>o</i> -C <sub>6</sub> H <sub>4</sub> (NMe <sub>2</sub> ) <sub>2</sub> | -499.018073        | 0  |
| <i>p</i> -C <sub>6</sub> H <sub>4</sub> (CN) <sub>2</sub> | -415.847585        | 1  | <i>m</i> -C <sub>6</sub> H <sub>4</sub> (NMe <sub>2</sub> ) <sub>2</sub> | -499.016527        | 0  |
| C <sub>6</sub> H <sub>3</sub> (CN) <sub>3</sub>           | -507.914988        | 1  | <i>p</i> -C <sub>6</sub> H <sub>4</sub> (NMe <sub>2</sub> ) <sub>2</sub> | -499.014839        | 0  |
| C <sub>6</sub> H <sub>5</sub> NO <sub>2</sub>             | -435.861861        | 0  | C <sub>6</sub> H <sub>3</sub> (NMe <sub>2</sub> ) <sub>3</sub>           | -632.675462        | 0  |

**Table S2.** RHF/6-311++G\*\* Total Energies (hartrees) and Number of Imaginary Frequencies (NI) for Substituted Benzenes that Gave Negative Frequencies when Calculated at the MP2(full)/6-311++G\*\* level of theory.

| <b>Aromatic</b>                                         | <b>E<sub>Total</sub></b> | <b>NI</b> | <b>Aromatic</b>                                                          | <b>E<sub>Total</sub></b> | <b>NI</b> |
|---------------------------------------------------------|--------------------------|-----------|--------------------------------------------------------------------------|--------------------------|-----------|
| C <sub>6</sub> H <sub>6</sub>                           | -230.756841              | 0         | <i>o</i> -C <sub>6</sub> H <sub>4</sub> I <sub>2</sub>                   | -14063.197710            | 0         |
| C <sub>6</sub> H <sub>5</sub> F                         | -329.637904              | 0         | <i>m</i> -C <sub>6</sub> H <sub>4</sub> I <sub>2</sub>                   | -14063.204912            | 0         |
| <i>o</i> -C <sub>6</sub> H <sub>4</sub> F <sub>2</sub>  | -428.511527              | 0         | <i>p</i> -C <sub>6</sub> H <sub>4</sub> I <sub>2</sub>                   | -14063.205110            | 0         |
| C <sub>6</sub> H <sub>2</sub> F <sub>4</sub>            | -626.259936              | 0         | C <sub>6</sub> H <sub>3</sub> I <sub>3</sub>                             | -20979.426872            | 0         |
| C <sub>6</sub> H <sub>5</sub> Cl                        | -689.680676              | 0         | C <sub>6</sub> H <sub>2</sub> I <sub>4</sub>                             | -27895.634663            | 0         |
| <i>o</i> -C <sub>6</sub> H <sub>4</sub> Cl <sub>2</sub> | -1148.598118             | 0         | <i>m</i> -C <sub>6</sub> H <sub>4</sub> (CN) <sub>2</sub>                | -414.260896              | 0         |
| <i>m</i> -C <sub>6</sub> H <sub>4</sub> Cl <sub>2</sub> | -1148.602802             | 0         | <i>p</i> -C <sub>6</sub> H <sub>4</sub> (CN) <sub>2</sub>                | -414.260880              | 0         |
| C <sub>6</sub> H <sub>3</sub> Cl <sub>3</sub>           | -1607.523415             | 0         | C <sub>6</sub> H <sub>3</sub> (CN) <sub>3</sub>                          | -506.006070              | 0         |
| C <sub>6</sub> H <sub>5</sub> Br                        | -2802.540575             | 0         | C <sub>6</sub> H <sub>5</sub> OH                                         | -305.640020              | 0         |
| <i>o</i> -C <sub>6</sub> H <sub>4</sub> Br <sub>2</sub> | -5374.316881             | 0         | <i>m</i> -C <sub>6</sub> H <sub>4</sub> (OH) <sub>2</sub>                | -380.524874              | 0         |
| <i>m</i> -C <sub>6</sub> H <sub>4</sub> Br <sub>2</sub> | -5374.322517             | 0         | <i>p</i> -C <sub>6</sub> H <sub>4</sub> (OH) <sub>2</sub>                | -380.51958               | 0         |
| <i>p</i> -C <sub>6</sub> H <sub>4</sub> Br <sub>2</sub> | -5374.322777             | 0         | C <sub>6</sub> H <sub>3</sub> (OH) <sub>3</sub>                          | -455.411196              | 0         |
| C <sub>6</sub> H <sub>3</sub> Br <sub>3</sub>           | -7946.102998             | 0         | <i>o</i> -C <sub>6</sub> H <sub>4</sub> (OCH <sub>3</sub> ) <sub>2</sub> | -458.573340              | 0         |
| C <sub>6</sub> H <sub>5</sub> I                         | -7146.981693             | 0         | C <sub>6</sub> H <sub>3</sub> (OCH <sub>3</sub> ) <sub>3</sub>           | -572.496213              | 0         |

**Table S3.** MP2(full)/6-311++G\*\* Total Energies (hartrees) and Number of Imaginary Frequencies (NI) for all Optimized Na<sup>+</sup>-Substituted Benzene Complexes.

| <b>Aromatic</b>                   | <b>E<sub>Total</sub></b> | <b>NI</b> | <b>Aromatic</b>                        | <b>E<sub>Total</sub></b> | <b>NI</b> |
|-----------------------------------|--------------------------|-----------|----------------------------------------|--------------------------|-----------|
| <b>C<sub>6</sub>H<sub>6</sub></b> | -393.531737              | 0         | <b>NO<sub>2</sub>2m</b>                | -801.821904              | 2         |
| <b>F1</b>                         | -492.621781              | 0         | <b>NO<sub>2</sub>2p</b>                | -801.822560              | 1         |
| <b>F2o</b>                        | -591.705379              | 0         | <b>CH<sub>3</sub>1</b>                 | -432.754284              | 0         |
| <b>F2m</b>                        | -591.710969              | 0         | <b>CH<sub>3</sub>2o</b>                | -471.976454              | 0         |
| <b>F2p</b>                        | -591.709326              | 0         | <b>CH<sub>3</sub>2m</b>                | -471.976244              | 0         |
| <b>F3</b>                         | -690.799191              | 0         | <b>CH<sub>3</sub>2p</b>                | -471.976346              | 0         |
| <b>F4</b>                         | -789.873289              | 0         | <b>CH<sub>3</sub>3</b>                 | -511.198383              | 0         |
| <b>Cl1</b>                        | -852.639986              | 0         | <b>CH<sub>3</sub>4</b>                 | -550.419974              | 0         |
| <b>Cl2o</b>                       | -1311.740849             | 0         | <b>OH1</b>                             | -468.632651              | 0         |
| <b>Cl2m</b>                       | -1311.742054             | 0         | <b>OH2o</b>                            | -543.737427              | 0         |
| <b>Cl2p</b>                       | -1311.741507             | 1         | <b>OH2m</b>                            | -543.733937              | 0         |
| <b>Cl3</b>                        | -1770.846871             | 1         | <b>OH2p</b>                            | -543.732199              | 0         |
| <b>Cl4</b>                        | -2229.948050             | 1         | <b>OH3</b>                             | -618.837857              | 0         |
| <b>Br1</b>                        | -2965.828932             | 0         | <b>OH4</b>                             | -693.937407              | 0         |
| <b>Br2o</b>                       | -5538.124476             | 1         | <b>NH<sub>2</sub>1</b>                 | -448.789669              | 0         |
| <b>Br2m</b>                       | -5538.126167             | 0         | <b>NH<sub>2</sub>2o</b>                | -504.045984              | 0         |
| <b>Br2p</b>                       | -5538.125708             | 1         | <b>NH<sub>2</sub>2m</b>                | -504.049428              | 0         |
| <b>Br3</b>                        | -8110.423571             | 0         | <b>NH<sub>2</sub>2p</b>                | -504.045378              | 0         |
| <b>Br4</b>                        | -10682.717149            | 2         | <b>NH<sub>2</sub>3</b>                 | -559.307522              | 0         |
| <b>I1</b>                         | -7310.457595             | 0         | <b>NH<sub>2</sub>4</b>                 | -614.551110              | 0         |
| <b>I2o</b>                        | -14227.381730            | 1         | <b>OCH<sub>3</sub>1</b>                | -507.832694              | 0         |
| <b>I2m</b>                        | -14227.383903            | 0         | <b>OCH<sub>3</sub>2o</b>               | -622.129753              | 0         |
| <b>I2p</b>                        | -14227.383295            | 1         | <b>OCH<sub>3</sub>2m</b>               | -622.134098              | 0         |
| <b>I3</b>                         | -21144.310855            | 0         | <b>OCH<sub>3</sub>2p</b>               | -622.130161              | 0         |
| <b>I4</b>                         | -28061.233007            | 1         | <b>OCH<sub>3</sub>3</b>                | -736.435728              | 0         |
| <b>CN1</b>                        | -485.593111              | 0         | <b>OCH<sub>3</sub>4</b>                | -850.718695              | 0         |
| <b>CN2o</b>                       | -577.651944              | 1         | <b>N(CH<sub>3</sub>)<sub>2</sub>1</b>  | -527.202845              | 0         |
| <b>CN2m</b>                       | -577.652093              | 0         | <b>N(CH<sub>3</sub>)<sub>2</sub>2o</b> | -660.864043              | 0         |
| <b>CN2p</b>                       | -577.652891              | 1         | <b>N(CH<sub>3</sub>)<sub>2</sub>2m</b> | -660.870439              | 0         |
| <b>CN3</b>                        | -669.709351              | 0         | <b>N(CH<sub>3</sub>)<sub>2</sub>2p</b> | -660.864047              | 0         |
| <b>NO<sub>2</sub>1</b>            | -597.678202              | 1         | <b>N(CH<sub>3</sub>)<sub>2</sub>3</b>  | -794.539409              | 0         |

**Table S4.** RHF/6-311++G\*\* Total Energies (hartrees) and Number of Imaginary Frequencies (NI) for Optimized Na<sup>+</sup>-Substituted Benzene Complexes that Gave Negative Frequencies when Calculated at the MP2(full)/6-311++G\*\* level of theory.

| <b>Aromatic</b> | <b>E<sub>Total</sub></b> | <b>NI</b> | <b>Aromatic</b>         | <b>E<sub>Total</sub></b> | <b>NI</b> |
|-----------------|--------------------------|-----------|-------------------------|--------------------------|-----------|
| <b>Cl2p</b>     | -1310.290332             | 0         | <b>I2p</b>              | -14224.895188            | 0         |
| <b>Cl3</b>      | -1769.205467             | 0         | <b>I4</b>               | -28057.320143            | 0         |
| <b>Cl4</b>      | -2228.112814             | 0         | <b>CN2o</b>             | -575.980883              | 0         |
| <b>Br2o</b>     | -5536.006541             | 0         | <b>CN2p</b>             | -575.930854              | 0         |
| <b>Br2p</b>     | -5536.010873             | 0         | <b>NO<sub>2</sub>1</b>  | -595.965182              | 1         |
| <b>Br4</b>      | -10679.553090            | 0         | <b>NO<sub>2</sub>2m</b> | -799.514159              | 0         |
| <b>I2o</b>      | -14224.889607            | 0         | <b>NO<sub>2</sub>2p</b> | -799.468216              | 1         |

**Table S5.** MP2(full)/6-311++G\*\* Basis Set Superposition Error Corrected Total Energies (hartrees) for the Optimized Na<sup>+</sup>-Substituted Benzene Complexes.

| <b>Aromatic</b>                   | <b>E<sub>Total</sub></b> | <b>Aromatic</b>                        | <b>E<sub>Total</sub></b> |
|-----------------------------------|--------------------------|----------------------------------------|--------------------------|
| <b>C<sub>6</sub>H<sub>6</sub></b> | -393.525943              | <b>NO<sub>2</sub>2m</b>                | -801.816819              |
| <b>F1</b>                         | -492.616403              | <b>NO<sub>2</sub>2p</b>                | -801.817451              |
| <b>F2o</b>                        | -591.700206              | <b>CH<sub>3</sub>1</b>                 | -432.748439              |
| <b>F2m</b>                        | -591.705948              | <b>CH<sub>3</sub>2o</b>                | -471.970308              |
| <b>F2p</b>                        | -591.704247              | <b>CH<sub>3</sub>2m</b>                | -471.970330              |
| <b>F3</b>                         | -690.794453              | <b>CH<sub>3</sub>2p</b>                | -471.970275              |
| <b>F4</b>                         | -789.868594              | <b>CH<sub>3</sub>3</b>                 | -511.192410              |
| <b>Cl1</b>                        | -852.630708              | <b>CH<sub>3</sub>4</b>                 | -550.413352              |
| <b>Cl2o</b>                       | -1311.733734             | <b>OH1</b>                             | -468.627009              |
| <b>Cl2m</b>                       | -1311.735429             | <b>OH2o</b>                            | -543.731657              |
| <b>Cl2p</b>                       | -1311.734537             | <b>OH2m</b>                            | -543.728435              |
| <b>Cl3</b>                        | -1770.839520             | <b>OH2p</b>                            | -543.726485              |
| <b>Cl4</b>                        | -2229.937228             | <b>OH3</b>                             | -618.832311              |
| <b>Br1</b>                        | -2965.822801             | <b>OH4</b>                             | -693.931554              |
| <b>Br2o</b>                       | -5538.117762             | <b>NH<sub>2</sub>1</b>                 | -448.783818              |
| <b>Br2m</b>                       | -5538.120032             | <b>NH<sub>2</sub>2o</b>                | -504.040109              |
| <b>Br2p</b>                       | -5538.119217             | <b>NH<sub>2</sub>2m</b>                | -504.043671              |
| <b>Br3</b>                        | -8110.417351             | <b>NH<sub>2</sub>2p</b>                | -504.039305              |
| <b>Br4</b>                        | -10682.709553            | <b>NH<sub>2</sub>3</b>                 | -559.300587              |
| <b>I1</b>                         | -7310.451271             | <b>NH<sub>2</sub>4</b>                 | -614.544891              |
| <b>I2o</b>                        | -14227.374648            | <b>OCH<sub>3</sub>1</b>                | -507.826948              |
| <b>I2m</b>                        | -14227.377256            | <b>OCH<sub>3</sub>2o</b>               | -622.123554              |
| <b>I2p</b>                        | -14227.376430            | <b>OCH<sub>3</sub>2m</b>               | -622.128175              |
| <b>I3</b>                         | -21144.303948            | <b>OCH<sub>3</sub>2p</b>               | -622.124191              |
| <b>I4</b>                         | -28061.224761            | <b>OCH<sub>3</sub>3</b>                | -736.429646              |
| <b>CN1</b>                        | -485.588001              | <b>OCH<sub>3</sub>4</b>                | -850.712237              |
| <b>CN2o</b>                       | -577.646989              | <b>N(CH<sub>3</sub>)<sub>2</sub>1</b>  | -527.196814              |
| <b>CN2m</b>                       | -577.647464              | <b>N(CH<sub>3</sub>)<sub>2</sub>2o</b> | -660.858015              |
| <b>CN2p</b>                       | -577.648031              | <b>N(CH<sub>3</sub>)<sub>2</sub>2m</b> | -660.864104              |
| <b>CN3</b>                        | -669.705191              | <b>N(CH<sub>3</sub>)<sub>2</sub>2p</b> | -660.857945              |
| <b>NO<sub>2</sub>1</b>            | -597.672836              | <b>N(CH<sub>3</sub>)<sub>2</sub>3</b>  | -794.532820              |

**Table S6.** MP2(full)/6-311++G\*\* Optimized Structures for All Substituted Benzenes.

| C <sub>6</sub> H <sub>6</sub>                          |           |           |           |                                                        |           |           |           |
|--------------------------------------------------------|-----------|-----------|-----------|--------------------------------------------------------|-----------|-----------|-----------|
| 6                                                      | 0.000000  | 1.398984  | -0.000055 |                                                        |           |           |           |
| 6                                                      | 0.000000  | -1.398984 | -0.000055 |                                                        |           |           |           |
| 6                                                      | -1.211554 | 0.699492  | -0.000055 |                                                        |           |           |           |
| 6                                                      | 1.211554  | 0.699492  | -0.000055 |                                                        |           |           |           |
| 6                                                      | -1.211554 | -0.699492 | -0.000055 |                                                        |           |           |           |
| 6                                                      | 1.211554  | -0.699492 | -0.000055 |                                                        |           |           |           |
| 1                                                      | 0.000000  | 2.485269  | 0.000329  |                                                        |           |           |           |
| 1                                                      | -2.152305 | 1.242633  | 0.000329  |                                                        |           |           |           |
| 1                                                      | -2.152305 | -1.242633 | 0.000329  |                                                        |           |           |           |
| 1                                                      | 0.000000  | -2.485269 | 0.000329  |                                                        |           |           |           |
| 1                                                      | 2.152305  | -1.242633 | 0.000329  |                                                        |           |           |           |
| 1                                                      | 2.152305  | 1.242633  | 0.000329  |                                                        |           |           |           |
| C <sub>6</sub> H <sub>5</sub> F                        |           |           |           | <i>o</i> -C <sub>6</sub> H <sub>4</sub> F <sub>2</sub> |           |           |           |
| 6                                                      | -0.930715 | 0.000000  | 0.000000  | 6                                                      | -0.537240 | -0.697187 | 0.000022  |
| 6                                                      | -0.262331 | -1.219138 | -0.000002 | 6                                                      | -0.537242 | 0.697189  | -0.000023 |
| 6                                                      | 1.135963  | -1.210303 | 0.000003  | 6                                                      | 0.659618  | 1.402184  | 0.000034  |
| 6                                                      | 1.837225  | 0.000000  | -0.000004 | 6                                                      | 1.868552  | 0.698894  | -0.000042 |
| 6                                                      | 1.135961  | 1.210303  | 0.000005  | 6                                                      | 1.868555  | -0.698894 | 0.000048  |
| 6                                                      | -0.262333 | 1.219139  | -0.000004 | 6                                                      | 0.659620  | -1.402180 | -0.000043 |
| 9                                                      | -2.281575 | -0.000002 | 0.000000  | 9                                                      | -1.708616 | -1.350743 | 0.000007  |
| 1                                                      | -0.830611 | -2.143114 | 0.000001  | 9                                                      | -1.708622 | 1.350737  | -0.000004 |
| 1                                                      | 1.675122  | -2.152843 | 0.000001  | 1                                                      | 0.626562  | 2.486656  | 0.000011  |
| 1                                                      | 2.922541  | 0.000001  | -0.000002 | 1                                                      | 2.805418  | 1.246172  | -0.000003 |
| 1                                                      | 1.675118  | 2.152844  | 0.000003  | 1                                                      | 2.805423  | -1.246167 | 0.000007  |
| 1                                                      | -0.830616 | 2.143114  | -0.000001 | 1                                                      | 0.626559  | -2.486653 | -0.000014 |
| <i>m</i> -C <sub>6</sub> H <sub>4</sub> F <sub>2</sub> |           |           |           | <i>p</i> -C <sub>6</sub> H <sub>4</sub> F <sub>2</sub> |           |           |           |
| 6                                                      | 1.185923  | -0.305673 | 0.000000  | 6                                                      | 0.000000  | 0.000000  | 1.370446  |
| 6                                                      | 0.000000  | -1.031716 | 0.000025  | 9                                                      | 0.000000  | 0.000000  | 2.719667  |
| 6                                                      | -1.185924 | -0.305671 | 0.000000  | 6                                                      | 0.000000  | 1.217866  | 0.698807  |
| 6                                                      | -1.217112 | 1.084644  | 0.000005  | 6                                                      | 0.000000  | -1.217866 | 0.698807  |
| 6                                                      | 0.000000  | 1.772292  | -0.000002 | 6                                                      | 0.000000  | 0.000000  | -1.370446 |
| 6                                                      | 1.217110  | 1.084641  | 0.000002  | 6                                                      | 0.000000  | -1.217866 | -0.698807 |
| 9                                                      | 2.349153  | -0.985444 | -0.000011 | 6                                                      | 0.000000  | 1.217866  | -0.698807 |
| 1                                                      | 0.000000  | -2.115281 | 0.000024  | 9                                                      | 0.000000  | 0.000000  | -2.719667 |
| 9                                                      | -2.349151 | -0.985448 | -0.000010 | 1                                                      | 0.000000  | 2.144018  | 1.263108  |
| 1                                                      | -2.169492 | 1.602283  | -0.000017 | 1                                                      | 0.000000  | -2.144018 | 1.263108  |
| 1                                                      | 0.000001  | 2.857646  | 0.000010  | 1                                                      | 0.000000  | -2.144018 | -1.263108 |
| 1                                                      | 2.169490  | 1.602279  | -0.000006 | 1                                                      | 0.000000  | 2.144018  | -1.263108 |
| C <sub>6</sub> H <sub>3</sub> F <sub>3</sub>           |           |           |           | C <sub>6</sub> H <sub>2</sub> F <sub>4</sub>           |           |           |           |
| 6                                                      | 0.000000  | 1.367731  | 0.000000  | 6                                                      | 1.197681  | 0.696803  | -0.000002 |

|                |           |           |           |                |           |           |           |
|----------------|-----------|-----------|-----------|----------------|-----------|-----------|-----------|
| 9              | 0.000000  | 2.712043  | 0.000000  | 6              | 1.197691  | -0.696808 | 0.000005  |
| 6              | -1.184490 | -0.683866 | 0.000000  | 6              | 0.000005  | -1.401831 | 0.000014  |
| 6              | 1.184490  | -0.683866 | 0.000000  | 6              | -1.197677 | -0.696808 | -0.000004 |
| 9              | -2.348698 | -1.356022 | 0.000000  | 6              | -1.197684 | 0.696808  | 0.000006  |
| 9              | 2.348698  | -1.356022 | 0.000000  | 6              | -0.000007 | 1.401825  | -0.000003 |
| 6              | 0.000000  | -1.412191 | 0.000000  | 9              | 2.361682  | 1.356771  | -0.000013 |
| 1              | 0.000000  | -2.495070 | 0.000000  | 9              | 2.361705  | -1.356755 | 0.000005  |
| 6              | 1.222993  | 0.706095  | 0.000000  | 1              | -0.000008 | -2.485826 | 0.000039  |
| 6              | -1.222993 | 0.706095  | 0.000000  | 9              | -2.361693 | -1.356751 | -0.000022 |
| 1              | 2.160794  | 1.247535  | 0.000000  | 9              | -2.361703 | 1.356743  | 0.000015  |
| 1              | -2.160794 | 1.247535  | 0.000000  | 1              | 0.000033  | 2.485820  | -0.000001 |
|                |           |           |           |                |           |           |           |
| $C_6H_5Cl$     |           |           |           | $o-C_6H_4Cl_2$ |           |           |           |
| 6              | -0.515093 | -0.000009 | -0.000079 | 6              | -0.036963 | -0.701381 | 0.000032  |
| 6              | 0.172240  | -1.215837 | 0.000081  | 6              | -0.036909 | 0.701387  | -0.000010 |
| 6              | 1.569999  | -1.208985 | -0.000042 | 6              | 1.178729  | 1.393771  | 0.000004  |
| 6              | 2.272779  | 0.000016  | 0.000092  | 6              | 2.388164  | 0.699035  | 0.000000  |
| 6              | 1.569962  | 1.208985  | -0.000044 | 6              | 2.388103  | -0.699141 | 0.000009  |
| 6              | 0.172198  | 1.215848  | 0.000083  | 6              | 1.178628  | -1.393825 | -0.000030 |
| 17             | -2.250762 | -0.000009 | -0.000041 | 17             | -1.509671 | -1.602443 | 0.000000  |
| 1              | -0.381333 | -2.149186 | 0.000039  | 17             | -1.509584 | 1.602510  | -0.000003 |
| 1              | 2.107383  | -2.152795 | 0.000009  | 1              | 1.161154  | 2.478923  | 0.000020  |
| 1              | 3.358414  | 0.000035  | 0.000082  | 1              | 3.323387  | 1.250114  | 0.000000  |
| 1              | 2.107347  | 2.152793  | 0.000000  | 1              | 3.323294  | -1.250279 | -0.000012 |
| 1              | -0.381371 | 2.149199  | 0.000040  | 1              | 1.160983  | -2.478977 | 0.000006  |
|                |           |           |           |                |           |           |           |
| $m-C_6H_4Cl_2$ |           |           |           | $p-C_6H_4Cl_2$ |           |           |           |
| 6              | -1.200493 | -0.006832 | -0.000003 | 6              | 0.000000  | 0.000000  | 1.389933  |
| 6              | 0.000019  | -0.719393 | -0.000025 | 17             | 0.000000  | 0.000000  | 3.122765  |
| 6              | 1.200528  | -0.006805 | 0.000018  | 6              | 0.000000  | 1.213237  | 0.698107  |
| 6              | 1.215733  | 1.389714  | -0.000009 | 6              | 0.000000  | -1.213237 | 0.698107  |
| 6              | -0.000066 | 2.078144  | -0.000019 | 6              | 0.000000  | 0.000000  | -1.389933 |
| 6              | -1.215821 | 1.389683  | 0.000023  | 6              | 0.000000  | -1.213237 | -0.698107 |
| 17             | -2.696742 | -0.880929 | 0.000000  | 6              | 0.000000  | 1.213237  | -0.698107 |
| 17             | 2.696786  | -0.880887 | 0.000002  | 17             | 0.000000  | 0.000000  | -3.122765 |
| 1              | 0.000009  | -1.803793 | 0.000029  | 1              | 0.000000  | 2.149842  | 1.246102  |
| 1              | 2.160876  | 1.921816  | 0.000002  | 1              | 0.000000  | -2.149842 | 1.246102  |
| 1              | -0.000014 | 3.164072  | 0.000028  | 1              | 0.000000  | -2.149842 | -1.246102 |
| 1              | -2.161018 | 1.921696  | -0.000004 | 1              | 0.000000  | 2.149842  | -1.246102 |
|                |           |           |           |                |           |           |           |
| $C_6H_3Cl_3$   |           |           |           | $C_6H_2Cl_4$   |           |           |           |
| 6              | 0.000000  | 1.383926  | 0.000000  | 6              | -1.214718 | 0.701070  | -0.022423 |
| 17             | -0.000493 | 3.114177  | 0.000000  | 6              | -1.214696 | -0.701071 | 0.022680  |
| 6              | -1.198376 | -0.692242 | 0.000000  | 6              | 0.000018  | -1.386746 | -0.006869 |
| 6              | 1.198774  | -0.691943 | 0.000000  | 6              | 1.214724  | -0.701078 | 0.022631  |
| 17             | -2.697248 | -1.556740 | 0.000000  | 6              | 1.214693  | 0.701078  | -0.022372 |

|                         |           |           |           |                         |           |           |           |
|-------------------------|-----------|-----------|-----------|-------------------------|-----------|-----------|-----------|
| 17                      | 2.697344  | -1.557000 | 0.000000  | 6                       | -0.000017 | 1.386743  | 0.007334  |
| 6                       | 0.000284  | -1.408025 | 0.000000  | 17                      | -2.678899 | 1.607610  | 0.002831  |
| 1                       | 0.000226  | -2.492040 | 0.000000  | 17                      | -2.678839 | -1.607655 | -0.003015 |
| 6                       | 1.218943  | 0.703717  | 0.000000  | 1                       | 0.000017  | -2.471252 | 0.013951  |
| 6                       | -1.218689 | 0.703484  | 0.000000  | 17                      | 2.678903  | -1.607622 | -0.003185 |
| 1                       | 2.158098  | 1.245155  | 0.000000  | 17                      | 2.678834  | 1.607669  | 0.003000  |
| 1                       | -2.157196 | 1.245961  | 0.000000  | 1                       | -0.000032 | 2.471245  | -0.013544 |
|                         |           |           |           |                         |           |           |           |
| $C_6H_5Br$              |           |           |           | <i>o</i> - $C_6H_4Br_2$ |           |           |           |
| 6                       | 0.091368  | -0.000001 | 0.000010  | 6                       | -0.533386 | 0.701983  | 0.000112  |
| 6                       | 0.777080  | 1.217670  | -0.000011 | 6                       | -0.533349 | -0.702007 | -0.000115 |
| 6                       | 2.175444  | 1.209132  | 0.000010  | 6                       | -1.751433 | -1.394725 | 0.000084  |
| 6                       | 2.877941  | 0.000001  | -0.000007 | 6                       | -2.960576 | -0.699088 | -0.000033 |
| 6                       | 2.175445  | -1.209131 | 0.000003  | 6                       | -2.960612 | 0.698935  | 0.000032  |
| 6                       | 0.777082  | -1.217671 | -0.000003 | 6                       | -1.751503 | 1.394638  | -0.000090 |
| 35                      | -1.802594 | 0.000000  | 0.000000  | 35                      | 1.060183  | 1.711120  | 0.000006  |
| 1                       | 0.227402  | 2.153221  | 0.000003  | 35                      | 1.060273  | -1.711067 | -0.000006 |
| 1                       | 2.713080  | 2.152918  | -0.000003 | 1                       | -1.739570 | -2.479852 | 0.000088  |
| 1                       | 3.963641  | -0.000001 | 0.000004  | 1                       | -3.895734 | -1.250638 | 0.000046  |
| 1                       | 2.713086  | -2.152914 | 0.000001  | 1                       | -3.895797 | 1.250436  | -0.000029 |
| 1                       | 0.227406  | -2.153224 | -0.000005 | 1                       | -1.739682 | 2.479766  | -0.000065 |
|                         |           |           |           |                         |           |           |           |
| <i>m</i> - $C_6H_4Br_2$ |           |           |           | <i>p</i> - $C_6H_4Br_2$ |           |           |           |
| 6                       | -1.199646 | 0.331393  | -0.000078 | 6                       | 0.000000  | 0.000000  | 1.389222  |
| 6                       | -0.000003 | -0.385465 | 0.000081  | 35                      | 0.000000  | 0.000000  | 3.279906  |
| 6                       | 1.199643  | 0.331386  | -0.000093 | 6                       | 0.000000  | 1.214969  | 0.698715  |
| 6                       | 1.216792  | 1.728698  | 0.000064  | 6                       | 0.000000  | -1.214969 | 0.698715  |
| 6                       | 0.000007  | 2.416521  | -0.000046 | 6                       | 0.000000  | 0.000000  | -1.389222 |
| 6                       | -1.216785 | 1.728703  | 0.000049  | 6                       | 0.000000  | -1.214969 | -0.698715 |
| 35                      | -2.833819 | -0.620989 | 0.000000  | 6                       | 0.000000  | 1.214969  | -0.698715 |
| 1                       | -0.000014 | -1.469811 | 0.000042  | 35                      | 0.000000  | 0.000000  | -3.279906 |
| 35                      | 2.833817  | -0.620991 | 0.000000  | 1                       | 0.000000  | 2.153874  | 1.242863  |
| 1                       | 2.159880  | 2.264483  | 0.000014  | 1                       | 0.000000  | -2.153874 | 1.242863  |
| 1                       | 0.000015  | 3.502699  | 0.000010  | 1                       | 0.000000  | -2.153874 | -1.242863 |
| 1                       | -2.159867 | 2.264495  | 0.000025  | 1                       | 0.000000  | 2.153874  | -1.242863 |
|                         |           |           |           |                         |           |           |           |
| $C_6H_3Br_3$            |           |           |           | $C_6H_2Br_4$            |           |           |           |
| 6                       | 0.000000  | 0.000000  | 1.383470  | 6                       | 0.000000  | 0.000000  | 1.389196  |
| 35                      | 0.000000  | 0.000000  | 3.272685  | 1                       | 0.000000  | 0.000000  | 2.473951  |
| 6                       | 0.000000  | 1.198113  | -0.691693 | 6                       | 0.000000  | 1.217295  | 0.702179  |
| 6                       | 0.000000  | -1.198113 | -0.691693 | 6                       | 0.000000  | -1.217295 | 0.702179  |
| 35                      | 0.000000  | 2.834292  | -1.636358 | 6                       | 0.000000  | 0.000000  | -1.389196 |
| 35                      | 0.000000  | -2.834292 | -1.636358 | 6                       | 0.000000  | -1.217295 | -0.702179 |
| 6                       | 0.000000  | 0.000000  | -1.410597 | 6                       | 0.000000  | 1.217295  | -0.702179 |
| 1                       | 0.000000  | 0.000000  | -2.494490 | 1                       | 0.000000  | 0.000000  | -2.473951 |
| 6                       | 0.000000  | -1.221685 | 0.705346  | 35                      | 0.000000  | 2.802557  | 1.716397  |



|                        |           |           |           |                        |           |           |           |
|------------------------|-----------|-----------|-----------|------------------------|-----------|-----------|-----------|
| 6                      | 0.000000  | 1.221685  | 0.705346  | 35                     | 0.000000  | -2.802557 | 1.716397  |
| 1                      | 0.000000  | -2.160426 | 1.247231  | 35                     | 0.000000  | -2.802557 | -1.716397 |
| 1                      | 0.000000  | 2.160426  | 1.247231  | 35                     | 0.000000  | 2.802557  | -1.716397 |
| $C_6H_5I$              |           |           |           | <i>o</i> - $C_6H_4I_2$ |           |           |           |
| 6                      | -0.557813 | 0.000005  | -0.000036 | 6                      | -0.703576 | 0.909553  | 0.000077  |
| 6                      | -1.248170 | -1.217409 | 0.000053  | 6                      | 0.703554  | 0.909568  | -0.000087 |
| 6                      | -2.646852 | -1.208650 | -0.000047 | 6                      | 1.392991  | 2.133637  | 0.000095  |
| 6                      | -3.349701 | -0.000005 | 0.000037  | 6                      | 0.698633  | 3.343276  | -0.000014 |
| 6                      | -2.646858 | 1.208647  | -0.000048 | 6                      | -0.698745 | 3.343259  | 0.000013  |
| 6                      | -1.248174 | 1.217414  | 0.000054  | 6                      | -1.393053 | 2.133595  | -0.000092 |
| 53                     | 1.554746  | 0.000000  | -0.000002 | 53                     | -1.877402 | -0.843959 | 0.000008  |
| 1                      | -0.706250 | -2.157463 | 0.000044  | 53                     | 1.877428  | -0.843916 | -0.000007 |
| 1                      | -3.184110 | -2.152903 | -0.000027 | 1                      | 2.478121  | 2.132295  | 0.000125  |
| 1                      | -4.435391 | -0.000007 | 0.000004  | 1                      | 1.251673  | 4.277777  | 0.000034  |
| 1                      | -3.184120 | 2.152897  | -0.000027 | 1                      | -1.251815 | 4.277743  | -0.000023 |
| 1                      | -0.706258 | 2.157471  | 0.000044  | 1                      | -2.478182 | 2.132202  | -0.000126 |
| <i>m</i> - $C_6H_4I_2$ |           |           |           | <i>p</i> - $C_6H_4I_2$ |           |           |           |
| 6                      | 1.203430  | 0.563630  | 0.000001  | 6                      | 0.000000  | 0.000000  | 1.394615  |
| 6                      | 0.000007  | -0.151798 | 0.000074  | 53                     | 0.000000  | 0.000000  | 3.504098  |
| 6                      | -1.203425 | 0.563617  | 0.000003  | 6                      | 0.000000  | 1.214422  | 0.699162  |
| 6                      | -1.217049 | 1.962901  | 0.000016  | 6                      | 0.000000  | -1.214422 | 0.699162  |
| 6                      | -0.000001 | 2.650819  | -0.000064 | 6                      | 0.000000  | 0.000000  | -1.394615 |
| 6                      | 1.217054  | 1.962912  | 0.000015  | 6                      | 0.000000  | -1.214422 | -0.699162 |
| 53                     | 3.028505  | -0.498358 | -0.000005 | 6                      | 0.000000  | 1.214422  | -0.699162 |
| 53                     | -3.028507 | -0.498356 | -0.000002 | 53                     | 0.000000  | 0.000000  | -3.504098 |
| 1                      | 0.000013  | -1.236102 | 0.000115  | 1                      | 0.000000  | 2.158084  | 1.235407  |
| 1                      | -2.156020 | 2.505981  | -0.000002 | 1                      | 0.000000  | -2.158084 | 1.235407  |
| 1                      | -0.000005 | 3.737441  | -0.000078 | 1                      | 0.000000  | -2.158084 | -1.235407 |
| 1                      | 2.156023  | 2.505995  | -0.000006 | 1                      | 0.000000  | 2.158084  | -1.235407 |
| $C_6H_3I_3$            |           |           |           | $C_6H_2I_4$            |           |           |           |
| 6                      | 0.000000  | 1.387558  | 0.000000  | 6                      | 0.000000  | 0.000000  | 1.386640  |
| 53                     | 0.000000  | 3.498079  | 0.000000  | 1                      | 0.000000  | 0.000000  | 2.471292  |
| 6                      | 1.201660  | -0.693779 | 0.000000  | 6                      | 0.000000  | 1.223476  | 0.703541  |
| 6                      | -1.201660 | -0.693779 | 0.000000  | 6                      | 0.000000  | -1.223476 | 0.703541  |
| 53                     | 3.029425  | -1.749039 | 0.000000  | 6                      | 0.000000  | 0.000000  | -1.386640 |
| 53                     | -3.029425 | -1.749039 | 0.000000  | 6                      | 0.000000  | -1.223476 | -0.703541 |
| 6                      | 0.000000  | -1.411350 | 0.000000  | 6                      | 0.000000  | 1.223476  | -0.703541 |
| 1                      | 0.000000  | -2.495415 | 0.000000  | 1                      | 0.000000  | 0.000000  | -2.471292 |
| 6                      | -1.222265 | 0.705675  | 0.000000  | 53                     | 0.000000  | 2.968114  | 1.883533  |
| 6                      | 1.222265  | 0.705675  | 0.000000  | 53                     | 0.000000  | -2.968114 | 1.883533  |
| 1                      | -2.161093 | 1.247707  | 0.000000  | 53                     | 0.000000  | -2.968114 | -1.883533 |
| 1                      | 2.161093  | 1.247707  | 0.000000  | 53                     | 0.000000  | 2.968114  | -1.883533 |

| $C_6H_5CN$       |           |           |           | $o-C_6H_4(CN)_2$ |           |           |           |
|------------------|-----------|-----------|-----------|------------------|-----------|-----------|-----------|
| 6                | -0.607338 | -0.000003 | 0.015890  | 6                | 0.102078  | 0.705788  | -0.024574 |
| 6                | 0.090273  | -1.218904 | -0.006209 | 6                | 0.102078  | -0.705788 | 0.024572  |
| 6                | 1.486053  | -1.211669 | 0.008252  | 6                | -1.116830 | -1.401582 | 0.001789  |
| 6                | 2.185231  | 0.000004  | -0.013029 | 6                | -2.322506 | -0.699876 | 0.013580  |
| 6                | 1.486047  | 1.211672  | 0.008251  | 6                | -2.322506 | 0.699876  | -0.013579 |
| 6                | 0.090267  | 1.218901  | -0.006207 | 6                | -1.116830 | 1.401582  | -0.001789 |
| 6                | -2.042126 | -0.000005 | 0.003221  | 6                | 1.336083  | 1.432129  | 0.000947  |
| 1                | -0.461765 | -2.153595 | 0.002491  | 6                | 1.336083  | -1.432129 | -0.000950 |
| 1                | 2.027309  | -2.152901 | -0.003675 | 1                | -1.104823 | -2.486855 | 0.018855  |
| 1                | 3.271101  | 0.000006  | -0.006750 | 1                | -3.261125 | -1.245297 | 0.006949  |
| 1                | 2.027299  | 2.152908  | -0.003675 | 1                | -3.261124 | 1.245297  | -0.006947 |
| 1                | -0.461776 | 2.153589  | 0.002492  | 1                | -1.104823 | 2.486855  | -0.018855 |
| 7                | -3.218944 | 0.000003  | -0.007414 | 7                | 2.339000  | 2.049307  | 0.015583  |
|                  |           |           |           | 7                | 2.339000  | -2.049307 | -0.015580 |
| $m-C_6H_4(CN)_2$ |           |           |           | $p-C_6H_4(CN)_2$ |           |           |           |
| 6                | -1.208166 | -0.054473 | 0.000033  | 6                | 1.395385  | 0.000011  | 0.000197  |
| 6                | 0.000053  | -0.765172 | 0.000009  | 6                | 0.696335  | 1.219491  | -0.000065 |
| 6                | 1.208161  | -0.054395 | -0.000012 | 6                | -0.696260 | 1.219430  | 0.000077  |
| 6                | 1.213019  | 1.350120  | -0.000026 | 6                | -1.395461 | 0.000061  | -0.000189 |
| 6                | 0.000035  | 2.041769  | -0.000002 | 6                | -0.696220 | -1.219328 | 0.000097  |
| 6                | -1.212889 | 1.350073  | 0.000018  | 6                | 0.696150  | -1.219454 | -0.000092 |
| 6                | -2.451254 | -0.771812 | 0.000044  | 6                | 2.829140  | 0.000092  | 0.000109  |
| 1                | 0.000096  | -1.850542 | 0.000017  | 1                | 1.246570  | 2.155165  | 0.000017  |
| 6                | 2.451183  | -0.771826 | -0.000024 | 1                | -1.246506 | 2.155097  | 0.000002  |
| 1                | 2.158175  | 1.883801  | -0.000047 | 6                | -2.829105 | -0.000017 | -0.000087 |
| 1                | 0.000015  | 3.127392  | -0.000011 | 1                | -1.246475 | -2.154988 | 0.000003  |
| 1                | -2.158027 | 1.883785  | 0.000038  | 1                | 1.246383  | -2.155131 | 0.000036  |
| 7                | -3.472262 | -1.356357 | -0.000055 | 7                | 4.006265  | -0.000177 | -0.000117 |
| 7                | 3.472104  | -1.356520 | 0.000021  | 7                | -4.006230 | -0.000089 | 0.000070  |
| $C_6H_3(CN)_3$   |           |           |           |                  |           |           |           |
| 6                | 1.120336  | -0.832412 | 0.000064  |                  |           |           |           |
| 6                | 1.292125  | 0.558962  | 0.000078  |                  |           |           |           |
| 6                | 0.160537  | 1.386373  | 0.000093  |                  |           |           |           |
| 6                | -1.130381 | 0.839751  | 0.000134  |                  |           |           |           |
| 6                | -1.281166 | -0.553787 | 0.000090  |                  |           |           |           |
| 6                | -0.162097 | -1.398359 | 0.000071  |                  |           |           |           |
| 6                | 2.272793  | -1.687942 | -0.000027 |                  |           |           |           |
| 1                | 2.288334  | 0.989856  | 0.000048  |                  |           |           |           |
| 6                | 0.325380  | 2.811888  | -0.000015 |                  |           |           |           |
| 1                | -2.001629 | 1.487098  | 0.000163  |                  |           |           |           |
| 6                | -2.598247 | -1.124013 | -0.000018 |                  |           |           |           |
| 1                | -0.287313 | -2.476449 | 0.000035  |                  |           |           |           |
| 7                | 3.217628  | -2.389002 | -0.000117 |                  |           |           |           |

|                    |           |           |           |                    |           |           |           |
|--------------------|-----------|-----------|-----------|--------------------|-----------|-----------|-----------|
| 7                  | 0.460638  | 3.980579  | -0.000164 |                    |           |           |           |
| 7                  | -3.677562 | -1.592045 | -0.000157 |                    |           |           |           |
| $C_6H_5NO_2$       |           |           |           |                    |           |           |           |
| 6                  | 0.244685  | 0.000000  | -0.000005 |                    |           |           |           |
| 6                  | -0.422182 | -1.218326 | -0.108948 |                    |           |           |           |
| 6                  | -1.819053 | -1.206526 | -0.112740 |                    |           |           |           |
| 6                  | -2.518485 | 0.000000  | 0.000005  |                    |           |           |           |
| 6                  | -1.819052 | 1.206527  | 0.112732  |                    |           |           |           |
| 6                  | -0.422182 | 1.218325  | 0.108955  |                    |           |           |           |
| 7                  | 1.718337  | 0.000000  | 0.000000  |                    |           |           |           |
| 1                  | 0.143372  | -2.139694 | -0.185609 |                    |           |           |           |
| 1                  | -2.360717 | -2.142892 | -0.204897 |                    |           |           |           |
| 1                  | -3.604217 | 0.000001  | 0.000001  |                    |           |           |           |
| 1                  | -2.360715 | 2.142893  | 0.204899  |                    |           |           |           |
| 1                  | 0.143373  | 2.139693  | 0.185608  |                    |           |           |           |
| 8                  | 2.284260  | 1.053610  | -0.290520 |                    |           |           |           |
| 8                  | 2.284259  | -1.053610 | 0.290522  |                    |           |           |           |
| $m-C_6H_4(NO_2)_2$ |           |           |           | $p-C_6H_4(NO_2)_2$ |           |           |           |
| 6                  | 1.182172  | 0.151807  | -0.015829 | 6                  | -1.365326 | 0.000000  | -0.000004 |
| 6                  | 0.000000  | -0.580473 | 0.000047  | 6                  | -0.697044 | -1.224085 | 0.003907  |
| 6                  | -1.182172 | 0.151810  | 0.015804  | 6                  | 0.697044  | -1.224084 | -0.004109 |
| 6                  | -1.215326 | 1.543931  | 0.010539  | 6                  | 1.365326  | 0.000000  | 0.000004  |
| 6                  | 0.000000  | 2.233743  | -0.000181 | 6                  | 0.697044  | 1.224084  | 0.004113  |
| 6                  | 1.215326  | 1.543929  | -0.010790 | 6                  | -0.697044 | 1.224085  | -0.003911 |
| 7                  | 2.460014  | -0.588627 | -0.039585 | 7                  | -2.838749 | 0.000000  | -0.000008 |
| 1                  | 0.000000  | -1.663368 | 0.000135  | 1                  | -1.262295 | -2.148696 | 0.016516  |
| 7                  | -2.460014 | -0.588621 | 0.039681  | 1                  | 1.262295  | -2.148694 | -0.016871 |
| 1                  | -2.167250 | 2.061952  | 0.012391  | 7                  | 2.838749  | 0.000000  | 0.000009  |
| 1                  | 0.000000  | 3.319038  | -0.000269 | 1                  | 1.262295  | 2.148694  | 0.016879  |
| 1                  | 2.167250  | 2.061950  | -0.012726 | 1                  | -1.262295 | 2.148696  | -0.016524 |
| 8                  | 3.463791  | 0.015855  | 0.332630  | 8                  | -3.401160 | 1.034130  | -0.358606 |
| 8                  | 2.425498  | -1.753820 | -0.429623 | 8                  | -3.401162 | -1.034130 | 0.358586  |
| 8                  | -2.425498 | -1.753750 | 0.429909  | 8                  | 3.401162  | -1.034070 | -0.358759 |
| 8                  | -3.463790 | 0.015801  | -0.332634 | 8                  | 3.401160  | 1.034070  | 0.358779  |
| $C_6H_5CH_3$       |           |           |           | $o-C_6H_4(CH_3)_2$ |           |           |           |
| 6                  | -0.000339 | 0.915390  | 0.000000  | 6                  | 0.478533  | -0.705382 | -0.010310 |
| 6                  | -0.008489 | 0.197206  | 1.204472  | 6                  | 0.478533  | 0.705383  | 0.010310  |
| 6                  | -0.008489 | -1.201118 | 1.208152  | 6                  | -0.745568 | 1.387631  | -0.002740 |
| 6                  | -0.010696 | -1.905259 | 0.000000  | 6                  | -1.961854 | 0.698286  | 0.011760  |
| 6                  | -0.008489 | -1.201118 | -1.208152 | 6                  | -1.961854 | -0.698287 | -0.011759 |
| 6                  | -0.008489 | 0.197206  | -1.204472 | 6                  | -0.745567 | -1.387631 | 0.002738  |
| 6                  | 0.033538  | 2.422412  | 0.000000  | 6                  | 1.776979  | -1.469633 | 0.006705  |
| 1                  | -0.010456 | 0.738629  | 2.148009  | 6                  | 1.776979  | 1.469633  | -0.006705 |

|                                                                         |           |           |           |                                                                         |           |           |           |
|-------------------------------------------------------------------------|-----------|-----------|-----------|-------------------------------------------------------------------------|-----------|-----------|-----------|
| 1                                                                       | -0.015794 | -1.739027 | 2.152079  | 1                                                                       | -0.743462 | 2.475316  | 0.014454  |
| 1                                                                       | -0.013623 | -2.991378 | 0.000000  | 1                                                                       | -2.898720 | 1.248081  | 0.003461  |
| 1                                                                       | -0.015794 | -1.739027 | -2.152079 | 1                                                                       | -2.898719 | -1.248082 | -0.003460 |
| 1                                                                       | -0.010456 | 0.738629  | -2.148009 | 1                                                                       | -0.743460 | -2.475316 | -0.014456 |
| 1                                                                       | -0.464878 | 2.825976  | 0.885397  | 1                                                                       | 2.440302  | -1.142815 | -0.800654 |
| 1                                                                       | 1.064585  | 2.791913  | 0.000000  | 1                                                                       | 2.315045  | -1.320071 | 0.949397  |
| 1                                                                       | -0.464878 | 2.825976  | -0.885397 | 1                                                                       | 1.598290  | -2.540997 | -0.113025 |
|                                                                         |           |           |           | 1                                                                       | 1.598288  | 2.541003  | 0.112974  |
|                                                                         |           |           |           | 1                                                                       | 2.440280  | 1.142849  | 0.800686  |
|                                                                         |           |           |           | 1                                                                       | 2.315069  | 1.320029  | -0.949376 |
| <i>m</i> -C <sub>6</sub> H <sub>4</sub> (CH <sub>3</sub> ) <sub>2</sub> |           |           |           | <i>p</i> -C <sub>6</sub> H <sub>4</sub> (CH <sub>3</sub> ) <sub>2</sub> |           |           |           |
| 6                                                                       | 1.225896  | -0.272032 | -0.003615 | 6                                                                       | 1.421771  | 0.000000  | 0.014535  |
| 6                                                                       | 1.211382  | 1.129599  | -0.008194 | 6                                                                       | 0.698903  | -1.201100 | 0.008875  |
| 6                                                                       | 0.000000  | -0.951377 | -0.025505 | 6                                                                       | -0.698903 | -1.201100 | -0.008875 |
| 6                                                                       | 0.000001  | 1.826817  | 0.013264  | 6                                                                       | -1.421771 | 0.000000  | -0.014535 |
| 6                                                                       | -1.225897 | -0.272031 | -0.003608 | 6                                                                       | -0.698903 | 1.201100  | -0.008875 |
| 6                                                                       | -1.211382 | 1.129599  | -0.008193 | 6                                                                       | 0.698903  | 1.201100  | 0.008875  |
| 6                                                                       | 2.527908  | -1.032322 | 0.011815  | 6                                                                       | 2.928927  | 0.000000  | -0.006406 |
| 6                                                                       | -2.527908 | -1.032322 | 0.011813  | 1                                                                       | 1.235315  | -2.147821 | 0.014373  |
| 1                                                                       | 2.861362  | -1.217940 | 1.038601  | 1                                                                       | -1.235315 | -2.147821 | -0.014373 |
| 1                                                                       | 3.315993  | -0.471330 | -0.497729 | 6                                                                       | -2.928927 | 0.000000  | 0.006406  |
| 1                                                                       | 2.423267  | -2.000904 | -0.484487 | 1                                                                       | -1.235315 | 2.147821  | -0.014373 |
| 1                                                                       | -2.861351 | -1.217974 | 1.038596  | 1                                                                       | 1.235315  | 2.147821  | 0.014373  |
| 1                                                                       | -3.315999 | -0.471313 | -0.497704 | 1                                                                       | 3.328103  | -0.885444 | 0.495669  |
| 1                                                                       | -2.423273 | -2.000887 | -0.484522 | 1                                                                       | 3.307975  | 0.000000  | -1.034059 |
| 1                                                                       | 2.151837  | 1.676026  | -0.002485 | 1                                                                       | 3.328103  | 0.885445  | 0.495669  |
| 1                                                                       | -0.000001 | -2.040788 | -0.037383 | 1                                                                       | -3.328103 | 0.885444  | -0.495669 |
| 1                                                                       | 0.000001  | 2.913496  | 0.002938  | 1                                                                       | -3.328103 | -0.885445 | -0.495669 |
| 1                                                                       | -2.151836 | 1.676027  | -0.002480 | 1                                                                       | -3.307975 | 0.000001  | 1.034059  |
| C <sub>6</sub> H <sub>3</sub> (CH <sub>3</sub> ) <sub>3</sub>           |           |           |           | C <sub>6</sub> H <sub>2</sub> (CH <sub>3</sub> ) <sub>4</sub>           |           |           |           |
| 6                                                                       | 1.222447  | -0.705726 | -0.011238 | 6                                                                       | 1.228470  | 0.703935  | -0.015281 |
| 6                                                                       | 0.000042  | -1.390101 | -0.028897 | 6                                                                       | 1.228470  | -0.703935 | 0.015281  |
| 6                                                                       | -1.222404 | -0.705800 | -0.011237 | 6                                                                       | 0.000000  | -1.376387 | -0.005611 |
| 6                                                                       | -1.203971 | 0.694954  | 0.008038  | 6                                                                       | -1.228470 | -0.703935 | 0.015281  |
| 6                                                                       | -0.000042 | 1.411363  | 0.015965  | 6                                                                       | -1.228470 | 0.703935  | -0.015281 |
| 6                                                                       | 1.203929  | 0.695026  | 0.008034  | 6                                                                       | 0.000000  | 1.376387  | 0.005610  |
| 6                                                                       | 2.528478  | -1.459402 | 0.011335  | 6                                                                       | 2.523185  | 1.474366  | 0.003179  |
| 1                                                                       | 0.000075  | -2.479126 | -0.052428 | 6                                                                       | 2.523185  | -1.474366 | -0.003179 |
| 6                                                                       | -2.528390 | -1.459554 | 0.011334  | 1                                                                       | 0.000000  | -2.465616 | 0.017348  |
| 1                                                                       | -2.147349 | 1.239526  | 0.014257  | 6                                                                       | -2.523185 | -1.474366 | -0.003179 |
| 6                                                                       | -0.000088 | 2.919169  | -0.009709 | 6                                                                       | -2.523185 | 1.474366  | 0.003179  |
| 1                                                                       | 2.147275  | 1.239656  | 0.014254  | 1                                                                       | 0.000000  | 2.465616  | -0.017348 |
| 1                                                                       | 2.434933  | -2.421777 | -0.499364 | 1                                                                       | 2.338454  | 2.547059  | -0.095335 |
| 1                                                                       | 3.320239  | -0.887900 | -0.480802 | 1                                                                       | 3.071124  | 1.310250  | 0.937896  |

|                  |           |           |           |                  |           |           |           |
|------------------|-----------|-----------|-----------|------------------|-----------|-----------|-----------|
| 1                | 2.850433  | -1.657635 | 1.039474  | 1                | 3.181239  | 1.165794  | -0.816106 |
| 1                | -3.320183 | -0.888102 | -0.480812 | 1                | 2.338454  | -2.547059 | 0.095335  |
| 1                | -2.434785 | -2.421926 | -0.499359 | 1                | 3.071124  | -1.310250 | -0.937896 |
| 1                | -2.850340 | -1.657800 | 1.039472  | 1                | 3.181239  | -1.165793 | 0.816106  |
| 1                | 0.885461  | 3.320157  | 0.491071  | 1                | -2.338454 | -2.547059 | 0.095335  |
| 1                | -0.000094 | 3.295249  | -1.038569 | 1                | -3.181239 | -1.165794 | 0.816106  |
| 1                | -0.885665 | 3.320103  | 0.491062  | 1                | -3.071124 | -1.310250 | -0.937896 |
|                  |           |           |           | 1                | -2.338454 | 2.547059  | -0.095335 |
|                  |           |           |           | 1                | -3.071124 | 1.310250  | 0.937896  |
|                  |           |           |           | 1                | -3.181239 | 1.165793  | -0.816106 |
| $C_6H_5OH$       |           |           |           | $o-C_6H_4(OH)_2$ |           |           |           |
| 6                | -0.941326 | -0.021951 | 0.000001  | 6                | 0.530715  | 0.675536  | -0.018489 |
| 6                | -0.224841 | -1.222766 | -0.000003 | 6                | 0.506590  | -0.727381 | 0.009887  |
| 6                | 1.170438  | -1.194027 | 0.000004  | 6                | -0.717801 | -1.393234 | -0.014159 |
| 6                | 1.858601  | 0.024823  | -0.000003 | 6                | -1.910998 | -0.663929 | 0.010819  |
| 6                | 1.135307  | 1.220078  | 0.000004  | 6                | -1.883534 | 0.733272  | -0.003979 |
| 6                | -0.263198 | 1.201235  | -0.000004 | 6                | -0.655410 | 1.405356  | 0.008057  |
| 8                | -2.307932 | -0.110557 | 0.000000  | 8                | 1.790771  | 1.233862  | -0.039621 |
| 1                | -0.771925 | -2.160172 | 0.000000  | 8                | 1.667053  | -1.440280 | 0.005952  |
| 1                | 1.721579  | -2.130033 | 0.000002  | 1                | -0.716680 | -2.478689 | -0.001223 |
| 1                | 2.943715  | 0.041915  | 0.000000  | 1                | -2.860276 | -1.190208 | 0.000001  |
| 1                | 1.654707  | 2.174043  | 0.000002  | 1                | -2.807241 | 1.302578  | 0.015217  |
| 1                | -0.823496 | 2.133988  | -0.000005 | 1                | -0.618214 | 2.492269  | -0.015461 |
| 1                | -2.671006 | 0.780363  | 0.000016  | 1                | 1.733031  | 2.150644  | 0.244817  |
|                  |           |           |           | 1                | 2.389415  | -0.802973 | 0.073182  |
| $m-C_6H_4(OH)_2$ |           |           |           | $p-C_6H_4(OH)_2$ |           |           |           |
| 6                | 1.197743  | -0.318591 | -0.000020 | 6                | 1.401204  | 0.023362  | 0.000004  |
| 6                | -0.020023 | -1.004182 | 0.000059  | 6                | 0.681646  | 1.219859  | -0.000025 |
| 6                | -1.215221 | -0.283980 | -0.000018 | 6                | -0.714953 | 1.195633  | 0.000001  |
| 6                | -1.205621 | 1.115039  | 0.000034  | 6                | -1.401202 | -0.023360 | -0.000011 |
| 6                | 0.017761  | 1.782360  | -0.000038 | 6                | -0.681646 | -1.219851 | 0.000000  |
| 6                | 1.226640  | 1.077753  | 0.000040  | 6                | 0.714950  | -1.195637 | -0.000025 |
| 8                | 2.331409  | -1.087486 | -0.000021 | 8                | 2.770468  | 0.110646  | 0.000021  |
| 1                | -0.012211 | -2.091131 | 0.000051  | 1                | 1.221219  | 2.161507  | -0.000028 |
| 8                | -2.437820 | -0.899375 | -0.000023 | 1                | -1.267757 | 2.132718  | -0.000014 |
| 1                | -2.147663 | 1.652125  | -0.000001 | 8                | -2.770466 | -0.110651 | 0.000015  |
| 1                | 0.034598  | 2.868260  | -0.000017 | 1                | -1.221224 | -2.161496 | -0.000014 |
| 1                | 2.175619  | 1.607821  | 0.000000  | 1                | 1.267752  | -2.132722 | -0.000024 |
| 1                | 3.093967  | -0.500877 | -0.000032 | 1                | 3.131651  | -0.780684 | 0.000063  |
| 1                | -2.300688 | -1.851701 | 0.000003  | 1                | -3.131653 | 0.780677  | 0.000066  |
| $C_6H_3(OH)_3$   |           |           |           | $C_6H_2(OH)_4$   |           |           |           |
| 6                | -0.452311 | 1.311605  | -0.000013 | 6                | -1.213400 | -0.672704 | -0.000023 |
| 6                | 0.922679  | 1.058215  | 0.000041  | 6                | -1.198924 | 0.727196  | -0.009914 |

|                    |           |           |           |                    |           |           |           |
|--------------------|-----------|-----------|-----------|--------------------|-----------|-----------|-----------|
| 6                  | 1.362074  | -0.264096 | -0.000009 | 6                  | 0.023454  | 1.398345  | 0.026619  |
| 6                  | 0.455101  | -1.328160 | 0.000012  | 6                  | 1.213400  | 0.672704  | 0.000023  |
| 6                  | -0.909756 | -1.047511 | -0.000005 | 6                  | 1.198924  | -0.727197 | 0.009914  |
| 6                  | -1.377810 | 0.269960  | 0.000021  | 6                  | -0.023454 | -1.398345 | -0.026619 |
| 8                  | -0.829358 | 2.627116  | -0.000025 | 8                  | -2.468425 | -1.248899 | -0.044116 |
| 1                  | 1.617643  | 1.892702  | 0.000028  | 8                  | -2.359920 | 1.444491  | -0.002885 |
| 8                  | 2.689863  | -0.595320 | -0.000010 | 1                  | 0.029250  | 2.484613  | 0.048578  |
| 1                  | 0.830287  | -2.347268 | -0.000021 | 8                  | 2.468425  | 1.248899  | 0.044116  |
| 8                  | -1.860487 | -2.031810 | -0.000022 | 8                  | 2.359920  | -1.444491 | 0.002885  |
| 1                  | -2.447971 | 0.454608  | 0.000000  | 1                  | -0.029250 | -2.484613 | -0.048578 |
| 1                  | -1.790712 | 2.666850  | 0.000077  | 1                  | -2.422961 | -2.123920 | 0.351867  |
| 1                  | 3.204950  | 0.217370  | -0.000025 | 1                  | -3.080073 | 0.803068  | 0.048612  |
| 1                  | -1.414212 | -2.884229 | 0.000114  | 1                  | 2.422961  | 2.123921  | -0.351865 |
|                    |           |           |           | 1                  | 3.080073  | -0.803068 | -0.048611 |
| $C_6H_5NH_2$       |           |           |           | $o-C_6H_4(NH_2)_2$ |           |           |           |
| 6                  | 0.937690  | 0.000000  | 0.003142  | 6                  | -0.505117 | 0.705150  | -0.013622 |
| 6                  | 0.222805  | 1.207404  | -0.020988 | 6                  | -0.505118 | -0.705150 | 0.013623  |
| 6                  | -1.173224 | 1.205674  | 0.013960  | 6                  | 0.711605  | -1.392169 | -0.042799 |
| 6                  | -1.881689 | 0.000000  | 0.002176  | 6                  | 1.925786  | -0.698575 | -0.014222 |
| 6                  | -1.173224 | -1.205674 | 0.013960  | 6                  | 1.925786  | 0.698575  | 0.014222  |
| 6                  | 0.222805  | -1.207404 | -0.020988 | 6                  | 0.711606  | 1.392169  | 0.042799  |
| 7                  | 2.340093  | 0.000000  | -0.079664 | 7                  | -1.752568 | 1.360293  | 0.037627  |
| 1                  | 0.765519  | 2.150080  | -0.021836 | 7                  | -1.752569 | -1.360292 | -0.037627 |
| 1                  | -1.707091 | 2.151900  | 0.006942  | 1                  | 0.704547  | -2.480260 | -0.045586 |
| 1                  | -2.966820 | 0.000000  | 0.026200  | 1                  | 2.861773  | -1.248002 | -0.044370 |
| 1                  | -1.707091 | -2.151900 | 0.006942  | 1                  | 2.861773  | 1.248001  | 0.044370  |
| 1                  | 0.765519  | -2.150080 | -0.021836 | 1                  | 0.704548  | 2.480260  | 0.045586  |
| 1                  | 2.769173  | 0.830196  | 0.306833  | 1                  | -1.676006 | 2.356697  | -0.125672 |
| 1                  | 2.769173  | -0.830196 | 0.306833  | 1                  | -2.415980 | 0.956532  | -0.616845 |
|                    |           |           |           | 1                  | -1.676007 | -2.356696 | 0.125670  |
|                    |           |           |           | 1                  | -2.415980 | -0.956532 | 0.616846  |
| $m-C_6H_4(NH_2)_2$ |           |           |           | $p-C_6H_4(NH_2)_2$ |           |           |           |
| 6                  | 1.218870  | -0.291293 | 0.002683  | 6                  | 1.418823  | 0.000000  | 0.002967  |
| 6                  | 0.000000  | -0.979533 | -0.033815 | 6                  | 0.698121  | 1.202253  | -0.009177 |
| 6                  | -1.218870 | -0.291293 | 0.002683  | 6                  | -0.698121 | 1.202253  | -0.009180 |
| 6                  | -1.214923 | 1.110990  | -0.008172 | 6                  | -1.418823 | 0.000000  | 0.002969  |
| 6                  | 0.000000  | 1.797505  | 0.018248  | 6                  | -0.698121 | -1.202253 | -0.009180 |
| 6                  | 1.214923  | 1.110991  | -0.008172 | 6                  | 0.698121  | -1.202253 | -0.009177 |
| 7                  | 2.430634  | -1.001142 | -0.077005 | 7                  | 2.827284  | 0.000000  | -0.075779 |
| 1                  | 0.000000  | -2.068334 | -0.053334 | 1                  | 1.232804  | 2.149573  | -0.019329 |
| 7                  | -2.430634 | -1.001141 | -0.077005 | 1                  | -1.232804 | 2.149573  | -0.019329 |
| 1                  | -2.155316 | 1.655561  | 0.005201  | 7                  | -2.827284 | 0.000000  | -0.075779 |
| 1                  | 0.000000  | 2.884103  | 0.019382  | 1                  | -1.232804 | -2.149573 | -0.019329 |
| 1                  | 2.155316  | 1.655561  | 0.005201  | 1                  | 1.232804  | -2.149573 | -0.019329 |

|                  |           |           |           |                              |           |           |           |
|------------------|-----------|-----------|-----------|------------------------------|-----------|-----------|-----------|
| 1                | 3.216349  | -0.496818 | 0.311914  | 1                            | 3.246467  | 0.826401  | 0.330721  |
| 1                | 2.382250  | -1.930736 | 0.318537  | 1                            | 3.246467  | -0.826401 | 0.330721  |
| 1                | -2.382250 | -1.930737 | 0.318535  | 1                            | -3.246468 | -0.826401 | 0.330721  |
| 1                | -3.216349 | -0.496818 | 0.311915  | 1                            | -3.246468 | 0.826401  | 0.330721  |
| $C_6H_3(NH_2)_3$ |           |           |           | $C_6H_2(NH_2)_4$             |           |           |           |
| 6                | 0.653863  | 1.237508  | 0.001579  | 6                            | -1.218883 | -0.702455 | -0.027513 |
| 6                | -0.744179 | 1.184057  | -0.018109 | 6                            | -1.218911 | 0.702445  | 0.027502  |
| 6                | -1.398644 | -0.052492 | 0.001579  | 6                            | -0.000021 | 1.387399  | 0.000062  |
| 6                | -0.653334 | -1.236507 | -0.018107 | 6                            | 1.218898  | 0.702463  | -0.027519 |
| 6                | 0.744782  | -1.185015 | 0.001580  | 6                            | 1.218905  | -0.702437 | 0.027519  |
| 6                | 1.397513  | 0.052450  | -0.018107 | 6                            | 0.000009  | -1.387382 | 0.000015  |
| 7                | 1.310420  | 2.480116  | -0.073884 | 7                            | -2.468416 | -1.366076 | 0.008681  |
| 1                | -1.323052 | 2.105096  | -0.027145 | 7                            | -2.468470 | 1.366030  | -0.008707 |
| 7                | -2.803054 | -0.105201 | -0.073884 | 1                            | -0.000043 | 2.476940  | 0.000073  |
| 1                | -1.161540 | -2.198345 | -0.027142 | 7                            | 2.468432  | 1.366078  | 0.008668  |
| 7                | 1.492633  | -2.374915 | -0.073881 | 7                            | 2.468462  | -1.366040 | -0.008693 |
| 1                | 2.484593  | 0.093249  | -0.027142 | 1                            | 0.000017  | -2.476920 | 0.000052  |
| 1                | 0.775185  | 3.241651  | 0.321744  | 1                            | -2.382005 | -2.358243 | -0.176327 |
| 1                | 2.241141  | 2.467084  | 0.321745  | 1                            | -3.119732 | -0.958915 | -0.656616 |
| 1                | -3.194945 | -0.949495 | 0.321746  | 1                            | -3.119759 | 0.958891  | 0.656632  |
| 1                | -3.257128 | 0.707344  | 0.321745  | 1                            | -2.382078 | 2.358207  | 0.176254  |
| 1                | 2.419759  | -2.292156 | 0.321749  | 1                            | 3.119757  | 0.958872  | -0.656589 |
| 1                | 1.015986  | -3.174427 | 0.321749  | 1                            | 2.382025  | 2.358233  | -0.176408 |
|                  |           |           |           | 1                            | 3.119728  | -0.958970 | 0.656710  |
|                  |           |           |           | 1                            | 2.382052  | -2.358232 | 0.176180  |
| $C_6H_5OCH_3$    |           |           |           | <i>o</i> - $C_6H_4(OCH_3)_2$ |           |           |           |
| 6                | 0.460195  | -0.278141 | -0.000019 | 6                            | 0.709079  | -0.143239 | 0.000007  |
| 6                | 0.045122  | 1.059842  | -0.000002 | 6                            | -0.709135 | -0.143112 | -0.000008 |
| 6                | -1.325479 | 1.355550  | -0.000014 | 6                            | -1.397446 | 1.071447  | 0.000008  |
| 6                | -2.278364 | 0.337376  | 0.000020  | 6                            | -0.694678 | 2.287330  | -0.000008 |
| 6                | -1.853181 | -0.998176 | -0.000005 | 6                            | 0.695044  | 2.287192  | 0.000011  |
| 6                | -0.495127 | -1.305990 | 0.000014  | 6                            | 1.397584  | 1.071189  | -0.000014 |
| 8                | 1.762371  | -0.685307 | -0.000026 | 8                            | 1.290726  | -1.371186 | 0.000006  |
| 1                | 0.762226  | 1.872045  | -0.000026 | 8                            | -1.290924 | -1.371000 | -0.000006 |
| 1                | -1.639287 | 2.395627  | 0.000000  | 1                            | -2.480807 | 1.085676  | 0.000000  |
| 1                | -3.337011 | 0.577085  | 0.000007  | 1                            | -1.246668 | 3.222125  | 0.000004  |
| 1                | -2.582373 | -1.803306 | 0.000020  | 1                            | 1.247208  | 3.221883  | -0.000002 |
| 1                | -0.146315 | -2.334134 | 0.000000  | 1                            | 2.480949  | 1.085226  | 0.000006  |
| 6                | 2.746675  | 0.334578  | 0.000023  | 6                            | 2.707947  | -1.394339 | 0.000000  |
| 1                | 3.706778  | -0.179469 | 0.000029  | 6                            | -2.708146 | -1.394108 | 0.000002  |
| 1                | 2.669002  | 0.962210  | -0.894544 | 1                            | 2.984570  | -2.447696 | 0.000000  |
| 1                | 2.668962  | 0.962161  | 0.894622  | 1                            | 3.113859  | -0.909221 | 0.894704  |
|                  |           |           |           | 1                            | 3.113850  | -0.909223 | -0.894709 |
|                  |           |           |           | 1                            | -2.984790 | -2.447459 | 0.000000  |

|                                                                          |           |           |           |                                                                          |           |           |           |
|--------------------------------------------------------------------------|-----------|-----------|-----------|--------------------------------------------------------------------------|-----------|-----------|-----------|
|                                                                          | 1         | -3.114045 | -0.908982 | -0.894701                                                                |           |           |           |
|                                                                          | 1         | -3.114034 | -0.908990 | 0.894716                                                                 |           |           |           |
| <i>m</i> -C <sub>6</sub> H <sub>4</sub> (OCH <sub>3</sub> ) <sub>2</sub> |           |           |           | <i>p</i> -C <sub>6</sub> H <sub>4</sub> (OCH <sub>3</sub> ) <sub>2</sub> |           |           |           |
| 6                                                                        | -1.052978 | -0.212204 | -0.000011 | 6                                                                        | 1.375615  | -0.297309 | -0.000063 |
| 6                                                                        | 0.281589  | -0.652603 | -0.000006 | 6                                                                        | 0.942016  | 1.036932  | -0.000071 |
| 6                                                                        | 1.317226  | 0.280983  | -0.000011 | 6                                                                        | -0.425305 | 1.323142  | -0.000050 |
| 6                                                                        | 1.029110  | 1.656498  | 0.000006  | 6                                                                        | -1.375616 | 0.297313  | -0.000029 |
| 6                                                                        | -0.295250 | 2.073412  | -0.000002 | 6                                                                        | -0.942016 | -1.036928 | -0.000033 |
| 6                                                                        | -1.354706 | 1.151247  | 0.000007  | 6                                                                        | 0.425303  | -1.323137 | -0.000028 |
| 8                                                                        | -1.981281 | -1.214545 | -0.000018 | 8                                                                        | 2.684600  | -0.692876 | -0.000087 |
| 1                                                                        | 0.454925  | -1.721552 | -0.000019 | 1                                                                        | 1.646445  | 1.860334  | -0.000094 |
| 8                                                                        | 2.641891  | -0.044837 | -0.000008 | 1                                                                        | -0.773411 | 2.351648  | -0.000053 |
| 1                                                                        | 1.851414  | 2.363993  | 0.000000  | 8                                                                        | -2.684603 | 0.692874  | -0.000015 |
| 1                                                                        | -0.520417 | 3.136107  | 0.000012  | 1                                                                        | -1.646444 | -1.860330 | -0.000010 |
| 1                                                                        | -2.376418 | 1.509158  | 0.000002  | 1                                                                        | 0.773408  | -2.351642 | -0.000027 |
| 6                                                                        | -3.341801 | -0.815937 | 0.000015  | 6                                                                        | 3.654111  | 0.339613  | 0.000158  |
| 6                                                                        | 2.954883  | -1.427712 | 0.000015  | 1                                                                        | 4.621765  | -0.160466 | 0.000206  |
| 1                                                                        | -3.921287 | -1.738139 | 0.000005  | 1                                                                        | 3.568884  | 0.967072  | -0.894254 |
| 1                                                                        | -3.584125 | -0.232064 | -0.894578 | 1                                                                        | 3.568663  | 0.966840  | 0.894711  |
| 1                                                                        | -3.584091 | -0.232102 | 0.894642  | 6                                                                        | -3.654108 | -0.339621 | 0.000104  |
| 1                                                                        | 4.042417  | -1.485869 | 0.000018  | 1                                                                        | -4.621765 | 0.160451  | 0.000134  |
| 1                                                                        | 2.562136  | -1.923304 | -0.894457 | 1                                                                        | -3.568822 | -0.967017 | -0.894346 |
| 1                                                                        | 2.562133  | -1.923271 | 0.894505  | 1                                                                        | -3.568708 | -0.966912 | 0.894618  |
| C <sub>6</sub> H <sub>3</sub> (OCH <sub>3</sub> ) <sub>3</sub>           |           |           |           | C <sub>6</sub> H <sub>2</sub> (OCH <sub>3</sub> ) <sub>4</sub>           |           |           |           |
| 6                                                                        | 0.069047  | 1.388351  | -0.000007 | 6                                                                        | -1.220152 | -0.702616 | 0.002975  |
| 6                                                                        | 1.256909  | 0.633134  | 0.000052  | 6                                                                        | -1.220147 | 0.702623  | -0.002980 |
| 6                                                                        | 1.167901  | -0.753863 | 0.000005  | 6                                                                        | 0.000005  | 1.390932  | 0.000100  |
| 6                                                                        | -0.080173 | -1.404835 | -0.000014 | 6                                                                        | 1.220155  | 0.702616  | 0.002829  |
| 6                                                                        | -1.236895 | -0.634461 | -0.000046 | 6                                                                        | 1.220150  | -0.702624 | -0.002846 |
| 6                                                                        | -1.176584 | 0.771860  | 0.000006  | 6                                                                        | -0.000004 | -1.390932 | -0.000106 |
| 8                                                                        | 0.255958  | 2.740946  | 0.000009  | 8                                                                        | -2.445012 | -1.303742 | 0.015101  |
| 1                                                                        | 2.197580  | 1.167828  | 0.000068  | 8                                                                        | -2.445002 | 1.303759  | -0.015104 |
| 8                                                                        | 2.245720  | -1.592156 | 0.000023  | 1                                                                        | 0.000003  | 2.471552  | -0.000055 |
| 1                                                                        | -0.087410 | -2.486828 | -0.000058 | 8                                                                        | 2.445013  | 1.303744  | 0.014998  |
| 8                                                                        | -2.501746 | -1.148791 | -0.000058 | 8                                                                        | 2.445003  | -1.303762 | -0.015018 |
| 1                                                                        | -2.109961 | 1.319186  | -0.000051 | 1                                                                        | -0.000014 | -2.471553 | 0.000039  |
| 6                                                                        | -0.915447 | 3.540021  | 0.000002  | 6                                                                        | -2.455760 | -2.710955 | -0.138575 |
| 6                                                                        | 3.523506  | -0.977368 | -0.000031 | 6                                                                        | -2.455738 | 2.710971  | 0.138585  |
| 6                                                                        | -2.608155 | -2.562788 | 0.000054  | 6                                                                        | 2.455756  | 2.710973  | -0.138540 |
| 1                                                                        | -0.570256 | 4.573061  | 0.000056  | 6                                                                        | 2.455736  | -2.710987 | 0.138565  |
| 1                                                                        | -1.520222 | 3.355729  | 0.894434  | 1                                                                        | -3.506680 | -2.996930 | -0.163761 |
| 1                                                                        | -1.520166 | 3.355801  | -0.894482 | 1                                                                        | -1.966641 | -3.212885 | 0.704580  |
| 1                                                                        | 4.245459  | -1.792915 | -0.000036 | 1                                                                        | -1.970732 | -3.012151 | -1.074375 |
| 1                                                                        | 3.666410  | -0.361514 | 0.894413  | 1                                                                        | -3.506655 | 2.996955  | 0.163776  |



|                     |           |           |           |                     |           |           |           |
|---------------------|-----------|-----------|-----------|---------------------|-----------|-----------|-----------|
| 1                   | 3.666347  | -0.361549 | -0.894507 | 1                   | -1.966618 | 3.212904  | -0.704568 |
| 1                   | -3.675406 | -2.780280 | 0.000047  | 1                   | -1.970704 | 3.012155  | 1.074385  |
| 1                   | -2.146262 | -2.994333 | 0.894562  | 1                   | 3.506675  | 2.996953  | -0.163698 |
| 1                   | -2.146223 | -2.994488 | -0.894360 | 1                   | 1.966635  | 3.212811  | 0.704669  |
|                     |           |           |           | 1                   | 1.970730  | 3.012269  | -1.074308 |
|                     |           |           |           | 1                   | 3.506653  | -2.996973 | 0.163733  |
|                     |           |           |           | 1                   | 1.966612  | -3.212849 | -0.704627 |
|                     |           |           |           | 1                   | 1.970708  | -3.012249 | 1.074343  |
| $C_6H_5NMe_2$       |           |           |           | $o-C_6H_4(NMe_2)_2$ |           |           |           |
| 6                   | -0.188218 | -0.000001 | -0.123724 | 6                   | 0.713196  | 0.240588  | 0.031804  |
| 6                   | 0.542467  | -1.207239 | -0.064696 | 6                   | 1.383984  | 1.472630  | 0.100740  |
| 6                   | 1.935924  | -1.201079 | 0.028945  | 6                   | 0.695406  | 2.689951  | 0.059737  |
| 6                   | 2.647706  | 0.000001  | 0.077156  | 6                   | -0.692413 | 2.690729  | -0.059790 |
| 6                   | 1.935922  | 1.201081  | 0.028951  | 6                   | -1.382418 | 1.474203  | -0.100748 |
| 6                   | 0.542465  | 1.207238  | -0.064690 | 6                   | -0.713076 | 0.241350  | -0.031757 |
| 7                   | -1.580664 | -0.000002 | -0.275049 | 7                   | 1.413952  | -0.990656 | 0.045787  |
| 1                   | 0.032124  | -2.161977 | -0.096497 | 1                   | 2.467014  | 1.486587  | 0.152457  |
| 1                   | 2.463267  | -2.150307 | 0.072460  | 1                   | 1.248742  | 3.623590  | 0.104610  |
| 1                   | 3.730481  | 0.000002  | 0.153163  | 1                   | -1.244708 | 3.624985  | -0.104702 |
| 1                   | 2.463264  | 2.150309  | 0.072471  | 1                   | -2.465413 | 1.489515  | -0.152430 |
| 1                   | 0.032121  | 2.161976  | -0.096484 | 6                   | 1.280547  | -1.744030 | -1.202593 |
| 6                   | -2.276494 | -1.217648 | 0.110457  | 6                   | 2.802775  | -0.926152 | 0.465944  |
| 6                   | -2.276494 | 1.217648  | 0.110444  | 1                   | 1.819458  | -1.247257 | -2.026979 |
| 1                   | -2.103581 | -1.489621 | 1.164493  | 1                   | 0.226325  | -1.840037 | -1.461751 |
| 1                   | -3.346577 | -1.069003 | -0.043009 | 1                   | 1.705198  | -2.742674 | -1.061103 |
| 1                   | -1.967988 | -2.053668 | -0.519874 | 1                   | 3.457576  | -0.422481 | -0.266510 |
| 1                   | -2.103579 | 1.489634  | 1.164477  | 1                   | 2.879182  | -0.406196 | 1.423751  |
| 1                   | -1.967991 | 2.053661  | -0.519897 | 1                   | 3.167810  | -1.949021 | 0.594042  |
| 1                   | -3.346577 | 1.069000  | -0.043017 | 7                   | -1.415058 | -0.989209 | -0.045741 |
|                     |           |           |           | 6                   | -1.282319 | -1.742718 | 1.202642  |
|                     |           |           |           | 1                   | -1.820789 | -1.245446 | 2.027013  |
|                     |           |           |           | 1                   | -0.228170 | -1.839604 | 1.461802  |
|                     |           |           |           | 1                   | -1.707878 | -2.740971 | 1.061127  |
|                     |           |           |           | 6                   | -2.803833 | -0.923649 | -0.465997 |
|                     |           |           |           | 1                   | -3.458312 | -0.419604 | 0.266476  |
|                     |           |           |           | 1                   | -3.169591 | -1.946234 | -0.594271 |
|                     |           |           |           | 1                   | -2.879790 | -0.403511 | -1.423739 |
| $m-C_6H_4(NMe_2)_2$ |           |           |           | $p-C_6H_4(NMe_2)_2$ |           |           |           |
| 6                   | 1.233251  | 0.216136  | -0.148155 | 6                   | -1.440894 | -0.000001 | -0.167609 |
| 6                   | 0.000000  | -0.463758 | -0.188958 | 6                   | -0.698136 | -1.197125 | -0.154655 |
| 6                   | -1.233251 | 0.216137  | -0.148156 | 6                   | 0.698137  | -1.197125 | -0.154655 |
| 6                   | -1.219622 | 1.621373  | -0.041030 | 6                   | 1.440894  | 0.000000  | -0.167609 |
| 6                   | 0.000000  | 2.295161  | 0.012198  | 6                   | 0.698137  | 1.197123  | -0.154638 |
| 6                   | 1.219622  | 1.621372  | -0.041028 | 6                   | -0.698137 | 1.197123  | -0.154638 |

|                   |           |           |           |   |           |           |           |
|-------------------|-----------|-----------|-----------|---|-----------|-----------|-----------|
| 7                 | 2.441176  | -0.492218 | -0.251751 | 7 | -2.845955 | -0.000002 | -0.233058 |
| 1                 | -0.000001 | -1.540009 | -0.261282 | 1 | -1.198283 | -2.158307 | -0.144781 |
| 7                 | -2.441177 | -0.492217 | -0.251753 | 1 | 1.198283  | -2.158306 | -0.144781 |
| 1                 | -2.137833 | 2.192105  | 0.007229  | 7 | 2.845955  | -0.000001 | -0.233058 |
| 1                 | 0.000001  | 3.378511  | 0.102613  | 1 | 1.198282  | 2.158305  | -0.144749 |
| 1                 | 2.137834  | 2.192104  | 0.007232  | 1 | -1.198283 | 2.158305  | -0.144749 |
| 6                 | 3.627633  | 0.180533  | 0.254222  | 6 | -3.502668 | -1.212683 | 0.228675  |
| 6                 | 2.397498  | -1.909194 | 0.069440  | 6 | -3.502670 | 1.212686  | 0.228653  |
| 6                 | -2.397499 | -1.909194 | 0.069436  | 1 | -3.255880 | -1.457768 | 1.275483  |
| 6                 | -3.627632 | 0.180532  | 0.254227  | 1 | -4.582424 | -1.076295 | 0.144599  |
| 1                 | 4.484905  | -0.482319 | 0.123959  | 1 | -3.229365 | -2.061396 | -0.400850 |
| 1                 | 3.542617  | 0.446373  | 1.320544  | 1 | -3.255887 | 1.457788  | 1.275459  |
| 1                 | 3.826946  | 1.089503  | -0.315922 | 1 | -3.229362 | 2.061388  | -0.400883 |
| 1                 | 3.405003  | -2.317874 | -0.025751 | 1 | -4.582425 | 1.076297  | 0.144575  |
| 1                 | 2.031082  | -2.102931 | 1.091194  | 6 | 3.502669  | 1.212686  | 0.228658  |
| 1                 | 1.759676  | -2.445877 | -0.636242 | 6 | 3.502669  | -1.212683 | 0.228670  |
| 1                 | -3.405004 | -2.317874 | -0.025759 | 1 | 3.255885  | 1.457784  | 1.275464  |
| 1                 | -2.031086 | -2.102931 | 1.091191  | 1 | 4.582425  | 1.076298  | 0.144581  |
| 1                 | -1.759674 | -2.445875 | -0.636245 | 1 | 3.229362  | 2.061391  | -0.400875 |
| 1                 | -4.484905 | -0.482317 | 0.123960  | 1 | 3.255882  | -1.457773 | 1.275477  |
| 1                 | -3.542613 | 0.446365  | 1.320550  | 1 | 3.229365  | -2.061394 | -0.400858 |
| 1                 | -3.826945 | 1.089507  | -0.315911 | 1 | 4.582425  | -1.076295 | 0.144594  |
| $C_6H_3(NMe_2)_3$ |           |           |           |   |           |           |           |
| 6                 | -0.186869 | 1.398104  | -0.196687 |   |           |           |           |
| 6                 | 1.109877  | 0.855120  | -0.191658 |   |           |           |           |
| 6                 | 1.304229  | -0.537219 | -0.196688 |   |           |           |           |
| 6                 | 0.185618  | -1.388742 | -0.191659 |   |           |           |           |
| 6                 | -1.117359 | -0.860886 | -0.196687 |   |           |           |           |
| 6                 | -1.295494 | 0.533621  | -0.191658 |   |           |           |           |
| 7                 | -0.373126 | 2.791635  | -0.244064 |   |           |           |           |
| 1                 | 1.963652  | 1.512923  | -0.185660 |   |           |           |           |
| 7                 | 2.604190  | -1.072681 | -0.244066 |   |           |           |           |
| 1                 | 0.328404  | -2.457034 | -0.185664 |   |           |           |           |
| 7                 | -2.231063 | -1.718955 | -0.244065 |   |           |           |           |
| 1                 | -2.292056 | 0.944110  | -0.185660 |   |           |           |           |
| 6                 | -1.665346 | 3.289071  | 0.199308  |   |           |           |           |
| 6                 | 0.743092  | 3.610980  | 0.199313  |   |           |           |           |
| 6                 | 3.681093  | -0.202303 | 0.199304  |   |           |           |           |
| 6                 | 2.755655  | -2.449026 | 0.199314  |   |           |           |           |
| 6                 | -2.015747 | -3.086767 | 0.199313  |   |           |           |           |
| 6                 | -3.498748 | -1.161953 | 0.199306  |   |           |           |           |
| 1                 | -1.659022 | 4.378698  | 0.134643  |   |           |           |           |
| 1                 | -1.901391 | 2.995850  | 1.235632  |   |           |           |           |
| 1                 | -2.462654 | 2.928656  | -0.454044 |   |           |           |           |
| 1                 | 0.450826  | 4.660698  | 0.134648  |   |           |           |           |

|   |           |           |           |  |
|---|-----------|-----------|-----------|--|
| 1 | 1.047855  | 3.390041  | 1.235638  |  |
| 1 | 1.607069  | 3.472611  | -0.454036 |  |
| 1 | 4.621576  | -0.752594 | 0.134638  |  |
| 1 | 3.545180  | 0.148729  | 1.235627  |  |
| 1 | 3.767617  | 0.668392  | -0.454050 |  |
| 1 | 3.810870  | -2.720775 | 0.134648  |  |
| 1 | 2.411935  | -2.602488 | 1.235638  |  |
| 1 | 2.203835  | -3.128069 | -0.454035 |  |
| 1 | -2.962553 | -3.626104 | 0.134648  |  |
| 1 | -1.643789 | -3.144572 | 1.235637  |  |
| 1 | -1.304963 | -3.597051 | -0.454036 |  |
| 1 | -4.261697 | -1.939922 | 0.134640  |  |
| 1 | -3.459795 | -0.787548 | 1.235629  |  |
| 1 | -3.810903 | -0.344544 | -0.454047 |  |

**Table S7.** RHF/6-311++G\*\* Optimized Structures for Substituted Benzenes that Gave Negative Frequencies when Calculated at the MP2(full)/6-311++G\*\* level of theory.

| C <sub>6</sub> H <sub>6</sub>                           |           |           |           |                                                         |           |           |           |
|---------------------------------------------------------|-----------|-----------|-----------|---------------------------------------------------------|-----------|-----------|-----------|
| 6                                                       | 0.000000  | 1.385858  | -0.000004 |                                                         |           |           |           |
| 6                                                       | 0.000000  | -1.385858 | -0.000004 |                                                         |           |           |           |
| 6                                                       | -1.200188 | 0.692929  | -0.000004 |                                                         |           |           |           |
| 6                                                       | 1.200188  | 0.692929  | -0.000004 |                                                         |           |           |           |
| 6                                                       | -1.200188 | -0.692929 | -0.000004 |                                                         |           |           |           |
| 6                                                       | 1.200188  | -0.692929 | -0.000004 |                                                         |           |           |           |
| 1                                                       | 0.000000  | 2.461273  | 0.000024  |                                                         |           |           |           |
| 1                                                       | -2.131525 | 1.230636  | 0.000024  |                                                         |           |           |           |
| 1                                                       | -2.131525 | -1.230636 | 0.000024  |                                                         |           |           |           |
| 1                                                       | 0.000000  | -2.461273 | 0.000024  |                                                         |           |           |           |
| 1                                                       | 2.131525  | -1.230636 | 0.000024  |                                                         |           |           |           |
| 1                                                       | 2.131525  | 1.230636  | 0.000024  |                                                         |           |           |           |
| C <sub>6</sub> H <sub>5</sub> F                         |           |           |           | <i>o</i> -C <sub>6</sub> H <sub>4</sub> F <sub>2</sub>  |           |           |           |
| 6                                                       | 0.924979  | 0.000000  | 0.000000  | 6                                                       | 0.534555  | -0.689065 | 0.000001  |
| 6                                                       | 0.261902  | 1.206900  | 0.000000  | 6                                                       | 0.534555  | 0.689065  | -0.000001 |
| 6                                                       | -1.123697 | 1.198267  | 0.000000  | 6                                                       | -0.650061 | 1.388248  | 0.000001  |
| 6                                                       | -1.819930 | 0.000000  | 0.000000  | 6                                                       | -1.848483 | 0.692093  | -0.000001 |
| 6                                                       | -1.123697 | -1.198267 | 0.000000  | 6                                                       | -1.848483 | -0.692093 | 0.000001  |
| 6                                                       | 0.261902  | -1.206900 | 0.000000  | 6                                                       | -0.650061 | -1.388248 | -0.000001 |
| 9                                                       | 2.252929  | 0.000000  | 0.000000  | 9                                                       | 1.686706  | -1.333838 | 0.000000  |
| 1                                                       | 0.822498  | 2.123090  | 0.000000  | 9                                                       | 1.686706  | 1.333838  | 0.000000  |
| 1                                                       | -1.657729 | 2.131460  | 0.000000  | 1                                                       | -0.619958 | 2.461993  | 0.000000  |
| 1                                                       | -2.894647 | 0.000000  | 0.000000  | 1                                                       | -2.776462 | 1.233494  | 0.000001  |
| 1                                                       | -1.657729 | -2.131460 | 0.000000  | 1                                                       | -2.776462 | -1.233494 | -0.000001 |
| 1                                                       | 0.822498  | -2.123090 | 0.000000  | 1                                                       | -0.619958 | -2.461993 | 0.000000  |
| C <sub>6</sub> H <sub>2</sub> F <sub>4</sub>            |           |           |           | C <sub>6</sub> H <sub>5</sub> Cl                        |           |           |           |
| 6                                                       | 1.185418  | -0.688187 | 0.000003  | 6                                                       | 0.500398  | 0.000000  | -0.000005 |
| 6                                                       | 1.185418  | 0.688187  | -0.000002 | 6                                                       | -0.176608 | 1.204936  | 0.000002  |
| 6                                                       | 0.000000  | 1.387441  | -0.000005 | 6                                                       | -1.562015 | 1.198071  | 0.000019  |
| 6                                                       | -1.185418 | 0.688187  | -0.000003 | 6                                                       | -2.257306 | 0.000000  | 0.000025  |
| 6                                                       | -1.185418 | -0.688187 | 0.000003  | 6                                                       | -1.562015 | -1.198071 | 0.000018  |
| 6                                                       | 0.000000  | -1.387441 | 0.000005  | 6                                                       | -0.176608 | -1.204936 | 0.000000  |
| 9                                                       | 2.330124  | -1.338868 | 0.000005  | 17                                                      | 2.246348  | 0.000000  | -0.000026 |
| 9                                                       | 2.330124  | 1.338868  | -0.000005 | 1                                                       | 0.369404  | 2.129328  | -0.000003 |
| 1                                                       | 0.000000  | 2.460576  | -0.000008 | 1                                                       | -2.094764 | 2.132010  | 0.000025  |
| 9                                                       | -2.330124 | 1.338868  | -0.000006 | 1                                                       | -3.332271 | 0.000000  | 0.000038  |
| 9                                                       | -2.330124 | -1.338869 | 0.000006  | 1                                                       | -2.094764 | -2.132010 | 0.000023  |
| 1                                                       | 0.000000  | -2.460576 | 0.000009  | 1                                                       | 0.369404  | -2.129328 | -0.000006 |
| <i>o</i> -C <sub>6</sub> H <sub>4</sub> Cl <sub>2</sub> |           |           |           | <i>m</i> -C <sub>6</sub> H <sub>4</sub> Cl <sub>2</sub> |           |           |           |
| 6                                                       | -0.028095 | 0.692723  | 0.000002  | 6                                                       | 1.186501  | -0.001111 | 0.000000  |

|                |           |           |           |                |            |           |           |
|----------------|-----------|-----------|-----------|----------------|------------|-----------|-----------|
| 6              | -0.028095 | -0.692723 | -0.000002 | 6              | 0.000000   | -0.709898 | 0.000000  |
| 6              | 1.174631  | -1.381768 | -0.000002 | 6              | -1.186501  | -0.001111 | 0.000000  |
| 6              | 2.371451  | -0.692687 | 0.000001  | 6              | -1.204076  | 1.380413  | 0.000000  |
| 6              | 2.371451  | 0.692687  | 0.000004  | 6              | 0.000000   | 2.063542  | 0.000000  |
| 6              | 1.174631  | 1.381768  | 0.000004  | 6              | 1.204075   | 1.380413  | 0.000000  |
| 17             | -1.503884 | 1.606099  | 0.000002  | 17             | 2.692049   | -0.877847 | 0.000000  |
| 17             | -1.503884 | -1.606099 | -0.000005 | 17             | -2.692049  | -0.877847 | 0.000000  |
| 1              | 1.160068  | -2.455111 | -0.000004 | 1              | 0.000000   | -1.781991 | 0.000001  |
| 1              | 3.298033  | -1.237018 | 0.000001  | 1              | -2.138307  | 1.908457  | 0.000000  |
| 1              | 3.298033  | 1.237018  | 0.000006  | 1              | 0.000000   | 3.138388  | 0.000000  |
| 1              | 1.160068  | 2.455111  | 0.000007  | 1              | 2.138307   | 1.908457  | 0.000000  |
|                |           |           |           |                |            |           |           |
| $C_6H_3Cl_3$   |           |           |           | $C_6H_5Br$     |            |           |           |
| 6              | -1.184970 | -0.684143 | 0.000000  | 6              | -0.103038  | 0.000000  | 0.000000  |
| 17             | -2.690918 | -1.553602 | 0.000000  | 6              | -0.780695  | -1.205369 | 0.000001  |
| 6              | 1.184971  | -0.684144 | 0.000000  | 6              | -2.166443  | -1.198233 | 0.000001  |
| 6              | 0.000000  | 1.368286  | 0.000000  | 6              | -2.861257  | 0.000000  | 0.000000  |
| 17             | 2.690918  | -1.553602 | 0.000000  | 6              | -2.1664430 | 1.198233  | 0.000000  |
| 17             | 0.000000  | 3.107204  | 0.000000  | 6              | -0.780695  | 1.205369  | 0.000000  |
| 6              | 1.207554  | 0.697181  | 0.000000  | 35             | 1.798983   | 0.000000  | 0.000000  |
| 1              | 2.135724  | 1.233061  | 0.000000  | 1              | -0.239061  | -2.132104 | 0.000001  |
| 6              | -1.207554 | 0.697181  | 0.000000  | 1              | -2.699294  | -2.132146 | 0.000001  |
| 6              | 0.000000  | -1.394363 | 0.000000  | 1              | -3.936258  | 0.000000  | 0.000000  |
| 1              | -2.135725 | 1.233059  | 0.000000  | 1              | -2.699294  | 2.132146  | 0.000000  |
| 1              | 0.000001  | -2.466122 | 0.000000  | 1              | -0.239061  | 2.132104  | -0.000001 |
|                |           |           |           |                |            |           |           |
| $o-C_6H_4Br_2$ |           |           |           | $m-C_6H_4Br_2$ |            |           |           |
| 6              | 0.538126  | -0.693267 | -0.000013 | 6              | 1.187510   | 0.335439  | -0.000002 |
| 6              | 0.538126  | 0.693266  | 0.000015  | 6              | 0.000000   | -0.373640 | 0.000001  |
| 6              | 1.743613  | 1.381177  | 0.000027  | 6              | -1.187510  | 0.335439  | 0.000000  |
| 6              | 2.940573  | 0.692494  | 0.000017  | 6              | -1.204056  | 1.717618  | 0.000002  |
| 6              | 2.940572  | -0.692497 | -0.000009 | 6              | 0.000000   | 2.401262  | 0.000000  |
| 6              | 1.743612  | -1.381179 | -0.000022 | 6              | 1.204056   | 1.717618  | 0.000000  |
| 35             | -1.055310 | -1.716859 | -0.000033 | 35             | 2.828744   | -0.619042 | -0.000002 |
| 35             | -1.055308 | 1.716860  | 0.000030  | 1              | 0.000000   | -1.445436 | 0.000000  |
| 1              | 1.735062  | 2.454299  | 0.000046  | 35             | -2.828744  | -0.619042 | 0.000002  |
| 1              | 3.866878  | 1.237459  | 0.000027  | 1              | -2.135753  | 2.249875  | 0.000002  |
| 1              | 3.866877  | -1.237462 | -0.000016 | 1              | 0.000000   | 3.476208  | 0.000001  |
| 1              | 1.735060  | -2.454301 | -0.000042 | 1              | 2.135753   | 2.249875  | -0.000001 |
|                |           |           |           |                |            |           |           |
| $p-C_6H_4Br_2$ |           |           |           | $C_6H_3Br_3$   |            |           |           |
| 6              | 0.000000  | 0.000000  | 1.373876  | 6              | 0.000000   | 0.000000  | 1.369788  |
| 35             | 0.000000  | 0.000000  | 3.272178  | 35             | 0.000000   | 0.000000  | 3.265594  |
| 6              | 0.000000  | 1.202678  | 0.692556  | 6              | 0.000000   | -1.186272 | -0.684894 |
| 6              | 0.000000  | -1.202678 | 0.692556  | 6              | 0.000000   | 1.186272  | -0.684894 |
| 6              | 0.000000  | 0.000000  | -1.373876 | 35             | 0.000000   | -2.828087 | -1.632797 |

|               |           |           |           |               |           |           |           |
|---------------|-----------|-----------|-----------|---------------|-----------|-----------|-----------|
| 6             | 0.000000  | -1.202678 | -0.692556 | 35            | 0.000000  | 2.828087  | -1.632797 |
| 6             | 0.000000  | 1.202678  | -0.692556 | 6             | 0.000000  | 0.000000  | -1.394762 |
| 35            | 0.000000  | 0.000000  | -3.272178 | 1             | 0.000000  | 0.000000  | -2.466297 |
| 1             | 0.000000  | 2.132291  | 1.228962  | 6             | 0.000000  | 1.207899  | 0.697381  |
| 1             | 0.000000  | -2.132291 | 1.228962  | 6             | 0.000000  | -1.207899 | 0.697381  |
| 1             | 0.000000  | -2.132291 | -1.228962 | 1             | 0.000000  | 2.135876  | 1.233149  |
| 1             | 0.000000  | 2.132291  | -1.228962 | 1             | 0.000000  | -2.135876 | 1.233149  |
|               |           |           |           |               |           |           |           |
| $C_6H_2Br_4$  |           |           |           | $C_6H_5I$     |           |           |           |
| 6             | 0.000000  | 0.000000  | 1.375022  | 6             | -0.566562 | 0.000000  | 0.000000  |
| 1             | 0.000000  | 0.000000  | 2.446568  | 6             | -1.250500 | 1.204424  | 0.000001  |
| 6             | 0.000000  | 1.203798  | 0.693365  | 6             | -2.636453 | 1.197943  | -0.000001 |
| 6             | 0.000000  | -1.203798 | 0.693365  | 6             | -3.331254 | 0.000000  | 0.000000  |
| 6             | 0.000000  | 0.000000  | -1.375022 | 6             | -2.636453 | -1.197943 | -0.000001 |
| 6             | 0.000000  | -1.203798 | -0.693365 | 6             | -1.250500 | -1.204424 | 0.000001  |
| 6             | 0.000000  | 1.203798  | -0.693365 | 53            | 1.551084  | 0.000000  | 0.000000  |
| 1             | 0.000000  | 0.000000  | -2.446568 | 1             | -0.716498 | 2.135565  | 0.000000  |
| 35            | 0.000000  | 2.789603  | 1.719980  | 1             | -3.168881 | 2.132191  | 0.000000  |
| 35            | 0.000000  | -2.789603 | 1.719980  | 1             | -4.406337 | 0.000000  | 0.000000  |
| 35            | 0.000000  | -2.789603 | -1.719980 | 1             | -3.168881 | -2.132191 | 0.000000  |
| 35            | 0.000000  | 2.789603  | -1.719980 | 1             | -0.716497 | -2.135565 | 0.000000  |
|               |           |           |           |               |           |           |           |
| $o-C_6H_4I_2$ |           |           |           | $m-C_6H_4I_2$ |           |           |           |
| 6             | 0.695180  | 0.911120  | 0.000001  | 6             | -1.192803 | 0.565796  | 0.000014  |
| 6             | -0.695180 | 0.911120  | -0.000001 | 6             | 0.000000  | -0.139193 | -0.000002 |
| 6             | -1.378794 | 2.122630  | 0.000001  | 6             | 1.192803  | 0.565796  | 0.000013  |
| 6             | -0.691853 | 3.320638  | 0.000000  | 6             | 1.203537  | 1.950059  | 0.000046  |
| 6             | 0.691853  | 3.320638  | 0.000000  | 6             | 0.000000  | 2.634478  | 0.000062  |
| 6             | 1.378794  | 2.122629  | -0.000001 | 6             | -1.203537 | 1.950059  | 0.000048  |
| 53            | 1.884077  | -0.839573 | 0.000000  | 53            | -3.022179 | -0.496606 | -0.000010 |
| 53            | -1.884078 | -0.839573 | 0.000000  | 53            | 3.022179  | -0.496606 | -0.000014 |
| 1             | -2.451767 | 2.124826  | 0.000001  | 1             | 0.000000  | -1.210923 | -0.000027 |
| 1             | -1.238361 | 4.246198  | 0.000001  | 1             | 2.130997  | 2.489813  | 0.000058  |
| 1             | 1.238362  | 4.246197  | 0.000000  | 1             | 0.000000  | 3.709601  | 0.000088  |
| 1             | 2.451767  | 2.124825  | -0.000002 | 1             | -2.130997 | 2.489814  | 0.000061  |
|               |           |           |           |               |           |           |           |
| $p-C_6H_4I_2$ |           |           |           | $C_6H_3I_3$   |           |           |           |
| 6             | 0.000000  | 0.000000  | 1.380707  | 6             | 0.000000  | 1.375775  | 0.000000  |
| 53            | 0.000000  | 0.000000  | 3.494757  | 53            | 0.000000  | 3.489754  | 0.000000  |
| 6             | 0.000000  | 1.201222  | 0.692830  | 6             | 1.191456  | -0.687888 | 0.000000  |
| 6             | 0.000000  | -1.201222 | 0.692830  | 6             | -1.191456 | -0.687888 | 0.000000  |
| 6             | 0.000000  | 0.000000  | -1.380707 | 53            | 3.022216  | -1.744877 | 0.000000  |
| 6             | 0.000000  | -1.201222 | -0.692830 | 53            | -3.022216 | -1.744877 | 0.000000  |
| 6             | 0.000000  | 1.201222  | -0.692830 | 6             | 0.000000  | -1.393318 | 0.000000  |
| 53            | 0.000000  | 0.000000  | -3.494757 | 1             | 0.000000  | -2.464868 | 0.000000  |
| 1             | 0.000000  | 2.135603  | 1.221040  | 6             | -1.206649 | 0.696659  | 0.000000  |

|                  |           |           |           |                  |           |           |           |
|------------------|-----------|-----------|-----------|------------------|-----------|-----------|-----------|
| 1                | 0.000000  | -2.135603 | 1.221040  | 6                | 1.206649  | 0.696659  | 0.000000  |
| 1                | 0.000000  | -2.135603 | -1.221040 | 1                | -2.134638 | 1.232434  | 0.000000  |
| 1                | 0.000000  | 2.135603  | -1.221040 | 1                | 2.134638  | 1.232434  | 0.000000  |
| $C_6H_2I_4$      |           |           |           | $m-C_6H_4(CN)_2$ |           |           |           |
| 6                | 0.000000  | 0.000000  | 1.370685  | 6                | 1.195831  | -0.054836 | -0.000006 |
| 1                | 0.000000  | 0.000000  | 2.441817  | 6                | 0.000000  | -0.756561 | -0.000002 |
| 6                | 0.000000  | 1.210647  | 0.694652  | 6                | -1.195831 | -0.054836 | 0.000005  |
| 6                | 0.000000  | -1.210647 | 0.694652  | 6                | -1.198229 | 1.335037  | 0.000009  |
| 6                | 0.000000  | 0.000000  | -1.370685 | 6                | 0.000000  | 2.025701  | 0.000005  |
| 6                | 0.000000  | -1.210647 | -0.694652 | 6                | 1.198229  | 1.335037  | -0.000002 |
| 6                | 0.000000  | 1.210647  | -0.694652 | 6                | 2.446473  | -0.774486 | -0.000012 |
| 1                | 0.000000  | 0.000000  | -2.441817 | 1                | 0.000000  | -1.830047 | -0.000005 |
| 53               | 0.000000  | 2.953941  | 1.887624  | 6                | -2.446473 | -0.774485 | 0.000008  |
| 53               | 0.000000  | -2.953941 | 1.887624  | 1                | -2.132444 | 1.865073  | 0.000014  |
| 53               | 0.000000  | -2.953941 | -1.887624 | 1                | 0.000000  | 3.099660  | 0.000008  |
| 53               | 0.000000  | 2.953941  | -1.887624 | 1                | 2.132444  | 1.865073  | -0.000005 |
|                  |           |           |           | 7                | 3.428265  | -1.334513 | -0.000014 |
|                  |           |           |           | 7                | -3.428265 | -1.334513 | 0.000009  |
| $p-C_6H_4(CN)_2$ |           |           |           | $C_6H_3(CN)_3$   |           |           |           |
| 6                | 1.377470  | 0.000000  | 0.000010  | 6                | -0.150956 | 1.375102  | -0.000006 |
| 6                | 0.690397  | 1.207226  | 0.000000  | 6                | -1.272887 | 0.559692  | -0.000001 |
| 6                | -0.690397 | 1.207226  | -0.000002 | 6                | -1.115395 | -0.818283 | 0.000007  |
| 6                | -1.377470 | 0.000000  | -0.000009 | 6                | 0.151735  | -1.382199 | 0.000011  |
| 6                | -0.690397 | -1.207226 | 0.000002  | 6                | 1.266352  | -0.556819 | 0.000005  |
| 6                | 0.690397  | -1.207226 | 0.000003  | 6                | 1.121151  | 0.822506  | -0.000003 |
| 6                | 2.821131  | 0.000000  | 0.000010  | 6                | -0.308354 | 2.808878  | -0.000016 |
| 1                | 1.232702  | 2.133840  | 0.000004  | 1                | -2.255600 | 0.991795  | -0.000004 |
| 1                | -1.232703 | 2.133840  | -0.000008 | 6                | -2.278383 | -1.671482 | 0.000008  |
| 6                | -2.821131 | 0.000000  | -0.000010 | 1                | 0.268880  | -2.449305 | 0.000018  |
| 1                | -1.232702 | -2.133840 | -0.000003 | 6                | 2.586737  | -1.137397 | 0.000006  |
| 1                | 1.232703  | -2.133840 | 0.000011  | 1                | 1.986720  | 1.457509  | -0.000007 |
| 7                | 3.951383  | -0.000001 | 0.000007  | 7                | -0.431632 | 3.931831  | -0.000024 |
| 7                | -3.951383 | 0.000000  | -0.000009 | 7                | -3.189250 | -2.339718 | 0.000008  |
|                  |           |           |           | 7                | 3.620882  | -1.592110 | 0.000005  |
| $C_6H_5OH$       |           |           |           |                  |           |           |           |
|                  |           |           |           | 6                | 0.934018  | -0.024350 | -0.000001 |
|                  |           |           |           | 6                | 0.219791  | -1.213932 | 0.000000  |
|                  |           |           |           | 6                | -1.161331 | -1.179831 | 0.000001  |
|                  |           |           |           | 6                | -1.843925 | 0.029299  | 0.000002  |
|                  |           |           |           | 6                | -1.121867 | 1.208387  | 0.000001  |
|                  |           |           |           | 6                | 0.265163  | 1.188431  | 0.000000  |
|                  |           |           |           | 8                | 2.282560  | -0.107551 | -0.000002 |
|                  |           |           |           | 1                | 0.756340  | -2.144688 | -0.000001 |

|                                                                          |           |           |           |           |                                                                          |           |           |  |
|--------------------------------------------------------------------------|-----------|-----------|-----------|-----------|--------------------------------------------------------------------------|-----------|-----------|--|
|                                                                          | 1         | -1.710063 | -2.105051 | 0.000001  |                                                                          |           |           |  |
|                                                                          | 1         | -2.918362 | 0.048250  | 0.000003  |                                                                          |           |           |  |
|                                                                          | 1         | -1.633656 | 2.154478  | 0.000002  |                                                                          |           |           |  |
|                                                                          | 1         | 0.819743  | 2.111909  | -0.000001 |                                                                          |           |           |  |
|                                                                          | 1         | 2.674423  | 0.747485  | -0.000001 |                                                                          |           |           |  |
| <i>m</i> -C <sub>6</sub> H <sub>4</sub> (OH) <sub>2</sub>                |           |           |           |           | <i>p</i> -C <sub>6</sub> H <sub>4</sub> (OH) <sub>2</sub>                |           |           |  |
| 6                                                                        | -1.185866 | -0.318940 | 0.000001  | 6         | 1.390568                                                                 | -0.026289 | 0.000001  |  |
| 6                                                                        | 0.024640  | -0.997910 | -0.000003 | 6         | 0.672759                                                                 | -1.207524 | 0.000001  |  |
| 6                                                                        | 1.205835  | -0.279764 | -0.000004 | 6         | -0.711504                                                                | -1.180362 | 0.000000  |  |
| 6                                                                        | 1.194582  | 1.110664  | 0.000003  | 6         | -1.390568                                                                | 0.026289  | -0.000001 |  |
| 6                                                                        | -0.019951 | 1.762277  | 0.000007  | 6         | -0.672759                                                                | 1.207524  | -0.000001 |  |
| 6                                                                        | -1.220526 | 1.064255  | 0.000009  | 6         | 0.711504                                                                 | 1.180362  | 0.000000  |  |
| 8                                                                        | -2.304246 | -1.071614 | -0.000001 | 8         | 2.744891                                                                 | -0.107863 | 0.000003  |  |
| 1                                                                        | 0.021517  | -2.073579 | -0.000008 | 1         | 1.201288                                                                 | -2.142893 | 0.000001  |  |
| 8                                                                        | 2.407132  | -0.889247 | -0.000010 | 1         | -1.258405                                                                | -2.108416 | -0.000001 |  |
| 1                                                                        | 2.124532  | 1.646596  | 0.000002  | 8         | -2.744891                                                                | 0.107863  | -0.000002 |  |
| 1                                                                        | -0.040301 | 2.837730  | 0.000013  | 1         | -1.201288                                                                | 2.142893  | -0.000002 |  |
| 1                                                                        | -2.160277 | 1.588545  | 0.000011  | 1         | 1.258405                                                                 | 2.108416  | 0.000000  |  |
| 1                                                                        | -3.073841 | -0.530564 | 0.000003  | 1         | 3.134423                                                                 | 0.747868  | 0.000005  |  |
| 1                                                                        | 2.312991  | -1.825323 | -0.000013 | 1         | -3.134423                                                                | -0.747868 | 0.000001  |  |
| C <sub>6</sub> H <sub>3</sub> (OH) <sub>3</sub>                          |           |           |           |           | <i>o</i> -C <sub>6</sub> H <sub>4</sub> (OCH <sub>3</sub> ) <sub>2</sub> |           |           |  |
| 6                                                                        | 1.271195  | -0.524531 | -0.000003 | 6         | -0.705110                                                                | -0.125386 | 0.000001  |  |
| 6                                                                        | 1.103156  | 0.855115  | 0.000009  | 6         | 0.705110                                                                 | -0.125386 | 0.000000  |  |
| 6                                                                        | -0.181340 | 1.363153  | 0.000010  | 6         | 1.380998                                                                 | 1.073916  | -0.000001 |  |
| 6                                                                        | -1.292129 | 0.527804  | 0.000003  | 6         | 0.684989                                                                 | 2.285115  | -0.000001 |  |
| 6                                                                        | -1.089855 | -0.838622 | -0.000007 | 6         | -0.684991                                                                | 2.285114  | 0.000000  |  |
| 6                                                                        | 0.188973  | -1.382918 | -0.000010 | 6         | -1.380999                                                                | 1.073915  | 0.000001  |  |
| 8                                                                        | 2.536601  | -0.978894 | -0.000006 | 8         | -1.290007                                                                | -1.335214 | 0.000001  |  |
| 1                                                                        | 1.966591  | 1.494935  | 0.000014  | 8         | 1.290008                                                                 | -1.335213 | -0.000001 |  |
| 8                                                                        | -0.420554 | 2.686208  | 0.000020  | 1         | 2.453507                                                                 | 1.089367  | -0.000002 |  |
| 1                                                                        | -2.277947 | 0.955651  | 0.000004  | 1         | 1.234141                                                                 | 3.209181  | -0.000001 |  |
| 8                                                                        | -2.116047 | -1.707314 | -0.000016 | 1         | -1.234143                                                                | 3.209180  | 0.000001  |  |
| 1                                                                        | 0.311356  | -2.450585 | -0.000019 | 1         | -2.453508                                                                | 1.089365  | 0.000002  |  |
| 1                                                                        | 2.557218  | -1.919636 | -0.000008 | 6         | -2.683631                                                                | -1.430891 | 0.000002  |  |
| 1                                                                        | 0.383845  | 3.174434  | 0.000023  | 6         | 2.683631                                                                 | -1.430890 | -0.000002 |  |
| 1                                                                        | -2.941063 | -1.254798 | -0.000006 | 1         | -2.912471                                                                | -2.486640 | 0.000002  |  |
|                                                                          |           |           |           | 1         | -3.114012                                                                | -0.973361 | -0.886567 |  |
|                                                                          |           |           |           | 1         | -3.114011                                                                | -0.973360 | 0.886572  |  |
|                                                                          |           |           |           | 1         | 2.912472                                                                 | -2.486639 | -0.000002 |  |
|                                                                          |           |           |           | 1         | 3.114013                                                                 | -0.973359 | 0.886567  |  |
|                                                                          |           |           |           | 1         | 3.114011                                                                 | -0.973360 | -0.886572 |  |
| <i>m</i> -C <sub>6</sub> H <sub>4</sub> (OCH <sub>3</sub> ) <sub>2</sub> |           |           |           |           | C <sub>6</sub> H <sub>3</sub> (OCH <sub>3</sub> ) <sub>3</sub>           |           |           |  |
| 6                                                                        | 1.052989  | -0.212240 | 0.009942  | 6         | 0.111721                                                                 | 1.374499  | 0.000005  |  |



|   |           |           |           |   |           |           |           |
|---|-----------|-----------|-----------|---|-----------|-----------|-----------|
| 6 | -0.281397 | -0.652733 | -0.006222 | 6 | -1.158836 | 0.780625  | 0.000010  |
| 6 | -1.317046 | 0.280842  | -0.011174 | 6 | -1.246211 | -0.590497 | 0.000004  |
| 6 | -1.029090 | 1.656286  | -0.002044 | 6 | -0.096623 | -1.393894 | -0.000006 |
| 6 | 0.295253  | 2.073316  | 0.004434  | 6 | 1.134491  | -0.784002 | -0.000009 |
| 6 | 1.354636  | 1.151220  | 0.016686  | 6 | 1.255459  | 0.613269  | -0.000004 |
| 8 | 1.981474  | -1.214451 | 0.017317  | 8 | 0.102519  | 2.716974  | 0.000011  |
| 1 | -0.454644 | -1.721665 | -0.014394 | 1 | -2.016459 | 1.421263  | 0.000017  |
| 8 | -2.641696 | -0.045037 | -0.023574 | 8 | -2.404228 | -1.269703 | 0.000007  |
| 1 | -1.851381 | 2.363747  | -0.008478 | 1 | -0.222620 | -2.456936 | -0.000009 |
| 1 | 0.520262  | 3.136027  | 0.010417  | 8 | 2.301709  | -1.447271 | -0.000019 |
| 1 | 2.376305  | 1.509116  | 0.026503  | 1 | 2.239079  | 1.035674  | -0.000008 |
| 6 | 3.341561  | -0.815858 | -0.019770 | 6 | 1.310478  | 3.425605  | 0.000008  |
| 6 | -2.955125 | -1.427291 | 0.015877  | 6 | -3.621901 | -0.577895 | 0.000017  |
| 1 | 3.921108  | -1.737980 | -0.029456 | 6 | 2.311423  | -2.847710 | -0.000025 |
| 1 | 3.608018  | -0.227664 | 0.865073  | 1 | 1.044582  | 4.472642  | 0.000013  |
| 1 | 3.559161  | -0.236313 | -0.923456 | 1 | 1.896883  | 3.204943  | -0.886368 |
| 1 | -4.042686 | -1.485084 | 0.018888  | 1 | 1.896892  | 3.204936  | 0.886375  |
| 1 | -2.560095 | -1.896608 | 0.923395  | 1 | -4.395713 | -1.331687 | 0.000018  |
| 1 | -2.564954 | -1.948919 | -0.864806 | 1 | -3.724008 | 0.040287  | -0.886351 |
|   |           |           |           | 1 | -3.723998 | 0.040279  | 0.886392  |
|   |           |           |           | 1 | 3.351131  | -3.140955 | -0.000032 |
|   |           |           |           | 1 | 1.827111  | -3.245219 | -0.886396 |
|   |           |           |           | 1 | 1.827120  | -3.245227 | 0.886347  |

**Table S8.** MP2(full)/6-311++G\*\* Optimized Structures for All Na<sup>+</sup>-Substituted Benzene Complexes.

| <b>C<sub>6</sub>H<sub>6</sub></b> |           |           |           |            |           |           |           |
|-----------------------------------|-----------|-----------|-----------|------------|-----------|-----------|-----------|
| 11                                | 0.000000  | 0.000000  | 1.907003  |            |           |           |           |
| 6                                 | 0.000000  | 1.404744  | -0.494199 |            |           |           |           |
| 6                                 | 0.000000  | -1.404744 | -0.494199 |            |           |           |           |
| 6                                 | 1.216544  | 0.702372  | -0.494199 |            |           |           |           |
| 6                                 | -1.216544 | 0.702372  | -0.494199 |            |           |           |           |
| 6                                 | 1.216544  | -0.702372 | -0.494199 |            |           |           |           |
| 6                                 | -1.216544 | -0.702372 | -0.494199 |            |           |           |           |
| 1                                 | 0.000000  | 2.490473  | -0.530980 |            |           |           |           |
| 1                                 | 2.156813  | 1.245237  | -0.530980 |            |           |           |           |
| 1                                 | 2.156813  | -1.245237 | -0.530980 |            |           |           |           |
| 1                                 | 0.000000  | -2.490473 | -0.530980 |            |           |           |           |
| 1                                 | -2.156813 | -1.245237 | -0.530980 |            |           |           |           |
| 1                                 | -2.156813 | 1.245237  | -0.530980 |            |           |           |           |
| <b>F1</b>                         |           |           |           | <b>F2o</b> |           |           |           |
| 11                                | -2.008533 | -0.423690 | 0.000000  | 11         | 2.094070  | -0.697085 | 0.000000  |
| 6                                 | 0.443509  | 1.037810  | 0.000000  | 6          | -0.392746 | 0.678040  | 0.701534  |
| 6                                 | 0.425854  | -1.753292 | 0.000000  | 6          | -0.392746 | 0.678040  | -0.701534 |
| 6                                 | 0.430763  | -1.045723 | 1.212654  | 6          | -0.382933 | -1.740736 | -0.701752 |
| 6                                 | 0.430763  | -1.045723 | -1.212654 | 6          | -0.382933 | -1.740736 | 0.701752  |
| 6                                 | 0.430763  | 0.359154  | 1.221071  | 6          | -0.382933 | -0.526047 | -1.407059 |
| 6                                 | 0.430763  | 0.359154  | -1.221071 | 6          | -0.382933 | -0.526047 | 1.407059  |
| 9                                 | 0.466460  | 2.372081  | 0.000000  | 9          | -0.413251 | 1.837534  | 1.347412  |
| 1                                 | 0.464964  | -2.838332 | 0.000000  | 9          | -0.413251 | 1.837534  | -1.347412 |
| 1                                 | 0.464679  | -1.574455 | 2.160984  | 1          | -0.424054 | -2.677226 | -1.249540 |
| 1                                 | 0.464679  | -1.574455 | -2.160984 | 1          | -0.424054 | -2.677226 | 1.249540  |
| 1                                 | 0.473461  | 0.915408  | 2.152718  | 1          | -0.422399 | -0.494154 | -2.492151 |
| 1                                 | 0.473461  | 0.915408  | -2.152718 | 1          | -0.422399 | -0.494154 | 2.492151  |
| <b>F2m</b>                        |           |           |           | <b>F2p</b> |           |           |           |
| 11                                | 0.000000  | 0.000000  | 0.000000  | 11         | 0.000000  | 0.000000  | 0.000000  |
| 0                                 | 0.000000  | 0.000000  | 2.237349  | 0          | 0.000000  | 0.000000  | 2.230622  |
| 6                                 | 1.431566  | 0.000000  | 2.528022  | 6          | 1.386756  | 0.000000  | 2.487667  |
| 6                                 | -1.373972 | 0.000000  | 2.441543  | 6          | -1.386756 | 0.000000  | 2.487667  |
| 1                                 | 2.514194  | 0.000000  | 2.608064  | 9          | 2.721280  | 0.000000  | 2.506588  |
| 1                                 | -2.460078 | 0.000000  | 2.439079  | 9          | -2.721280 | 0.000000  | 2.506588  |
| 6                                 | 0.708487  | 1.195993  | 2.519543  | 6          | 0.702747  | 1.217694  | 2.480330  |
| 6                                 | 0.708487  | -1.195993 | 2.519543  | 6          | 0.702747  | -1.217694 | 2.480330  |
| 9                                 | 1.387257  | 2.341821  | 2.559960  | 6          | -0.702747 | -1.217694 | 2.480330  |
| 9                                 | 1.387257  | -2.341821 | 2.559960  | 6          | -0.702747 | 1.217694  | 2.480330  |
| 6                                 | -0.686835 | 1.224382  | 2.457067  | 1          | 1.245159  | 2.157565  | 2.519201  |
| 6                                 | -0.686835 | -1.224382 | 2.457067  | 1          | 1.245159  | -2.157565 | 2.519201  |
| 1                                 | -1.217582 | 2.170513  | 2.486900  | 1          | -1.245159 | -2.157565 | 2.519201  |

|             |           |           |           |             |           |           |           |
|-------------|-----------|-----------|-----------|-------------|-----------|-----------|-----------|
| 1           | -1.217582 | -2.170513 | 2.486900  | 1           | -1.245159 | 2.157565  | 2.519201  |
| <b>F3</b>   |           |           |           | <b>F4</b>   |           |           |           |
| 11          | 0.000000  | 0.000000  | 2.185553  | 11          | 0.000000  | 0.000000  | 2.259108  |
| 6           | 0.000000  | -1.375965 | -0.360902 | 6           | 0.000000  | 1.401284  | -0.317652 |
| 6           | -1.191620 | 0.687982  | -0.360902 | 6           | 0.000000  | -1.401284 | -0.317652 |
| 6           | 1.191620  | 0.687982  | -0.360902 | 1           | 0.000000  | 2.486725  | -0.361009 |
| 6           | 0.000000  | 1.417104  | -0.340812 | 1           | 0.000000  | -2.486725 | -0.361009 |
| 6           | -1.227248 | -0.708552 | -0.340812 | 6           | 1.208091  | 0.699930  | -0.327062 |
| 6           | 1.227248  | -0.708552 | -0.340812 | 6           | -1.208091 | 0.699930  | -0.327062 |
| 9           | 0.000000  | -2.706615 | -0.378840 | 6           | -1.208091 | -0.699930 | -0.327062 |
| 9           | -2.343998 | 1.353308  | -0.378840 | 6           | 1.208091  | -0.699930 | -0.327062 |
| 9           | 2.343998  | 1.353308  | -0.378840 | 9           | 2.355854  | 1.364909  | -0.346302 |
| 1           | 0.000000  | 2.500805  | -0.393850 | 9           | -2.355854 | 1.364909  | -0.346302 |
| 1           | -2.165761 | -1.250403 | -0.393850 | 9           | -2.355854 | -1.364909 | -0.346302 |
| 1           | 2.165761  | -1.250403 | -0.393850 | 9           | 2.355854  | -1.364909 | -0.346302 |
| <b>C11</b>  |           |           |           | <b>C12o</b> |           |           |           |
| 11          | -2.041774 | -0.693552 | 0.000000  | 11          | 1.298696  | 0.003328  | 1.929971  |
| 6           | 0.382377  | 0.659778  | 0.000000  | 6           | 0.965923  | -1.399781 | -0.493194 |
| 6           | 0.371048  | -2.148990 | 0.000000  | 6           | 0.972777  | 1.396203  | -0.479411 |
| 6           | 0.379454  | -1.441887 | 1.212851  | 6           | -0.234259 | -0.706222 | -0.256751 |
| 6           | 0.379454  | -1.441887 | -1.212851 | 6           | -0.237776 | 0.705634  | -0.291543 |
| 6           | 0.379454  | -0.038510 | 1.218837  | 6           | 2.167453  | 0.698022  | -0.693617 |
| 6           | 0.379454  | -0.038510 | -1.218837 | 6           | 2.166110  | -0.705663 | -0.688561 |
| 17          | 0.398026  | 2.382098  | 0.000000  | 1           | 0.943347  | -2.485594 | -0.520294 |
| 1           | 0.402380  | -3.234443 | 0.000000  | 1           | 0.952652  | 2.481906  | -0.512646 |
| 1           | 0.413341  | -1.977302 | 2.157637  | 17          | -1.682826 | -1.598007 | -0.027912 |
| 1           | 0.413341  | -1.977302 | -2.157637 | 17          | -1.678831 | 1.600836  | -0.031630 |
| 1           | 0.418282  | 0.511244  | 2.154847  | 1           | 3.085546  | 1.247897  | -0.878263 |
| 1           | 0.418282  | 0.511244  | -2.154847 | 1           | 3.079606  | -1.258060 | -0.887801 |
| <b>C12m</b> |           |           |           | <b>C12p</b> |           |           |           |
| 11          | 2.125135  | 0.581749  | 0.000000  | 11          | 0.000000  | 0.000000  | 2.126043  |
| 6           | -0.291431 | -0.806751 | 0.000000  | 6           | 0.000000  | 1.403234  | -0.305885 |
| 6           | -0.330414 | 1.996682  | 0.000000  | 6           | 0.000000  | -1.403234 | -0.305885 |
| 1           | -0.319583 | -1.892515 | 0.000000  | 6           | 1.215974  | 0.7007010 | -0.313943 |
| 1           | -0.368245 | 3.082574  | 0.000000  | 6           | -1.215974 | -0.700701 | -0.313943 |
| 6           | -0.315714 | -0.097437 | 1.211074  | 6           | -1.215974 | 0.700701  | -0.313943 |
| 6           | -0.315714 | -0.097437 | -1.211074 | 6           | 1.215974  | -0.700701 | -0.313943 |
| 17          | -0.315714 | -0.968373 | 2.695074  | 17          | 0.000000  | 3.124240  | -0.317082 |
| 17          | -0.315714 | -0.968373 | -2.695074 | 17          | 0.000000  | -3.124240 | -0.317082 |
| 6           | -0.310690 | 1.306624  | 1.220892  | 1           | 2.154482  | 1.246590  | -0.350109 |
| 6           | -0.310690 | 1.306624  | -1.220892 | 1           | -2.154482 | -1.246590 | -0.350109 |
| 1           | -0.353239 | 1.842777  | 2.163991  | 1           | -2.154482 | 1.246590  | -0.350109 |
| 1           | -0.353239 | 1.842777  | -2.163991 | 1           | 2.154482  | -1.246590 | -0.350109 |

| <b>CI3</b>  |           |           |           | <b>CI4</b>  |           |           |           |
|-------------|-----------|-----------|-----------|-------------|-----------|-----------|-----------|
| 11          | 0.000000  | 0.000000  | 2.190721  | 0           | 0.000000  | 0.000000  | 0.000000  |
| 6           | 0.000000  | -1.394140 | -0.261953 | 11          | 0.000000  | 0.000000  | 2.457507  |
| 6           | -1.207361 | 0.697070  | -0.261953 | 6           | 1.390741  | 0.000000  | 0.000000  |
| 6           | 1.207361  | 0.697070  | -0.261953 | 6           | -1.390741 | 0.000000  | 0.000000  |
| 6           | 0.000000  | 1.411792  | -0.258689 | 6           | 0.705764  | -1.223538 | 0.005047  |
| 6           | -1.222648 | -0.705896 | -0.258689 | 6           | -0.705764 | 1.223538  | 0.005047  |
| 6           | 1.222648  | -0.705896 | -0.258689 | 6           | -0.706013 | -1.223604 | 0.005107  |
| 17          | 0.000000  | -3.113735 | -0.271520 | 6           | 0.706013  | 1.223604  | 0.005107  |
| 17          | -2.696574 | 1.556868  | -0.271520 | 1           | 2.476792  | -0.000060 | -0.031210 |
| 17          | 2.696574  | 1.556868  | -0.271520 | 1           | -2.476792 | 0.000060  | -0.031210 |
| 1           | 0.000000  | 2.496907  | -0.292958 | 17          | 1.606257  | -2.681410 | -0.005491 |
| 1           | -2.162385 | -1.248453 | -0.292958 | 17          | -1.606257 | 2.681410  | -0.005491 |
| 1           | 2.162385  | -1.248453 | -0.292958 | 17          | -1.606598 | -2.681444 | -0.005309 |
|             |           |           |           | 17          | 1.606598  | 2.681444  | -0.005309 |
| <b>Br1</b>  |           |           |           | <b>Br2o</b> |           |           |           |
| 11          | 2.121998  | 1.240286  | 0.000000  | 11          | 2.220247  | -1.482232 | 0.000000  |
| 6           | -0.299600 | -0.100794 | 0.000000  | 6           | -0.215810 | -0.378452 | 0.706790  |
| 6           | -0.292971 | 2.707312  | 0.000000  | 6           | -0.215810 | -0.378452 | -0.706790 |
| 6           | -0.300589 | 2.000982  | 1.213291  | 6           | -0.207859 | -2.820002 | -0.702046 |
| 6           | -0.300589 | 2.000982  | -1.213291 | 6           | -0.207859 | -2.820002 | 0.702046  |
| 6           | -0.300589 | 0.597400  | 1.220033  | 6           | -0.215810 | -1.605975 | -1.398754 |
| 6           | -0.300589 | 0.597400  | -1.220033 | 6           | -0.215810 | -1.605975 | 1.398754  |
| 35          | -0.311582 | -1.983786 | 0.000000  | 35          | -0.225444 | 1.209449  | 1.710468  |
| 1           | -0.324565 | 3.792808  | 0.000000  | 35          | -0.225444 | 1.209449  | -1.710468 |
| 1           | -0.334397 | 2.538483  | 2.157045  | 1           | -0.235765 | -3.757112 | -1.250433 |
| 1           | -0.334397 | 2.538483  | -2.157045 | 1           | -0.235765 | -3.757112 | 1.250433  |
| 1           | -0.336835 | 0.049949  | 2.157497  | 1           | -0.248179 | -1.594759 | -2.484539 |
| 1           | -0.336835 | 0.049949  | -2.157497 | 1           | -0.248179 | -1.594759 | 2.484539  |
| <b>Br2m</b> |           |           |           | <b>Br2p</b> |           |           |           |
| 11          | 0.000000  | 0.000000  | 0.000000  | 11          | 0.000000  | 0.000000  | 2.216569  |
| 0           | 0.000000  | 0.000000  | 2.840190  | 6           | 0.000000  | 1.404626  | -0.214070 |
| 6           | 1.418456  | 0.000000  | 2.393095  | 6           | 0.000000  | -1.404626 | -0.214070 |
| 6           | -1.387520 | 0.000000  | 2.484683  | 6           | 1.216692  | 0.701298  | -0.224781 |
| 1           | 2.504582  | 0.000000  | 2.396035  | 6           | -1.216692 | -0.701298 | -0.224781 |
| 1           | -2.472747 | 0.000000  | 2.543550  | 6           | -1.216692 | 0.701298  | -0.224781 |
| 6           | 0.707460  | 1.211619  | 2.426980  | 6           | 1.216692  | -0.701298 | -0.224781 |
| 6           | 0.707460  | -1.211619 | 2.426980  | 35          | 0.000000  | 3.285584  | -0.219761 |
| 35          | 1.656194  | 2.836453  | 2.404352  | 35          | 0.000000  | -3.285584 | -0.219761 |
| 35          | 1.656194  | -2.836453 | 2.404352  | 1           | 2.158085  | 1.242575  | -0.258858 |
| 6           | -0.697583 | 1.221159  | 2.451999  | 1           | -2.158085 | -1.242575 | -0.258858 |
| 6           | -0.697583 | -1.221159 | 2.451999  | 1           | -2.158085 | 1.242575  | -0.258858 |
| 1           | -1.235577 | 2.162947  | 2.501443  | 1           | 2.158085  | -1.242575 | -0.258858 |

|            |           |           |           |            |           |           |           |
|------------|-----------|-----------|-----------|------------|-----------|-----------|-----------|
| 1          | -1.235577 | -2.162947 | 2.501443  |            |           |           |           |
|            |           |           |           |            |           |           |           |
| <b>Br3</b> |           |           |           | <b>Br4</b> |           |           |           |
| 11         | 0.000000  | 0.000000  | 2.289824  | 11         | 0.000000  | 0.000000  | 2.456116  |
| 6          | 0.000000  | -1.395558 | -0.176980 | 6          | 1.391173  | 0.000000  | 0.000000  |
| 6          | -1.208589 | 0.697779  | -0.176980 | 6          | -1.391173 | 0.000000  | 0.000000  |
| 6          | 1.208589  | 0.697779  | -0.176980 | 6          | 0.706583  | -1.226681 | 0.006981  |
| 6          | 0.000000  | 1.413193  | -0.151481 | 6          | -0.706583 | 1.226681  | 0.006981  |
| 6          | -1.223861 | -0.706596 | -0.151481 | 6          | -0.706541 | -1.226681 | 0.006971  |
| 6          | 1.223861  | -0.706596 | -0.151481 | 6          | 0.706541  | 1.226681  | 0.006971  |
| 35         | 0.000000  | -3.276139 | -0.178273 | 1          | 2.477282  | 0.000010  | -0.027394 |
| 35         | -2.837220 | 1.638070  | -0.178273 | 1          | -2.477282 | -0.000010 | -0.027394 |
| 35         | 2.837220  | 1.638070  | -0.178273 | 35         | 1.716569  | -2.807149 | 0.004107  |
| 1          | 0.000000  | 2.498372  | -0.185699 | 35         | -1.716569 | 2.807149  | 0.004107  |
| 1          | -2.163653 | -1.249186 | -0.185699 | 35         | -1.716483 | -2.807173 | 0.004081  |
| 1          | 2.163653  | -1.249186 | -0.185699 | 35         | 1.716483  | 2.807173  | 0.004081  |
|            |           |           |           |            |           |           |           |
| <b>I1</b>  |           |           |           | <b>I2o</b> |           |           |           |
| 11         | 2.160468  | 1.658414  | 0.000000  | 0          | 0.000000  | 0.000000  | 0.000000  |
| 6          | -0.252565 | 0.354359  | 0.000000  | 11         | 0.000000  | 0.000000  | 2.440980  |
| 6          | -0.260393 | 1.057553  | 1.220181  | 6          | 1.396256  | 0.000000  | -0.000014 |
| 6          | -0.260393 | 1.057553  | -1.220181 | 0          | -0.000010 | 0.000000  | -1.000000 |
| 6          | -0.260393 | 2.461154  | 1.213901  | 6          | -1.396256 | 0.000000  | 0.000028  |
| 6          | -0.260393 | 2.461154  | -1.213901 | 6          | 0.708284  | -1.229737 | 0.104698  |
| 6          | -0.252177 | 3.166688  | 0.000000  | 6          | -0.708297 | -1.229755 | 0.104710  |
| 53         | -0.245791 | -1.752416 | 0.000000  | 6          | -0.701581 | 1.211777  | -0.089938 |
| 1          | -0.294382 | 0.513837  | 2.159921  | 6          | 0.701575  | 1.211775  | -0.089953 |
| 1          | -0.294382 | 0.513837  | -2.159921 | 1          | 2.482033  | -0.001546 | -0.031190 |
| 1          | -0.294968 | 3.002371  | 2.155619  | 1          | -2.482033 | -0.001526 | -0.031137 |
| 1          | -0.294968 | 3.002371  | -2.155619 | 53         | 1.878912  | -2.975287 | 0.250528  |
| 1          | -0.281651 | 4.252299  | 0.000000  | 53         | -1.878916 | -2.975312 | 0.250562  |
|            |           |           |           | 1          | -1.254585 | 2.141289  | -0.191879 |
|            |           |           |           | 1          | 1.254578  | 2.141287  | -0.191899 |
|            |           |           |           |            |           |           |           |
| <b>I2m</b> |           |           |           | <b>I2p</b> |           |           |           |
| 11         | 2.269830  | 1.048888  | 0.000000  | 11         | 0.000000  | 0.000000  | 2.244520  |
| 6          | -0.173601 | -0.226274 | 0.000000  | 6          | 0.000000  | 1.411257  | -0.172160 |
| 6          | -0.147207 | 2.580777  | 0.000000  | 6          | 0.000000  | -1.411257 | -0.172160 |
| 1          | -0.220184 | -1.311488 | 0.000000  | 53         | 0.000000  | 3.514829  | -0.162722 |
| 1          | -0.159150 | 3.667833  | 0.000000  | 53         | 0.000000  | -3.514829 | -0.162722 |
| 6          | -0.175056 | 0.482299  | 1.216542  | 6          | 1.215480  | 0.701688  | -0.187302 |
| 6          | -0.175056 | 0.482299  | -1.216542 | 6          | -1.215480 | 0.701688  | -0.187302 |
| 53         | -0.175056 | -0.578783 | 3.035613  | 6          | -1.215480 | -0.701688 | -0.187302 |
| 53         | -0.175056 | -0.578783 | -3.035613 | 6          | 1.215480  | -0.701688 | -0.187302 |
| 6          | -0.140140 | 1.889209  | 1.220909  | 1          | 2.161554  | 1.235269  | -0.220007 |
| 6          | -0.140140 | 1.889209  | -1.220909 | 1          | -2.161554 | 1.235269  | -0.220007 |

|             |           |           |           |             |           |           |           |
|-------------|-----------|-----------|-----------|-------------|-----------|-----------|-----------|
| 1           | -0.162806 | 2.435866  | 2.158894  | 1           | -2.161554 | -1.235269 | -0.220007 |
| 1           | -0.162806 | 2.435866  | -2.158894 | 1           | 2.161554  | -1.235269 | -0.220007 |
| <b>I3</b>   |           |           |           | <b>I4</b>   |           |           |           |
| 11          | 0.000000  | 0.000000  | 2.309444  | 6           | 1.388921  | 0.000177  | 0.993919  |
| 6           | 0.000000  | -1.401122 | -0.141507 | 1           | 2.475275  | 0.000328  | 1.002781  |
| 6           | -1.213407 | 0.700561  | -0.141507 | 6           | 0.708882  | -1.232717 | 0.958491  |
| 6           | 1.213407  | 0.700561  | -0.141507 | 6           | 0.708285  | 1.232665  | 0.958128  |
| 6           | 0.000000  | 1.412551  | -0.116253 | 6           | -1.387090 | -0.000501 | 0.986392  |
| 6           | -1.223305 | -0.706275 | -0.116253 | 6           | -0.707176 | 1.232741  | 1.000826  |
| 6           | 1.223305  | -0.706275 | -0.116253 | 6           | -0.706608 | -1.233501 | 1.001109  |
| 53          | 0.000000  | -3.506496 | -0.127842 | 1           | -2.472764 | -0.000691 | 1.024321  |
| 53          | -3.036714 | 1.753248  | -0.127842 | 53          | 1.884889  | -2.977036 | 0.966209  |
| 53          | 3.036714  | 1.753248  | -0.127842 | 53          | 1.883748  | 2.977356  | 0.965416  |
| 1           | 0.000000  | 2.498011  | -0.145777 | 53          | -1.882609 | 2.976790  | 0.973546  |
| 1           | -2.163341 | -1.249005 | -0.145777 | 53          | -1.881369 | -2.977968 | 0.973826  |
| 1           | 2.163341  | -1.249005 | -0.145777 | 11          | -0.009419 | -0.001835 | -1.453156 |
| <b>CN1</b>  |           |           |           | <b>CN2o</b> |           |           |           |
| 11          | 0.000000  | 0.000000  | 0.000000  | 11          | 0.000000  | 0.000000  | 2.556094  |
| 0           | 0.000000  | 0.000000  | 3.292083  | 6           | 1.407315  | 0.000000  | 0.000005  |
| 6           | 1.417416  | 0.000000  | 2.432927  | 0           | 0.000004  | 0.000000  | -1.000000 |
| 6           | -1.392190 | 0.000000  | 2.498975  | 6           | -1.407315 | 0.000000  | -0.000010 |
| 6           | -0.688028 | 1.215087  | 2.487760  | 6           | 0.709575  | -1.222847 | 0.067859  |
| 6           | -0.688028 | -1.215087 | 2.487760  | 6           | -0.709478 | -1.222956 | 0.067828  |
| 6           | 0.713834  | 1.222235  | 2.452677  | 6           | -0.702660 | 1.208728  | -0.058890 |
| 6           | 0.713834  | -1.222235 | 2.452677  | 6           | 0.702526  | 1.208654  | -0.058907 |
| 6           | 2.851894  | 0.000000  | 2.410080  | 1           | 2.493514  | -0.012790 | -0.034503 |
| 7           | 4.027914  | 0.000000  | 2.358444  | 1           | -2.493516 | -0.012963 | -0.034500 |
| 1           | -2.476707 | 0.000000  | 2.559712  | 6           | 1.430764  | -2.458402 | 0.127843  |
| 1           | -1.222799 | 2.159518  | 2.536339  | 6           | -1.429881 | -2.458917 | 0.127794  |
| 1           | -1.222799 | -2.159518 | 2.536339  | 7           | 2.038402  | -3.464361 | 0.212816  |
| 1           | 1.261683  | 2.160268  | 2.477751  | 7           | -2.036909 | -3.465240 | 0.212774  |
| 1           | 1.261683  | -2.160268 | 2.477751  | 1           | -1.247805 | 2.144799  | -0.140019 |
|             |           |           |           | 1           | 1.247660  | 2.144730  | -0.140051 |
| <b>CN2m</b> |           |           |           | <b>CN2p</b> |           |           |           |
| 11          | 0.000000  | 0.000000  | 0.000000  | 11          | 0.000000  | 0.000000  | 2.180653  |
| 0           | 0.000000  | 0.000000  | 2.796266  | 6           | 0.000000  | 1.406725  | -0.363463 |
| 6           | 1.420527  | 0.000000  | 2.507613  | 6           | 0.000000  | -1.406725 | -0.363463 |
| 6           | -1.389926 | 0.000000  | 2.606689  | 6           | 0.000000  | 2.839834  | -0.365617 |
| 1           | 2.507519  | 0.000000  | 2.512016  | 6           | 0.000000  | -2.839834 | -0.365617 |
| 1           | -2.474484 | 0.000000  | 2.672094  | 7           | 0.000000  | 4.017049  | -0.331924 |
| 6           | 0.711164  | 1.216269  | 2.537991  | 7           | 0.000000  | -4.017049 | -0.331924 |
| 6           | 0.711164  | -1.216269 | 2.537991  | 6           | 1.220642  | 0.699671  | -0.373081 |
| 6           | 1.435237  | 2.454615  | 2.521506  | 6           | -1.220642 | 0.699671  | -0.373081 |

|                         |           |           |           |                         |           |           |           |
|-------------------------|-----------|-----------|-----------|-------------------------|-----------|-----------|-----------|
| 6                       | 1.435237  | -2.454615 | 2.521506  | 6                       | -1.220642 | -0.699671 | -0.373081 |
| 7                       | 2.027493  | 3.470904  | 2.472726  | 6                       | 1.220642  | -0.699671 | -0.373081 |
| 7                       | 2.027493  | -3.470904 | 2.472726  | 1                       | 2.162967  | 1.239811  | -0.409336 |
| 6                       | -0.698120 | 1.219018  | 2.574286  | 1                       | -2.162967 | 1.239811  | -0.409336 |
| 6                       | -0.698120 | -1.219018 | 2.574286  | 1                       | -2.162967 | -1.239811 | -0.409336 |
| 1                       | -1.237438 | 2.160744  | 2.627423  | 1                       | 2.162967  | -1.239811 | -0.409336 |
| 1                       | -1.237438 | -2.160744 | 2.627423  |                         |           |           |           |
| <b>CN3</b>              |           |           |           |                         |           |           |           |
| 11                      | 0.000000  | 0.000000  | 2.657924  |                         |           |           |           |
| 6                       | 1.412555  | 0.000000  | 0.000000  |                         |           |           |           |
| 6                       | -0.706277 | -1.223308 | 0.000000  |                         |           |           |           |
| 6                       | -0.706277 | 1.223308  | 0.000000  |                         |           |           |           |
| 6                       | 0.701330  | -1.214742 | -0.017235 |                         |           |           |           |
| 6                       | -1.402663 | 0.000001  | -0.017235 |                         |           |           |           |
| 6                       | 0.701332  | 1.214741  | -0.017235 |                         |           |           |           |
| 1                       | 2.498903  | -0.000002 | -0.036450 |                         |           |           |           |
| 1                       | -1.249453 | -2.164112 | -0.036450 |                         |           |           |           |
| 1                       | -1.249450 | 2.164114  | -0.036450 |                         |           |           |           |
| 6                       | 1.418390  | -2.456973 | -0.017017 |                         |           |           |           |
| 6                       | -2.836996 | 0.000125  | -0.017017 |                         |           |           |           |
| 6                       | 1.418606  | 2.456848  | -0.017017 |                         |           |           |           |
| 7                       | 2.006652  | -3.476305 | 0.020809  |                         |           |           |           |
| 7                       | -4.013895 | 0.000341  | 0.020809  |                         |           |           |           |
| 7                       | 2.007243  | 3.475964  | 0.020809  |                         |           |           |           |
| <b>NO<sub>2</sub>1</b>  |           |           |           |                         |           |           |           |
| 11                      | -2.118432 | -0.974539 | 0.000000  |                         |           |           |           |
| 6                       | 0.348137  | 0.416334  | 0.000000  |                         |           |           |           |
| 6                       | 0.364799  | -2.362782 | 0.000000  |                         |           |           |           |
| 7                       | 0.364716  | 1.904699  | 0.000000  |                         |           |           |           |
| 1                       | 0.406420  | -3.448247 | 0.000000  |                         |           |           |           |
| 6                       | 0.359992  | -0.256422 | 1.225967  |                         |           |           |           |
| 6                       | 0.359992  | -0.256422 | -1.225967 |                         |           |           |           |
| 1                       | 0.396854  | 0.309637  | 2.151256  |                         |           |           |           |
| 1                       | 0.396854  | 0.309637  | -2.151256 |                         |           |           |           |
| 6                       | 0.365096  | -1.659584 | -1.216040 |                         |           |           |           |
| 6                       | 0.365096  | -1.659584 | 1.216040  |                         |           |           |           |
| 1                       | 0.405541  | -2.200029 | -2.157512 |                         |           |           |           |
| 1                       | 0.405541  | -2.200029 | 2.157512  |                         |           |           |           |
| 8                       | 0.359992  | 2.455426  | 1.096476  |                         |           |           |           |
| 8                       | 0.359992  | 2.455426  | -1.096476 |                         |           |           |           |
| <b>NO<sub>2</sub>2m</b> |           |           |           | <b>NO<sub>2</sub>2p</b> |           |           |           |
| 11                      | 1.269671  | 2.050508  | 0.000000  | 11                      | 0.000000  | 0.000000  | 2.265104  |
| 6                       | -0.713871 | -0.123410 | 0.000000  | 6                       | 0.000661  | 1.366551  | -0.333717 |

|                         |           |           |           |                         |           |           |           |
|-------------------------|-----------|-----------|-----------|-------------------------|-----------|-----------|-----------|
| 6                       | 2.018984  | -0.788562 | 0.000000  | 6                       | -0.000661 | -1.366551 | -0.333717 |
| 1                       | -1.777122 | 0.094407  | 0.000000  | 6                       | 1.229108  | 0.700282  | -0.370243 |
| 1                       | 3.063345  | -1.087989 | 0.000000  | 6                       | -1.229108 | -0.700282 | -0.370243 |
| 6                       | 1.349711  | -0.623042 | 1.223208  | 6                       | 1.228660  | -0.699109 | -0.337117 |
| 6                       | 1.349711  | -0.623042 | -1.223208 | 6                       | -1.228660 | 0.699109  | -0.337117 |
| 1                       | 1.859383  | -0.786506 | 2.167472  | 7                       | 0.000000  | 2.837029  | -0.265163 |
| 1                       | 1.859383  | -0.786506 | -2.167472 | 7                       | 0.000000  | -2.837029 | -0.265163 |
| 6                       | -0.003010 | -0.278947 | -1.192411 | 1                       | 2.153607  | 1.267656  | -0.430947 |
| 6                       | -0.003010 | -0.278947 | 1.192411  | 1                       | -2.153607 | -1.267656 | -0.430947 |
| 7                       | -0.746225 | -0.126757 | -2.476118 | 1                       | 2.154684  | -1.266578 | -0.339369 |
| 7                       | -0.746225 | -0.126757 | 2.476118  | 1                       | -2.154684 | 1.266578  | -0.339369 |
| 8                       | -0.096233 | -0.276754 | -3.505011 | 8                       | 0.833416  | 3.428424  | -0.942724 |
| 8                       | -1.935973 | 0.156835  | -2.388471 | 8                       | -0.833416 | -3.428424 | -0.942724 |
| 8                       | -1.935973 | 0.156835  | 2.388471  | 8                       | -0.833219 | 3.333990  | 0.494580  |
| 8                       | -0.096233 | -0.276754 | 3.505011  | 8                       | 0.833219  | -3.333990 | 0.494580  |
| <b>CH<sub>3</sub>1</b>  |           |           |           | <b>CH<sub>3</sub>2o</b> |           |           |           |
| 11                      | 0.000000  | 0.000000  | 2.494346  | 11                      | -1.113980 | -0.004790 | 1.819461  |
| 6                       | 1.401424  | 0.000000  | 0.073974  | 6                       | -0.525611 | -1.391164 | -0.476104 |
| 6                       | 0.676747  | -1.208886 | 0.097202  | 6                       | -0.525117 | 1.393858  | -0.468129 |
| 6                       | 0.676747  | 1.208886  | 0.097202  | 6                       | -1.716613 | -0.698870 | -0.748497 |
| 6                       | -0.727324 | -1.212638 | 0.125721  | 6                       | -1.716485 | 0.703637  | -0.744042 |
| 6                       | -0.727324 | 1.212638  | 0.125721  | 6                       | 0.677380  | -0.709321 | -0.206583 |
| 6                       | -1.435252 | 0.000000  | 0.138565  | 6                       | 0.677427  | 0.709967  | -0.201706 |
| 6                       | 2.900618  | 0.000000  | -0.073812 | 1                       | -0.518185 | -2.478226 | -0.514193 |
| 1                       | 3.164090  | 0.000000  | -1.136124 | 1                       | -0.517362 | 2.481183  | -0.498726 |
| 1                       | 3.348137  | -0.888315 | 0.377856  | 1                       | -2.620811 | -1.248128 | -0.995546 |
| 1                       | 3.348137  | 0.888315  | 0.377856  | 1                       | -2.620500 | 1.254650  | -0.987858 |
| 1                       | 1.214786  | -2.153148 | 0.051567  | 6                       | 1.958854  | -1.476936 | -0.010412 |
| 1                       | 1.214786  | 2.153148  | 0.051567  | 6                       | 1.960250  | 1.476273  | -0.010907 |
| 1                       | -1.265017 | -2.156642 | 0.104825  | 1                       | 1.778906  | -2.553281 | -0.035571 |
| 1                       | -1.265017 | 2.156642  | 0.104825  | 1                       | 2.668801  | -1.232268 | -0.806630 |
| 1                       | -2.521299 | 0.000000  | 0.123987  | 1                       | 2.445282  | -1.229967 | 0.938381  |
|                         |           |           |           | 1                       | 2.626536  | 1.309046  | -0.863486 |
|                         |           |           |           | 1                       | 1.770318  | 2.548759  | 0.062902  |
|                         |           |           |           | 1                       | 2.500285  | 1.156260  | 0.884941  |
| <b>CH<sub>3</sub>2m</b> |           |           |           | <b>CH<sub>3</sub>2p</b> |           |           |           |
| 11                      | 0.000000  | 0.000000  | 2.585062  | 11                      | 0.000000  | 0.000000  | 2.373099  |
| 6                       | 1.418318  | 0.000000  | 0.222560  | 6                       | 1.432480  | 0.000000  | 0.000000  |
| 6                       | 0.696145  | -1.209828 | 0.224884  | 6                       | -1.432480 | 0.000000  | 0.000000  |
| 6                       | 0.696145  | 1.209828  | 0.224884  | 6                       | 0.702116  | -1.204919 | 0.008614  |
| 6                       | -0.709811 | -1.222240 | 0.209062  | 6                       | -0.702116 | 1.204919  | 0.008614  |
| 6                       | -0.709811 | 1.222240  | 0.209062  | 6                       | 0.702116  | 1.204919  | 0.008614  |
| 6                       | -1.405800 | 0.000000  | 0.206150  | 6                       | -0.702116 | -1.204919 | 0.008614  |



|                       |           |           |           |                       |           |           |           |
|-----------------------|-----------|-----------|-----------|-----------------------|-----------|-----------|-----------|
| 6                     | 2.921041  | 0.000000  | 0.122497  | 6                     | 2.934634  | 0.000000  | -0.117002 |
| 6                     | -1.466950 | 2.525973  | 0.122497  | 6                     | -2.934634 | 0.000000  | -0.117002 |
| 1                     | 3.202313  | 0.000000  | -0.935322 | 1                     | 3.221383  | 0.000000  | -1.173223 |
| 1                     | 3.361969  | -0.888243 | 0.581052  | 1                     | -3.221383 | 0.000000  | -1.173223 |
| 1                     | 3.361969  | 0.888243  | 0.581052  | 1                     | 3.372726  | -0.888102 | 0.344442  |
| 1                     | -1.631845 | 2.807489  | -0.922324 | 1                     | -3.372726 | 0.888102  | 0.344442  |
| 1                     | -2.445898 | 2.445565  | 0.600890  | 1                     | 3.372726  | 0.888102  | 0.344442  |
| 1                     | -0.908496 | 3.335672  | 0.598085  | 1                     | -3.372726 | -0.888102 | 0.344442  |
| 1                     | 1.239149  | -2.152761 | 0.197536  | 1                     | 1.235565  | -2.152817 | -0.020415 |
| 1                     | 1.239149  | 2.152761  | 0.197536  | 1                     | -1.235565 | 2.152817  | -0.020415 |
| 1                     | -1.249733 | -2.164344 | 0.176854  | 1                     | 1.235565  | 2.152817  | -0.020415 |
| 1                     | -2.492627 | 0.000000  | 0.165979  | 1                     | -1.235565 | -2.152817 | -0.020415 |
|                       |           |           |           |                       |           |           |           |
| <b>CH<sub>3</sub></b> |           |           |           | <b>CH<sub>3</sub></b> |           |           |           |
| 11                    | 0.000000  | 0.000000  | 2.062645  | 11                    | 0.000000  | 0.000000  | 2.085819  |
| 6                     | 0.000000  | 1.419945  | -0.295600 | 6                     | 0.000000  | 1.380525  | -0.248358 |
| 6                     | 1.229708  | -0.709972 | -0.295600 | 6                     | 0.000000  | -1.380525 | -0.248358 |
| 6                     | -1.229708 | -0.709972 | -0.295600 | 6                     | 1.237317  | 0.708063  | -0.256170 |
| 6                     | 0.000000  | -1.396255 | -0.289274 | 6                     | -1.237317 | -0.708063 | -0.256170 |
| 6                     | 1.209193  | 0.698128  | -0.289274 | 6                     | 1.237301  | -0.708000 | -0.255989 |
| 6                     | -1.209193 | 0.698128  | -0.289274 | 6                     | -1.237301 | 0.708000  | -0.255989 |
| 6                     | 0.000000  | 2.923833  | -0.400905 | 1                     | -0.000067 | 2.469299  | -0.281215 |
| 6                     | 2.532113  | -1.461916 | -0.400905 | 1                     | 0.000067  | -2.469299 | -0.281215 |
| 6                     | -2.532113 | -1.461916 | -0.400905 | 6                     | 2.526724  | 1.482143  | -0.354032 |
| 1                     | 0.000000  | -2.484896 | -0.321102 | 6                     | -2.526724 | -1.482143 | -0.354032 |
| 1                     | 2.151983  | 1.242448  | -0.321102 | 6                     | 2.526226  | -1.482182 | -0.358023 |
| 1                     | -2.151983 | 1.242448  | -0.321102 | 6                     | -2.526226 | 1.482182  | -0.358023 |
| 1                     | 0.000000  | 3.219394  | -1.454819 | 1                     | 3.231389  | 1.211459  | 0.438462  |
| 1                     | 2.788077  | -1.609697 | -1.454819 | 1                     | -3.231389 | -1.211459 | 0.438462  |
| 1                     | -2.788077 | -1.609697 | -1.454819 | 1                     | 2.344143  | 2.557266  | -0.300353 |
| 1                     | 0.888223  | 3.358614  | 0.063782  | 1                     | -2.344143 | -2.557266 | -0.300353 |
| 1                     | 2.464533  | -2.448531 | 0.063782  | 1                     | 3.021506  | 1.269866  | -1.307223 |
| 1                     | -3.352757 | -0.910083 | 0.063782  | 1                     | -3.021506 | -1.269866 | -1.307223 |
| 1                     | -0.888223 | 3.358614  | 0.063782  | 1                     | 3.000357  | -1.296617 | -1.327319 |
| 1                     | 3.352757  | -0.910083 | 0.063782  | 1                     | -3.000357 | 1.296617  | -1.327319 |
| 1                     | -2.464533 | -2.448531 | 0.063782  | 1                     | 3.246160  | -1.186864 | 0.411329  |
|                       |           |           |           | 1                     | -3.246166 | 1.186864  | 0.411329  |
|                       |           |           |           | 1                     | 2.347764  | -2.555792 | -0.270256 |
|                       |           |           |           | 1                     | -2.347764 | 2.555792  | -0.270256 |
|                       |           |           |           |                       |           |           |           |
| <b>OH1</b>            |           |           |           | <b>OH2o</b>           |           |           |           |
| 11                    | -0.738912 | -0.077211 | 1.877006  | 11                    | 1.167927  | -0.126414 | 1.811499  |
| 6                     | 1.100036  | -0.047553 | -0.246398 | 6                     | -0.709515 | -0.717101 | -0.252527 |
| 6                     | -1.669358 | 0.092430  | -0.736998 | 6                     | -0.755434 | 0.694482  | -0.173686 |
| 8                     | 2.429774  | -0.115494 | 0.003685  | 6                     | 0.398670  | 1.452079  | -0.404943 |
| 6                     | 0.350314  | -1.227047 | -0.410201 | 6                     | 0.502118  | -1.350781 | -0.560062 |

|             |           |           |           |             |           |           |           |
|-------------|-----------|-----------|-----------|-------------|-----------|-----------|-----------|
| 6           | 0.451491  | 1.200534  | -0.288671 | 6           | 1.606136  | 0.811192  | -0.735732 |
| 6           | -0.924315 | 1.268002  | -0.552417 | 6           | 1.655102  | -0.588616 | -0.812271 |
| 6           | -1.025236 | -1.153451 | -0.673640 | 8           | -1.979839 | 1.202363  | 0.143734  |
| 1           | 0.850245  | -2.190526 | -0.391500 | 8           | -1.808046 | -1.462615 | -0.026339 |
| 1           | 1.029588  | 2.112510  | -0.176082 | 1           | -2.060224 | 2.115678  | -0.155796 |
| 1           | -1.413088 | 2.237443  | -0.638049 | 1           | -2.575923 | -0.874346 | 0.019274  |
| 1           | -1.592431 | -2.065593 | -0.853468 | 1           | 0.344949  | 2.537969  | -0.367262 |
| 1           | -2.724474 | 0.148411  | -0.976813 | 1           | 0.506308  | -2.432868 | -0.657728 |
| 1           | 2.842410  | 0.733548  | -0.190686 | 1           | 2.484402  | 1.406800  | -0.964447 |
|             |           |           |           | 1           | 2.573903  | -1.088202 | -1.104371 |
| <b>OH2m</b> |           |           |           | <b>OH2p</b> |           |           |           |
| 11          | 2.044606  | 0.458758  | 0.000000  | 11          | 0.000000  | 0.000000  | 2.037703  |
| 6           | -0.352645 | -1.092029 | 0.000000  | 6           | -1.223411 | -0.706152 | -0.383910 |
| 6           | -0.363771 | 1.703130  | 0.000000  | 6           | 1.223411  | 0.706152  | -0.383910 |
| 1           | -0.373114 | -2.180861 | 0.000000  | 6           | -1.213885 | 0.697979  | -0.375735 |
| 1           | -0.396845 | 2.789146  | 0.000000  | 6           | 1.213885  | -0.697979 | -0.375735 |
| 6           | -0.362016 | 1.016717  | 1.222107  | 6           | 0.000000  | 1.400244  | -0.361447 |
| 6           | -0.362016 | 1.016717  | -1.222107 | 6           | 0.000000  | -1.400244 | -0.361447 |
| 1           | -0.416954 | 1.541258  | 2.170637  | 8           | -2.437565 | -1.317024 | -0.372489 |
| 1           | -0.416954 | 1.541258  | -2.170637 | 8           | 2.437565  | 1.317024  | -0.372489 |
| 6           | -0.390103 | -0.387721 | -1.217055 | 1           | -2.160704 | 1.228761  | -0.417407 |
| 6           | -0.390103 | -0.387721 | 1.217055  | 1           | 2.160704  | -1.228761 | -0.417407 |
| 8           | -0.390103 | -1.006115 | -2.422504 | 1           | -0.011673 | 2.487806  | -0.386350 |
| 8           | -0.390103 | -1.006115 | 2.422504  | 1           | 0.011673  | -2.487806 | -0.386350 |
| 1           | -0.660613 | -1.926935 | -2.328056 | 1           | -2.356433 | -2.221222 | -0.697139 |
| 1           | -0.660613 | -1.926935 | 2.328056  | 1           | 2.356433  | 2.221222  | -0.697139 |
| <b>OH3</b>  |           |           |           | <b>OH4</b>  |           |           |           |
| 11          | 0.000000  | 0.000000  | 2.090629  | 11          | 0.000000  | 0.000000  | 2.126932  |
| 6           | 0.000000  | 1.409990  | -0.304719 | 6           | 0.000000  | 1.401950  | -0.280488 |
| 6           | 1.221087  | -0.704995 | -0.304719 | 6           | 0.000000  | -1.401950 | -0.280488 |
| 6           | -1.221087 | -0.704995 | -0.304719 | 6           | 1.212541  | 0.699784  | -0.300880 |
| 6           | 1.207506  | 0.701248  | -0.343773 | 6           | -1.212541 | -0.699784 | -0.300880 |
| 6           | 0.003546  | -1.396355 | -0.343773 | 6           | 1.219635  | -0.709359 | -0.307160 |
| 6           | -1.211052 | 0.695107  | -0.343773 | 6           | -1.219635 | 0.709359  | -0.307160 |
| 1           | -2.146716 | -1.271090 | -0.361819 | 1           | -0.017767 | 2.488919  | -0.310346 |
| 1           | -0.027438 | 2.494655  | -0.361819 | 1           | 0.017767  | -2.488919 | -0.310346 |
| 1           | 2.174154  | -1.223565 | -0.361819 | 8           | 2.449681  | 1.284657  | -0.291339 |
| 8           | 2.418358  | 1.307760  | -0.353876 | 8           | -2.449681 | -1.284657 | -0.291339 |
| 8           | -0.076625 | -2.748239 | -0.353876 | 8           | 2.373734  | -1.414116 | -0.314571 |
| 8           | -2.341733 | 1.440479  | -0.353876 | 8           | -2.373734 | 1.414116  | -0.314571 |
| 1           | 2.319062  | 2.239947  | -0.581865 | 1           | 2.418823  | 2.145826  | -0.724315 |
| 1           | 0.780320  | -3.128340 | -0.581865 | 1           | -2.418823 | -2.145826 | -0.724315 |
| 1           | -3.099382 | 0.888393  | -0.581865 | 1           | 3.101769  | -0.799164 | -0.485017 |
|             |           |           |           | 1           | -3.101769 | 0.799164  | -0.485017 |

| <b>NH<sub>2</sub>1</b>  |           |           |           | <b>NH<sub>2</sub>o</b>  |           |           |           |
|-------------------------|-----------|-----------|-----------|-------------------------|-----------|-----------|-----------|
| 11                      | 0.000000  | 0.000000  | 0.000000  | 11                      | 1.184991  | -0.000508 | 1.784144  |
| 6                       | 1.421630  | 0.000000  | 2.397888  | 6                       | -0.724406 | -0.710441 | -0.192850 |
| 6                       | -1.409989 | 0.000000  | 2.389709  | 6                       | -0.722240 | 0.714018  | -0.218777 |
| 7                       | 2.819124  | 0.000000  | 2.335068  | 6                       | 0.484428  | 1.394781  | -0.454514 |
| 1                       | -2.494638 | 0.000000  | 2.430218  | 6                       | 0.467022  | -1.398802 | -0.487249 |
| 6                       | 0.701371  | 1.214809  | 2.378510  | 6                       | 1.667108  | 0.695194  | -0.751031 |
| 6                       | 0.701371  | -1.214809 | 2.378510  | 6                       | 1.656012  | -0.706697 | -0.773471 |
| 1                       | 1.245167  | 2.156693  | 2.393500  | 7                       | -1.914135 | 1.372891  | 0.077911  |
| 1                       | 1.245167  | -2.156693 | 2.393500  | 7                       | -1.938184 | -1.358991 | -0.013849 |
| 6                       | -0.699451 | -1.211484 | 2.390454  | 1                       | -1.894252 | 2.369150  | -0.104230 |
| 6                       | -0.699451 | 1.211484  | 2.390454  | 1                       | -2.725053 | 0.951244  | -0.364684 |
| 1                       | -1.242579 | -2.152211 | 2.414742  | 1                       | -2.563036 | -0.952188 | 0.671237  |
| 1                       | -1.242579 | 2.152211  | 2.414742  | 1                       | -1.901963 | -2.367742 | 0.042481  |
| 1                       | 3.221728  | 0.809270  | 2.798875  | 1                       | 0.475473  | 2.482066  | -0.491304 |
| 1                       | 3.221728  | -0.809270 | 2.798875  | 1                       | 0.452129  | -2.486243 | -0.519593 |
|                         |           |           |           | 1                       | 2.570552  | 1.244795  | -0.997734 |
|                         |           |           |           | 1                       | 2.549932  | -1.261118 | -1.042844 |
| <b>NH<sub>2</sub>2m</b> |           |           |           | <b>NH<sub>2</sub>2p</b> |           |           |           |
| 11                      | -2.019880 | 0.157837  | 0.000000  | 11                      | 0.000000  | 0.000000  | 1.993927  |
| 6                       | 0.447447  | -1.017711 | 0.000000  | 6                       | 0.000000  | 1.427385  | -0.383543 |
| 6                       | 0.210401  | 1.762741  | 0.000000  | 6                       | 0.000000  | -1.427385 | -0.383543 |
| 1                       | 0.573093  | -2.099146 | 0.000000  | 7                       | 0.000000  | 2.820526  | -0.297928 |
| 1                       | 0.139019  | 2.847096  | 0.000000  | 7                       | 0.000000  | -2.820526 | -0.297928 |
| 6                       | 0.260365  | 1.077958  | 1.219954  | 6                       | 1.209223  | 0.699808  | -0.371639 |
| 6                       | 0.260365  | 1.077958  | -1.219954 | 6                       | -1.209223 | 0.699808  | -0.371639 |
| 1                       | 0.248305  | 1.620473  | 2.161218  | 6                       | -1.209223 | -0.699808 | -0.371639 |
| 1                       | 0.248305  | 1.620473  | -2.161218 | 6                       | 1.209223  | -0.699808 | -0.371639 |
| 6                       | 0.416304  | -0.326177 | -1.226795 | 1                       | 2.150482  | 1.244538  | -0.397479 |
| 6                       | 0.416304  | -0.326177 | 1.226795  | 1                       | -2.150482 | 1.244538  | -0.397479 |
| 7                       | 0.416304  | -1.024571 | -2.426353 | 1                       | -2.150482 | -1.244538 | -0.397479 |
| 7                       | 0.416304  | -1.024571 | 2.426353  | 1                       | 2.150482  | -1.244538 | -0.397479 |
| 1                       | 0.710490  | -0.497007 | -3.237544 | 1                       | 0.832296  | 3.266107  | -0.662606 |
| 1                       | 0.846799  | -1.939317 | -2.397818 | 1                       | -0.832296 | 3.266107  | -0.662606 |
| 1                       | 0.846799  | -1.939317 | 2.397818  | 1                       | -0.832296 | -3.266107 | -0.662606 |
| 1                       | 0.710490  | -0.497007 | 3.237544  | 1                       | 0.832296  | -3.266107 | -0.662606 |
| <b>NH<sub>2</sub>3</b>  |           |           |           | <b>NH<sub>2</sub>4</b>  |           |           |           |
| 11                      | 0.000000  | 0.000000  | 2.028876  | 11                      | 0.000000  | 0.000000  | 2.324285  |
| 6                       | 0.000000  | 1.408860  | -0.341694 | 6                       | 1.389498  | 0.000000  | 0.000000  |
| 6                       | 1.220109  | -0.704430 | -0.341694 | 6                       | -1.389498 | 0.000000  | 0.000000  |
| 6                       | -1.220109 | -0.704430 | -0.341694 | 6                       | 0.707114  | -1.228846 | -0.045356 |
| 6                       | 1.217436  | 0.702887  | -0.305174 | 6                       | -0.707114 | 1.228846  | -0.045356 |
| 6                       | -1.217436 | 0.702887  | -0.305174 | 6                       | -0.708743 | -1.232405 | -0.006251 |

|                          |           |           |           |                          |           |           |           |
|--------------------------|-----------|-----------|-----------|--------------------------|-----------|-----------|-----------|
| 6                        | 0.000000  | -1.405774 | -0.305174 | 6                        | 0.708743  | 1.232405  | -0.006251 |
| 7                        | 0.000000  | 2.796773  | -0.280392 | 1                        | 2.478180  | -0.000859 | -0.036137 |
| 7                        | 2.422076  | -1.398386 | -0.280392 | 1                        | -2.478180 | 0.000859  | -0.036137 |
| 7                        | -2.422076 | -1.398386 | -0.280392 | 7                        | 1.371217  | -2.464870 | -0.031579 |
| 1                        | 2.158706  | 1.246330  | -0.340018 | 7                        | -1.371217 | 2.464870  | -0.031579 |
| 1                        | -2.158706 | 1.246330  | -0.340018 | 7                        | -1.372058 | -2.458388 | -0.117097 |
| 1                        | 0.000000  | -2.492660 | -0.340018 | 7                        | 1.372058  | 2.458388  | -0.117097 |
| 1                        | 0.836999  | 3.245686  | -0.627623 | 1                        | 2.362498  | -2.393941 | -0.229363 |
| 1                        | -0.836999 | 3.245686  | -0.627623 | 1                        | -2.362498 | 2.393941  | -0.229363 |
| 1                        | 2.392347  | -2.347706 | -0.627623 | 1                        | -0.987433 | -3.207195 | 0.447142  |
| 1                        | 3.229346  | -0.897980 | -0.627623 | 1                        | 0.987433  | 3.207195  | 0.447142  |
| 1                        | -3.229346 | -0.897980 | -0.627623 | 1                        | 0.946310  | -3.134384 | -0.667423 |
| 1                        | -2.392347 | -2.347706 | -0.627623 | 1                        | -0.946310 | 3.134384  | -0.667423 |
|                          |           |           |           | 1                        | -2.380102 | -2.415599 | -0.047446 |
|                          |           |           |           | 1                        | 2.380102  | 2.415599  | -0.047446 |
| <b>OCH<sub>3</sub>1</b>  |           |           |           | <b>OCH<sub>3</sub>2o</b> |           |           |           |
| 11                       | -1.162530 | -0.247248 | 1.843979  | 11                       | 0.000000  | 0.000000  | 0.000000  |
| 6                        | 0.674101  | -0.242890 | -0.243119 | 0                        | 0.000000  | 0.000000  | 1.845904  |
| 6                        | -2.031990 | 0.431433  | -0.708009 | 6                        | 1.551821  | 0.000000  | 2.382394  |
| 6                        | -0.271076 | -1.245653 | -0.554441 | 6                        | 0.891388  | 1.270266  | 2.382394  |
| 6                        | -1.607113 | -0.907911 | -0.791250 | 6                        | -0.511834 | 1.314846  | 2.363783  |
| 6                        | -1.097043 | 1.423003  | -0.385140 | 6                        | 0.782282  | -1.174235 | 2.363783  |
| 6                        | 0.250121  | 1.097841  | -0.139853 | 6                        | -0.627752 | -1.112762 | 2.376541  |
| 8                        | 1.937845  | -0.668338 | -0.059463 | 6                        | -1.271458 | 0.125331  | 2.376541  |
| 1                        | -3.060421 | 0.697471  | -0.930805 | 8                        | 2.891098  | 0.053151  | 2.413509  |
| 1                        | 0.080404  | -2.268323 | -0.659258 | 8                        | 1.704194  | 2.336020  | 2.413509  |
| 1                        | -2.309653 | -1.686341 | -1.075910 | 1                        | -1.023530 | 2.270193  | 2.401648  |
| 1                        | -1.401234 | 2.465435  | -0.346997 | 1                        | 1.270371  | -2.141856 | 2.401648  |
| 1                        | 0.957134  | 1.892413  | 0.071259  | 1                        | -1.201405 | -2.033541 | 2.422984  |
| 6                        | 2.967135  | 0.326878  | 0.002057  | 1                        | -2.354689 | 0.184666  | 2.422984  |
| 1                        | 2.871468  | 0.937124  | 0.905124  | 6                        | 3.589489  | -1.177583 | 2.632691  |
| 1                        | 3.901981  | -0.227381 | 0.035747  | 6                        | 1.097924  | 3.614650  | 2.632691  |
| 1                        | 2.940583  | 0.959820  | -0.888694 | 1                        | 4.637589  | -0.900575 | 2.717227  |
|                          |           |           |           | 1                        | 3.456478  | -1.855995 | 1.784970  |
|                          |           |           |           | 1                        | 3.253205  | -1.655712 | 3.557285  |
|                          |           |           |           | 1                        | 1.926716  | 4.313471  | 2.717227  |
|                          |           |           |           | 1                        | 0.513379  | 3.614024  | 3.557285  |
|                          |           |           |           | 1                        | 0.466196  | 3.895461  | 1.784970  |
| <b>OCH<sub>3</sub>2m</b> |           |           |           | <b>OCH<sub>3</sub>2p</b> |           |           |           |
| 6                        | -1.068698 | -0.383186 | -0.119534 | 11                       | 0.000000  | 0.000000  | 2.390226  |
| 6                        | 0.273854  | -0.790595 | 0.059835  | 6                        | 1.420703  | 0.000000  | 0.000000  |
| 6                        | 1.324651  | 0.068438  | -0.293931 | 6                        | -1.420703 | 0.000000  | 0.000000  |
| 6                        | 1.038123  | 1.373764  | -0.759451 | 6                        | 0.704511  | -1.215973 | 0.016427  |
| 6                        | -0.290160 | 1.770183  | -0.908112 | 6                        | -0.704511 | 1.215973  | 0.016427  |

|                        |           |           |           |                        |           |           |           |
|------------------------|-----------|-----------|-----------|------------------------|-----------|-----------|-----------|
| 6                      | -1.360190 | 0.914262  | -0.575073 | 6                      | -0.698363 | -1.207686 | 0.009461  |
| 8                      | -1.987891 | -1.316058 | 0.197349  | 6                      | 0.698363  | 1.207686  | 0.009461  |
| 1                      | 0.443681  | -1.810015 | 0.387569  | 8                      | 2.767517  | 0.108435  | -0.016245 |
| 8                      | 2.630253  | -0.249542 | -0.211732 | 8                      | -2.767517 | -0.108435 | -0.016245 |
| 1                      | 1.861653  | 2.014313  | -1.059033 | 1                      | 1.219412  | -2.169889 | -0.020003 |
| 1                      | -0.509161 | 2.755410  | -1.310900 | 1                      | -1.219412 | 2.169889  | -0.020003 |
| 1                      | -2.379257 | 1.239363  | -0.746119 | 1                      | -1.253107 | -2.141095 | -0.031072 |
| 6                      | -3.350533 | -1.039878 | -0.146524 | 1                      | 1.253107  | 2.141095  | -0.031072 |
| 6                      | 2.960553  | -1.620789 | 0.037776  | 6                      | 3.510293  | -1.071976 | -0.338155 |
| 1                      | -3.900709 | -1.942534 | 0.108479  | 6                      | -3.510293 | 1.071976  | -0.338155 |
| 1                      | -3.442349 | -0.837236 | -1.216666 | 1                      | 3.431716  | -1.818524 | 0.458270  |
| 1                      | -3.739419 | -0.197863 | 0.433964  | 1                      | -3.431716 | 1.818524  | 0.458270  |
| 1                      | 4.044568  | -1.673105 | -0.030185 | 1                      | 3.167910  | -1.494094 | -1.286946 |
| 1                      | 2.506907  | -2.267163 | -0.718013 | 1                      | -3.167910 | 1.494094  | -1.286946 |
| 1                      | 2.641396  | -1.926233 | 1.038803  | 1                      | 4.544579  | -0.748178 | -0.428568 |
| 11                     | 0.015289  | 1.401515  | 1.768841  | 1                      | -4.544579 | 0.748178  | -0.428568 |
|                        |           |           |           |                        |           |           |           |
| <b>OCH<sub>3</sub></b> |           |           |           | <b>OCH<sub>3</sub></b> |           |           |           |
| 11                     | 0.000000  | 0.000000  | 2.354837  | 11                     | -0.000015 | -0.000002 | 2.265834  |
| 6                      | 1.413720  | 0.000000  | 0.000000  | 6                      | 0.000000  | -1.393698 | -0.082638 |
| 6                      | -0.706860 | -1.224318 | 0.000000  | 6                      | 0.000000  | 1.393698  | -0.082634 |
| 6                      | -0.706860 | 1.224318  | 0.000000  | 1                      | 0.000001  | -2.475821 | -0.113471 |
| 6                      | 0.691094  | -1.218502 | -0.031999 | 1                      | 0.000000  | 2.475822  | -0.113464 |
| 6                      | -1.400801 | 0.010746  | -0.031999 | 6                      | -1.231070 | -0.707981 | -0.109061 |
| 6                      | 0.709706  | 1.207756  | -0.031999 | 6                      | 1.231072  | -0.707980 | -0.109050 |
| 1                      | -1.201265 | 2.186025  | -0.062805 | 6                      | 1.231072  | 0.707981  | -0.109048 |
| 1                      | 2.493786  | -0.052686 | -0.062805 | 6                      | -1.231070 | 0.707981  | -0.109059 |
| 1                      | -1.292520 | -2.133339 | -0.062805 | 8                      | -2.442602 | -1.304865 | -0.125830 |
| 8                      | 1.458128  | -2.326933 | -0.064601 | 8                      | 2.442605  | -1.304865 | -0.125810 |
| 8                      | -2.744247 | -0.099309 | -0.064601 | 8                      | 2.442604  | 1.304865  | -0.125806 |
| 8                      | 1.286119  | 2.426243  | -0.064601 | 8                      | -2.442602 | 1.304866  | -0.125827 |
| 6                      | 0.796328  | -3.576598 | -0.288690 | 6                      | -2.475032 | -2.696645 | -0.447001 |
| 6                      | -3.495589 | 1.098659  | -0.288690 | 6                      | 2.475037  | -2.696646 | -0.446976 |
| 6                      | 2.699261  | 2.477939  | -0.288690 | 6                      | 2.475038  | 2.696646  | -0.446973 |
| 1                      | 0.136910  | -3.827619 | 0.547660  | 6                      | -2.475032 | 2.696647  | -0.446995 |
| 1                      | -3.383271 | 1.795242  | 0.547660  | 1                      | -2.025437 | -3.300370 | 0.348510  |
| 1                      | 3.246360  | 2.032378  | 0.547660  | 1                      | -3.529848 | -2.947762 | -0.535175 |
| 1                      | 0.228251  | -3.547575 | -1.222024 | 1                      | -1.966510 | -2.885588 | -1.396996 |
| 1                      | -3.186416 | 1.576116  | -1.222024 | 1                      | 2.025437  | -3.300367 | 0.348535  |
| 1                      | 2.958164  | 1.971459  | -1.222024 | 1                      | 1.966521  | -2.885593 | -1.396973 |
| 1                      | 1.591364  | -4.315193 | -0.360073 | 1                      | 3.529853  | -2.947762 | -0.535142 |
| 1                      | -4.532749 | 0.779435  | -0.360073 | 1                      | 2.025436  | 3.300367  | 0.348537  |
| 1                      | 2.941385  | 3.535758  | -0.360073 | 1                      | 3.529854  | 2.947763  | -0.535137 |
|                        |           |           |           | 1                      | 1.966523  | 2.885591  | -1.396971 |
|                        |           |           |           | 1                      | -2.025437 | 3.300368  | 0.348518  |
|                        |           |           |           | 1                      | -1.966509 | 2.885590  | -1.396989 |

|                                        |           |           |           |                                        |           |           |           |
|----------------------------------------|-----------|-----------|-----------|----------------------------------------|-----------|-----------|-----------|
|                                        | 1         | -3.529848 | 2.947763  | -0.535169                              |           |           |           |
| <b>N(CH<sub>3</sub>)<sub>2</sub>1</b>  |           |           |           | <b>N(CH<sub>3</sub>)<sub>2</sub>2o</b> |           |           |           |
| 6                                      | 0.202417  | 0.422496  | 0.000000  | 11                                     | 1.827161  | -0.363831 | 1.770356  |
| 6                                      | 0.282200  | -0.319262 | 1.213746  | 6                                      | 0.763891  | -1.733212 | -0.343748 |
| 6                                      | 0.467575  | -1.708123 | 1.204947  | 6                                      | 1.575533  | 0.907905  | -0.622809 |
| 6                                      | 0.552377  | -2.423131 | 0.000000  | 6                                      | -0.211595 | -0.719425 | -0.192326 |
| 6                                      | 0.467575  | -1.708123 | -1.204947 | 6                                      | 0.224715  | 0.657954  | -0.279469 |
| 6                                      | 0.282200  | -0.319262 | -1.213746 | 6                                      | 2.101054  | -1.452164 | -0.671906 |
| 7                                      | 0.019663  | 1.785023  | 0.000000  | 6                                      | 2.504226  | -0.123921 | -0.837685 |
| 1                                      | 0.265562  | 0.191778  | 2.169020  | 7                                      | -1.549493 | -1.034358 | 0.052901  |
| 1                                      | 0.572239  | -2.226898 | 2.154312  | 7                                      | -0.674416 | 1.709157  | -0.092521 |
| 1                                      | 0.736286  | -3.492650 | 0.000000  | 1                                      | 0.452456  | -2.770691 | -0.299392 |
| 1                                      | 0.572239  | -2.226898 | -2.154312 | 1                                      | 1.907043  | 1.933994  | -0.736784 |
| 1                                      | 0.265562  | 0.191778  | -2.169020 | 1                                      | 2.793038  | -2.271047 | -0.847006 |
| 6                                      | 0.282200  | 2.513637  | 1.239202  | 1                                      | 3.519456  | 0.117253  | -1.139118 |
| 6                                      | 0.282200  | 2.513637  | -1.239202 | 6                                      | -1.852435 | -2.423848 | 0.373987  |
| 1                                      | 1.319857  | 2.392845  | 1.577681  | 6                                      | -2.509731 | -0.500082 | -0.927373 |
| 1                                      | 0.089116  | 3.571277  | 1.064301  | 6                                      | -1.357685 | 1.732881  | 1.201190  |
| 1                                      | -0.392113 | 2.183297  | 2.032484  | 6                                      | -0.242502 | 3.037989  | -0.503742 |
| 1                                      | 1.319857  | 2.392845  | -1.577681 | 1                                      | -1.225743 | -2.769624 | 1.200074  |
| 1                                      | -0.392113 | 2.183297  | -2.032484 | 1                                      | -1.723071 | -3.101039 | -0.484217 |
| 1                                      | 0.089116  | 3.571277  | -1.064301 | 1                                      | -2.895473 | -2.474159 | 0.692052  |
| 11                                     | -1.954155 | -1.368940 | 0.000000  | 1                                      | -3.518060 | -0.617487 | -0.524528 |
|                                        |           |           |           | 1                                      | -2.439458 | -1.052766 | -1.874716 |
|                                        |           |           |           | 1                                      | -2.317217 | 0.555213  | -1.113108 |
|                                        |           |           |           | 1                                      | -0.669194 | 2.054727  | 2.002958  |
|                                        |           |           |           | 1                                      | -1.762454 | 0.747785  | 1.435503  |
|                                        |           |           |           | 1                                      | -2.179341 | 2.451280  | 1.159418  |
|                                        |           |           |           | 1                                      | -1.109821 | 3.699942  | -0.467252 |
|                                        |           |           |           | 1                                      | 0.536165  | 3.459745  | 0.153167  |
|                                        |           |           |           | 1                                      | 0.127446  | 3.010958  | -1.530342 |
| <b>N(CH<sub>3</sub>)<sub>2</sub>2m</b> |           |           |           | <b>N(CH<sub>3</sub>)<sub>2</sub>2p</b> |           |           |           |
| 11                                     | 1.395233  | 1.905678  | 0.000000  | 11                                     | 0.000000  | 0.000000  | 2.088614  |
| 6                                      | -0.607130 | 0.069031  | 0.000000  | 6                                      | 0.000000  | 1.455976  | -0.298939 |
| 6                                      | 2.076077  | -0.710982 | 0.000000  | 6                                      | 0.000000  | -1.455976 | -0.298939 |
| 1                                      | -1.659915 | 0.308124  | 0.000000  | 6                                      | 1.202119  | 0.701421  | -0.232060 |
| 1                                      | 3.110722  | -1.044916 | 0.000000  | 6                                      | -1.202119 | -0.701421 | -0.232060 |
| 6                                      | 1.426469  | -0.510626 | 1.221118  | 6                                      | 1.202119  | -0.701421 | -0.232060 |
| 6                                      | 1.426469  | -0.510626 | -1.221118 | 6                                      | -1.202119 | 0.701421  | -0.232060 |
| 1                                      | 1.936831  | -0.711968 | 2.153349  | 7                                      | 0.000000  | 2.825644  | -0.463002 |
| 1                                      | 1.936831  | -0.711968 | -2.153349 | 7                                      | 0.000000  | -2.825644 | -0.463002 |
| 6                                      | 0.050313  | -0.138866 | -1.238961 | 1                                      | 2.164852  | 1.200218  | -0.235626 |
| 6                                      | 0.050313  | -0.138866 | 1.238961  | 1                                      | -2.164852 | -1.200218 | -0.235626 |
| 7                                      | -0.606735 | 0.056406  | -2.436444 | 1                                      | 2.164852  | -1.200218 | -0.235626 |

|                                       |           |           |           |   |           |           |           |
|---------------------------------------|-----------|-----------|-----------|---|-----------|-----------|-----------|
| 7                                     | -0.606735 | 0.056406  | 2.436444  | 1 | -2.164852 | 1.200218  | -0.235626 |
| 6                                     | -0.008998 | -0.505063 | -3.645229 | 6 | 1.234956  | 3.547193  | -0.197178 |
| 6                                     | -2.066544 | 0.104085  | -2.416940 | 6 | -1.234956 | -3.547193 | -0.197178 |
| 6                                     | -2.066544 | 0.104085  | 2.416940  | 6 | -1.234956 | 3.547193  | -0.197178 |
| 6                                     | -0.008998 | -0.505063 | 3.645229  | 6 | 1.234956  | -3.547193 | -0.197178 |
| 1                                     | 0.118775  | -1.586127 | -3.542434 | 1 | 2.034848  | 3.194071  | -0.851003 |
| 1                                     | -0.640789 | -0.302353 | -4.514334 | 1 | -2.034848 | -3.194071 | -0.851003 |
| 1                                     | 0.965516  | -0.048198 | -3.838078 | 1 | 1.074674  | 4.602841  | -0.414798 |
| 1                                     | -2.413870 | 0.952288  | -1.820693 | 1 | -1.074674 | -4.602841 | -0.414798 |
| 1                                     | -2.458758 | 0.235867  | -3.429064 | 1 | 1.564089  | 3.452123  | 0.850489  |
| 1                                     | -2.474030 | -0.818513 | -1.994612 | 1 | -1.564089 | -3.452123 | 0.850489  |
| 1                                     | -2.474030 | -0.818513 | 1.994612  | 1 | -1.074674 | 4.602841  | -0.414798 |
| 1                                     | -2.458758 | 0.235867  | 3.429064  | 1 | 1.074674  | -4.602841 | -0.414798 |
| 1                                     | -2.413870 | 0.952288  | 1.820693  | 1 | -2.034848 | 3.194071  | -0.851003 |
| 1                                     | 0.965516  | -0.048198 | 3.838078  | 1 | 2.034848  | -3.194071 | -0.851003 |
| 1                                     | -0.640789 | -0.302353 | 4.514334  | 1 | -1.564089 | 3.452123  | 0.850489  |
| 1                                     | 0.118775  | -1.586127 | 3.542434  | 1 | 1.564089  | -3.452123 | 0.850489  |
| <b>N(CH<sub>3</sub>)<sub>2</sub>3</b> |           |           |           |   |           |           |           |
| 11                                    | 0.000000  | 0.000000  | 2.278942  |   |           |           |           |
| 6                                     | 0.000000  | 1.410335  | -0.012661 |   |           |           |           |
| 6                                     | 1.221386  | -0.705167 | -0.012661 |   |           |           |           |
| 6                                     | -1.221386 | -0.705167 | -0.012661 |   |           |           |           |
| 6                                     | 1.231022  | 0.710727  | -0.037970 |   |           |           |           |
| 6                                     | -0.000003 | -1.421460 | -0.037970 |   |           |           |           |
| 6                                     | -1.231019 | 0.710733  | -0.037970 |   |           |           |           |
| 1                                     | 0.000012  | 2.486265  | -0.082032 |   |           |           |           |
| 1                                     | 2.153163  | -1.243143 | -0.082032 |   |           |           |           |
| 1                                     | -2.153175 | -1.243122 | -0.082032 |   |           |           |           |
| 7                                     | 2.431047  | 1.403584  | -0.026593 |   |           |           |           |
| 7                                     | 0.000016  | -2.807140 | -0.026593 |   |           |           |           |
| 7                                     | -2.431063 | 1.403557  | -0.026593 |   |           |           |           |
| 6                                     | 2.407165  | 2.813311  | -0.403455 |   |           |           |           |
| 6                                     | 1.232816  | -3.491321 | -0.403455 |   |           |           |           |
| 6                                     | -3.639981 | 0.678011  | -0.403455 |   |           |           |           |
| 6                                     | 3.640099  | 0.677934  | -0.402788 |   |           |           |           |
| 6                                     | -1.232941 | -3.491385 | -0.402788 |   |           |           |           |
| 6                                     | -2.407158 | 2.813451  | -0.402788 |   |           |           |           |
| 1                                     | 1.803556  | 3.392284  | 0.299463  |   |           |           |           |
| 1                                     | 2.036026  | -3.258067 | 0.299463  |   |           |           |           |
| 1                                     | -3.839582 | -0.134217 | 0.299463  |   |           |           |           |
| 1                                     | 3.424537  | 3.200857  | -0.355011 |   |           |           |           |
| 1                                     | 1.059755  | -4.566164 | -0.355011 |   |           |           |           |
| 1                                     | -4.484292 | 1.365308  | -0.355011 |   |           |           |           |
| 1                                     | 2.016646  | 2.966493  | -1.419082 |   |           |           |           |
| 1                                     | 1.560735  | -3.229713 | -1.419082 |   |           |           |           |

|   |           |           |           |  |
|---|-----------|-----------|-----------|--|
| 1 | -3.577381 | 0.263220  | -1.419082 |  |
| 1 | 3.577998  | 0.263054  | -1.418413 |  |
| 1 | -1.561188 | -3.230164 | -1.418413 |  |
| 1 | -2.016810 | 2.967110  | -1.418413 |  |
| 1 | 4.484459  | 1.365144  | -0.353937 |  |
| 1 | -1.059980 | -4.566227 | -0.353937 |  |
| 1 | -3.424479 | 3.201083  | -0.353937 |  |
| 1 | 3.839226  | -0.134272 | 0.300285  |  |
| 1 | -2.035896 | -3.257731 | 0.300285  |  |
| 1 | -1.803330 | 3.392003  | 0.300285  |  |



**Table S9.** RHF/6-311++G\*\* Optimized Structures for Na<sup>+</sup>-Substituted Benzene Complexes that Gave Negative Frequencies when Calculated at the MP2(full)/6-311++G\*\* level of theory.

| <b>Cl2p</b> |           |            |           | <b>Cl3</b>  |           |           |           |
|-------------|-----------|------------|-----------|-------------|-----------|-----------|-----------|
| 11          | 0.000000  | 0.000000   | 2.228731  | 11          | 0.000000  | 0.000000  | 2.320319  |
| 6           | 0.000000  | 1.385930   | -0.323333 | 6           | 0.000000  | -1.378380 | -0.276270 |
| 6           | 0.000000  | -1.385930  | -0.323333 | 6           | -1.193712 | 0.689190  | -0.276270 |
| 6           | 1.204727  | 0.694760   | -0.328600 | 6           | 1.193712  | 0.689190  | -0.276270 |
| 6           | -1.204727 | -0.694760  | -0.328600 | 6           | 0.000000  | 1.398356  | -0.271182 |
| 6           | 1.204727  | -0.694760  | -0.328600 | 6           | -1.211012 | -0.699178 | -0.271182 |
| 6           | -1.204727 | 0.694760   | -0.328600 | 6           | 1.211012  | -0.699178 | -0.271182 |
| 17          | 0.000000  | 3.115989   | -0.332774 | 17          | 0.000000  | -3.105593 | -0.289508 |
| 17          | 0.000000  | -3.115989  | -0.332774 | 17          | -2.689522 | 1.552796  | -0.289508 |
| 1           | 2.133727  | 1.233329   | -0.358836 | 17          | 2.689522  | 1.552796  | -0.289508 |
| 1           | -2.133727 | -1.233329  | -0.358836 | 1           | 0.000000  | 2.470995  | -0.301480 |
| 1           | 2.133727  | -1.233329  | -0.358836 | 1           | -2.139945 | -1.235498 | -0.301480 |
| 1           | -2.133727 | 1.233329   | -0.358836 | 1           | 2.139945  | -1.235498 | -0.301480 |
| <b>Cl4</b>  |           |            |           | <b>Br2o</b> |           |           |           |
| 11          | 0.000000  | 0.000000   | 2.384436  | 11          | 1.840062  | -0.000001 | 2.023975  |
| 6           | -1.194432 | 0.688337   | -0.244031 | 6           | 1.534606  | -1.384473 | -0.510629 |
| 6           | 1.194432  | -0.688337  | -0.244031 | 6           | 1.534607  | 1.384472  | -0.510629 |
| 6           | 0.000000  | 1.395643   | -0.240529 | 6           | 0.339521  | -0.697557 | -0.293620 |
| 6           | 0.000000  | -1.395643  | -0.240529 | 6           | 0.339522  | 0.697557  | -0.293619 |
| 6           | 1.207550  | 0.699747   | -0.240520 | 6           | 2.718609  | 0.695216  | -0.719584 |
| 6           | -1.207550 | -0.699747  | -0.240520 | 6           | 2.718608  | -0.695217 | -0.719584 |
| 1           | -2.124204 | 1.224154   | -0.271518 | 1           | 1.523054  | -2.458056 | -0.536291 |
| 1           | 2.124204  | -1.224154  | -0.271518 | 1           | 1.523055  | 2.458055  | -0.536291 |
| 17          | -0.060236 | 3.116837   | -0.249801 | 35          | -1.223576 | -1.716544 | -0.015538 |
| 17          | 0.060236  | -3.1168370 | -0.249801 | 35          | -1.223575 | 1.716544  | -0.015538 |
| 17          | 2.726976  | 1.510600   | -0.249753 | 1           | 3.625342  | 1.240339  | -0.908742 |
| 17          | -2.726976 | -1.510600  | -0.249753 | 1           | 3.625341  | -1.240342 | -0.908742 |
| <b>Br2p</b> |           |            |           | <b>Br4</b>  |           |           |           |
| 11          | 0.000000  | 0.000000   | 2.318076  | 11          | 0.000000  | 0.000000  | 2.456316  |
| 6           | 0.000000  | 1.388458   | -0.226976 | 6           | 0.000000  | 1.376633  | -0.153936 |
| 6           | 0.000000  | -1.388458  | -0.226976 | 6           | 0.000000  | -1.376633 | -0.153936 |
| 6           | 1.204406  | 0.695125   | -0.233852 | 6           | 1.212677  | 0.697338  | -0.149428 |
| 6           | -1.204406 | -0.695125  | -0.233852 | 6           | -1.212677 | -0.697338 | -0.149428 |
| 6           | -1.204406 | 0.695125   | -0.233852 | 6           | 1.212677  | -0.697338 | -0.149428 |
| 6           | 1.204406  | -0.695125  | -0.233852 | 6           | -1.212677 | 0.697338  | -0.149428 |
| 35          | 0.000000  | 3.276435   | -0.230196 | 1           | 0.000000  | 2.449359  | -0.177167 |
| 35          | 0.000000  | -3.276435  | -0.230196 | 1           | 0.000000  | -2.449359 | -0.177167 |
| 1           | 2.136134  | 1.228909   | -0.262232 | 35          | 2.793816  | 1.720639  | -0.151655 |
| 1           | -2.136134 | -1.228909  | -0.262232 | 35          | -2.793816 | -1.720639 | -0.151655 |
| 1           | -2.136134 | 1.228909   | -0.262232 | 35          | 2.793816  | -1.720639 | -0.151655 |

|             |           |           |           |             |           |           |           |
|-------------|-----------|-----------|-----------|-------------|-----------|-----------|-----------|
| 1           | 2.136134  | -1.228909 | -0.262232 | 35          | -2.793816 | 1.720639  | -0.151655 |
| <b>I2o</b>  |           |           |           | <b>I2p</b>  |           |           |           |
| 11          | -0.001729 | 2.103150  | 2.050685  | 11          | 0.000000  | 0.000000  | 2.350551  |
| 6           | 1.381098  | 1.942549  | -0.501650 | 6           | 0.000000  | 1.396798  | -0.179672 |
| 6           | -1.382213 | 1.941684  | -0.501546 | 6           | 0.000000  | -1.396798 | -0.179672 |
| 6           | 0.699367  | 0.737402  | -0.302203 | 53          | 0.000000  | 3.505136  | -0.172563 |
| 6           | -0.699668 | 0.736966  | -0.302232 | 53          | 0.000000  | -3.505136 | -0.172563 |
| 6           | -0.695544 | 3.130167  | -0.689834 | 6           | 1.202179  | 0.695408  | -0.189439 |
| 6           | 0.693653  | 3.130583  | -0.689906 | 6           | -1.202179 | 0.695408  | -0.189439 |
| 1           | 2.454566  | 1.943050  | -0.526731 | 6           | -1.202179 | -0.695408 | -0.189439 |
| 1           | -2.455686 | 1.941484  | -0.526451 | 6           | 1.202179  | -0.695408 | -0.189439 |
| 53          | 1.886800  | -0.988182 | -0.017395 | 1           | 2.138910  | 1.220666  | -0.215450 |
| 53          | -1.885999 | -0.989466 | -0.017668 | 1           | -2.138910 | 1.220666  | -0.215450 |
| 1           | -1.242265 | 4.039662  | -0.860774 | 1           | -2.138910 | -1.220666 | -0.215450 |
| 1           | 1.239804  | 4.040398  | -0.860968 | 1           | 2.138910  | -1.220666 | -0.215450 |
| <b>I4</b>   |           |           |           | <b>CN2o</b> |           |           |           |
| 11          | 0.000000  | 0.000000  | 2.463224  | 11          | 0.000005  | 3.581919  | 0.000000  |
| 6           | -1.156155 | 0.737948  | -0.116959 | 6           | -0.000003 | -1.734467 | -1.399969 |
| 6           | 1.156155  | -0.737948 | -0.116959 | 6           | -0.000003 | -1.734467 | 1.399969  |
| 6           | 0.067388  | 1.404402  | -0.109777 | 6           | -0.000010 | -0.545203 | -0.703067 |
| 6           | -0.067388 | -1.404402 | -0.109777 | 6           | -0.000010 | -0.545203 | 0.703067  |
| 6           | 1.245468  | 0.652462  | -0.109808 | 6           | 0.000008  | -2.930863 | 0.690760  |
| 6           | -1.245468 | -0.652462 | -0.109808 | 6           | 0.000008  | -2.930863 | -0.690760 |
| 1           | -2.060012 | 1.314863  | -0.137064 | 1           | -0.000007 | -1.733242 | -2.473668 |
| 1           | 2.060012  | -1.314863 | -0.137064 | 1           | -0.000007 | -1.733242 | 2.473668  |
| 53          | 0.000000  | 3.514675  | -0.107359 | 6           | -0.000003 | 0.741491  | -1.352620 |
| 53          | 0.000000  | -3.514675 | -0.107359 | 6           | -0.000003 | 0.741491  | 1.352620  |
| 53          | 3.187926  | 1.479893  | -0.107572 | 7           | 0.000003  | 1.815475  | -1.707749 |
| 53          | -3.187926 | -1.479893 | -0.107572 | 7           | 0.000003  | 1.815475  | 1.707749  |
|             |           |           |           | 1           | 0.000015  | -3.861387 | 1.227007  |
|             |           |           |           | 1           | 0.000015  | -3.861387 | -1.227007 |
| <b>CN2p</b> |           |           |           |             |           |           |           |
| 11          | 0.000000  | 0.000000  | 2.298434  |             |           |           |           |
| 6           | 0.000000  | 1.385202  | -0.394983 |             |           |           |           |
| 6           | 0.000000  | -1.385202 | -0.394983 |             |           |           |           |
| 6           | 0.000000  | 2.827681  | -0.376276 |             |           |           |           |
| 6           | 0.000000  | -2.827681 | -0.376276 |             |           |           |           |
| 7           | 0.000000  | 3.955669  | -0.328211 |             |           |           |           |
| 7           | 0.000000  | -3.955669 | -0.328211 |             |           |           |           |
| 6           | 1.210624  | 0.693082  | -0.404152 |             |           |           |           |
| 6           | -1.210624 | 0.693082  | -0.404152 |             |           |           |           |
| 6           | -1.210624 | -0.693082 | -0.404152 |             |           |           |           |
| 6           | 1.210624  | -0.693082 | -0.404152 |             |           |           |           |

|                         |           |           |           |                         |           |           |           |
|-------------------------|-----------|-----------|-----------|-------------------------|-----------|-----------|-----------|
| 1                       | 2.138164  | 1.234766  | -0.433267 |                         |           |           |           |
| 1                       | -2.138164 | 1.234766  | -0.433267 |                         |           |           |           |
| 1                       | -2.138164 | -1.234766 | -0.433267 |                         |           |           |           |
| 1                       | 2.138164  | -1.234766 | -0.433267 |                         |           |           |           |
| <b>NO<sub>2</sub>1</b>  |           |           |           |                         |           |           |           |
| 11                      | -2.215805 | -0.968221 | 0.000000  |                         |           |           |           |
| 6                       | 0.371676  | 0.416190  | 0.000000  |                         |           |           |           |
| 6                       | 0.389335  | -2.333361 | 0.000000  |                         |           |           |           |
| 7                       | 0.375142  | 1.889869  | 0.000000  |                         |           |           |           |
| 1                       | 0.422905  | -3.408138 | 0.000000  |                         |           |           |           |
| 6                       | 0.386656  | -0.251735 | 1.214707  |                         |           |           |           |
| 6                       | 0.386656  | -0.251735 | -1.214707 |                         |           |           |           |
| 1                       | 0.416307  | 0.304297  | 2.131742  |                         |           |           |           |
| 1                       | 0.416307  | 0.304297  | -2.131742 |                         |           |           |           |
| 6                       | 0.386656  | -1.641220 | -1.207443 |                         |           |           |           |
| 6                       | 0.386656  | -1.641220 | 1.207443  |                         |           |           |           |
| 1                       | 0.424184  | -2.177329 | -2.138066 |                         |           |           |           |
| 1                       | 0.424184  | -2.177329 | 2.138066  |                         |           |           |           |
| 8                       | 0.362386  | 2.424627  | 1.055316  |                         |           |           |           |
| 8                       | 0.362386  | 2.424627  | -1.055316 |                         |           |           |           |
| <b>NO<sub>2</sub>2m</b> |           |           |           | <b>NO<sub>2</sub>2p</b> |           |           |           |
| 11                      | 4.510362  | -0.918389 | 0.005808  | 11                      | 0.000000  | 0.000000  | 2.466789  |
| 6                       | -0.471501 | -0.448011 | -0.001471 | 6                       | 0.378292  | 1.301143  | -0.334563 |
| 6                       | -1.005465 | 2.301146  | 0.001390  | 6                       | -0.378292 | -1.301143 | -0.334563 |
| 1                       | -0.274843 | -1.500158 | -0.002666 | 6                       | 1.361691  | 0.327038  | -0.358870 |
| 1                       | -1.218076 | 3.352854  | 0.002402  | 6                       | -1.361691 | -0.327038 | -0.358870 |
| 6                       | -2.047691 | 1.384788  | 0.001686  | 6                       | 0.974530  | -1.005371 | -0.338149 |
| 6                       | 0.302310  | 1.862926  | -0.000287 | 6                       | -0.974530 | 1.005371  | -0.338149 |
| 1                       | -3.070198 | 1.708639  | 0.003011  | 7                       | 0.787848  | 2.714348  | -0.305213 |
| 1                       | 1.118536  | 2.557913  | -0.000620 | 7                       | -0.787848 | -2.714348 | -0.305213 |
| 6                       | 0.540916  | 0.494326  | -0.001509 | 1                       | 2.397090  | 0.605254  | -0.406416 |
| 6                       | -1.760802 | 0.031429  | 0.000273  | 1                       | -2.397090 | -0.605254 | -0.406416 |
| 7                       | 1.905722  | 0.024707  | -0.003437 | 1                       | 1.700322  | -1.795492 | -0.349203 |
| 7                       | -2.863606 | -0.938371 | 0.000570  | 1                       | -1.700322 | 1.795492  | -0.349203 |
| 8                       | 2.803212  | 0.817587  | -0.002947 | 8                       | 1.868612  | 2.967108  | -0.703733 |
| 8                       | 2.124366  | -1.153254 | -0.004250 | 8                       | -1.868612 | -2.967108 | -0.703733 |
| 8                       | -2.567407 | -2.085771 | -0.000277 | 8                       | 0.000000  | 3.479264  | 0.143016  |
| 8                       | -3.961523 | -0.501180 | 0.001669  | 8                       | 0.000000  | -3.479264 | 0.143016  |

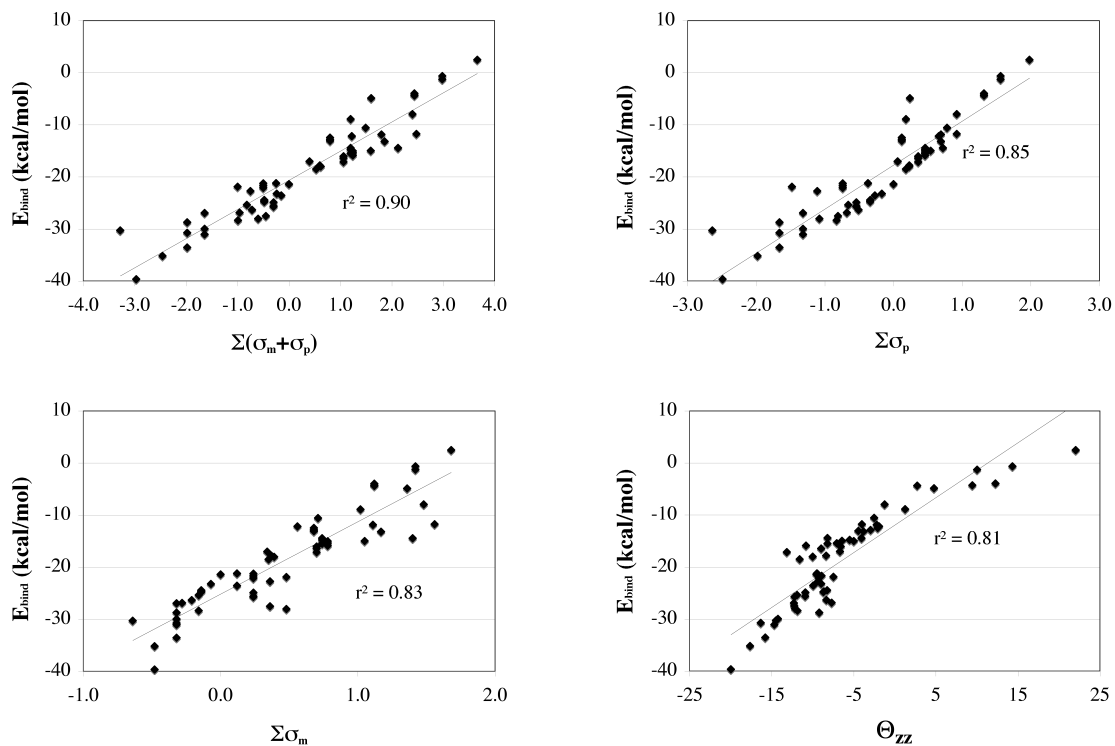

**Figure S1.** Correlation between cation- $\pi$  binding energies ( $E_{\text{bind}}$ ) and either (a)  $\Sigma(\sigma_m + \sigma_p)$ , (b)  $\Sigma\sigma_p$ , (c)  $\Sigma\sigma_m$ , or (d)  $\Theta_{zz}$ , for the substituted benzenes in Table 1 of the manuscript.
